# Supplementary material for: Quality of life of patients with dementia in acute hospitals in Germany: a non-randomised, case–control study comparing a regular ward with a special care ward with dementia care concept
Source: PubMed Central journal article supplement — BMJ Open. 2019 Sep 6;9(9):e030743. doi: 10.1136/bmjopen-2019-030743 (PMC6731932; doi:10.1136/bmjopen-2019-030743), 2019-09-06
Supplement: bmjopen-2019-030743.draft_revisions.pdf [file bmjopen-2019-030743.draft_revisions.pdf]

# BMJ Open

BMJ Open is committed to open peer review. As part of this commitment we make the peer review history of every article we publish publicly available.

When an article is published we post the peer reviewers' comments and the authors' responses online. We also post the versions of the paper that were used during peer review. These are the versions that the peer review comments apply to.

The versions of the paper that follow are the versions that were submitted during the peer review process. They are not the versions of record or the final published versions. They should not be cited or distributed as the published version of this manuscript.

BMJ Open is an open access journal and the full, final, typeset and author-corrected version of record of the manuscript is available on our site with no access controls, subscription charges or pay-per-view fees (<http://bmjopen.bmj.com>).

If you have any questions on BMJ Open's open peer review process please email [info.bmjopen@bmj.com](mailto:info.bmjopen@bmj.com)

# BMJ Open

## Quality of Life of Patients with Dementia in Acute Hospitals: Comparing a regular ward to a special care ward with dementia care concept. A Bayesian Multilevel Model Analysis.

|                               |                                                                                                                                                                                   |
|-------------------------------|-----------------------------------------------------------------------------------------------------------------------------------------------------------------------------------|
| Journal:                      | <i>BMJ Open</i>                                                                                                                                                                   |
| Manuscript ID                 | bmjopen-2019-030743                                                                                                                                                               |
| Article Type:                 | Research                                                                                                                                                                          |
| Date Submitted by the Author: | 01-Apr-2019                                                                                                                                                                       |
| Complete List of Authors:     | Lüdecke, Daniel; University Medical Center Hamburg, Department of Medical Sociology<br>Poppele, Georg; Evangelisches Krankenhaus Alsterdorf<br>Klein, Jens<br>Kofahl, Christopher |
| Keywords:                     | Dementia < NEUROLOGY, Quality of Life, Acute Hospital, Quality of Care, INTERNAL MEDICINE                                                                                         |
|                               |                                                                                                                                                                                   |

SCHOLARONE™  
Manuscripts

**Title**

Quality of Life of Patients with Dementia in Acute Hospitals: Comparing a regular ward to a special care ward with dementia care concept. A Bayesian Multilevel Model Analysis.

**Authors**

Daniel Lüdecke, Georg Poppele, Jens Klein, Christopher Kofahl

**Corresponding author**

Daniel Lüdecke

Department of Medical Sociology

University Medical Center Hamburg-Eppendorf

Martinistr. 52

20246 Hamburg

Germany

Email: [d.luedecke@uke.de](mailto:d.luedecke@uke.de)

ORCID iD: 0000-0002-8895-3206

Tel.: ++49 40 7410 52878

**Co-authors**

Georg Poppele, Evangelisches Krankenhaus Alsterdorf (Protestant Hospital Alsterdorf), Hamburg, Germany

Jens Klein, University Medical Center Hamburg-Eppendorf, Department of Medical Sociology, Hamburg, Germany

Christopher Kofahl, University Medical Center Hamburg-Eppendorf, Department of Medical Sociology, Hamburg, Germany

**Keywords**

Dementia, Quality of Life, Acute Hospital, Quality of Care, Internal Medicine

**Word Count:** 4.230 (excluding title page, abstract, strength and limitations, references, tables)

## Abstract

**Objectives:** To identify factors that predict the quality of life (QoL) of patients with dementia in acute hospitals and to analyse if a special care concept can increase the patients' QoL.

**Design:** A non-randomised case-control-study, including two internal medicine wards from hospitals in Hamburg, Germany.

**Setting and Participants:** In all, 526 patients with dementia from two hospitals were included in the study (intervention: n=333; control: n=193). Inclusion criteria was an at least mild cognitive impairment or dementia. The intervention group was a hospital with a special care ward for internal medicine focussing on patients with dementia. The control group was from a hospital with a regular care ward without special dementia care concept.

**Outcome Measures:** Our main outcome was the QoL (range 0-100) from patients with dementia in two different hospitals. A Bayesian multilevel analysis was conducted to identify predictors like age, dementia, agitation, physical and chemical restraints or functional limitations that affect QoL.

**Results:** QoL differs significantly between the control (40.7) and intervention group (51.2),  $p < 0.001$ . Regression analysis suggests that physical restraint (estimated effect: -5.0), psychotropic drugs use (-4.4) and agitation (-2.9) are negatively associated with QoL. After controlling for confounders, the positive effect of the special care concept remained (5.7).

**Conclusions:** A special care ward will improve the quality of care and has a positive impact on the QoL of patients with dementia. Health policies should consider the benefits of special care concepts and develop incentives for hospitals to improve the QoL and quality of care for these patients.

## Article Summary

### Strengths and Limitations

- This is one of the first studies to investigate quality of life of patients with dementia in acute internal medicine wards in Germany.
- Study results suggest that a special care concept leads to a clinically relevant improvement in quality of life for patients with dementia.
- The statistical method applied in this study explicitly incorporates and accounts for information from previous research.
- The structural differences between the hospitals from the control and intervention may limit the generalizability of the results regarding the benefit of special care concepts for regular internal medicine wards.

## Introduction

Acute hospitals face the challenge of an increase in old-age patients, which particularly affects internal medicine wards [1]. The average age of patients in internal medicine wards is above 70 years and may even come close to 80 years [2,3], leading to an increasing prevalence of cognitive impairments [4]. Although data on the occurrence of dementia or cognitive impairments of patients in hospitals is inconsistent, the larger proportion of studies report prevalence rates of about 40% [5–7].

Many hospitals are insufficiently prepared for patients with cognitive impairments, especially in acute care units predominantly focussing on somatic diseases [8]. Patients with cognitive impairments or dementia do not fit into the typical routines and standardised workflows of hospitals as these patients need more resources for care and treatment [9,10]. These patients often become disoriented, anxious, agitated and challenge hospital staff with erratic behaviour when placed in regular care wards. This results in an increased likelihood of falls, complications during the hospital stay and post-operative complications [11,12]. Hence, patients with dementia are a vulnerable group with a higher risk for long-lasting functional impairments [13,14].

To control the challenging behaviour of patients with dementia, a common practice – at least in German acute hospitals, and especially for older patients – is to use physical restraints like side rails to keep patients in bed, or chemical restraints such as the on-demand-use of psychotropic medication or hypnotics and sedatives [15,16]. This practise is not limited to German hospitals; however, there seems to be large variations between countries [17]. Physical and chemical restraints as well as anxiety and challenging behaviour are associated with poorer outcomes in quality of life [QoL] and quality of care of patients with dementia [18,19]. Therefore, hospitals in general, and specifically internal medicine wards with their increasing proportion of patients with

1  
2  
3 dementia, need to address these issues in order to improve the quality of care for these  
4  
5 patients.  
6

7  
8 At least in Germany, there were lately no care concepts that fully address the needs of  
9  
10 patients with dementia in internal medicine [20]. The special care ward “DAVID” in the  
11  
12 Protestant Hospital Alsterdorf in Hamburg was one of the first internal medicine wards  
13  
14 in Germany that implemented a comprehensive care concept for patients with dementia,  
15  
16 aiming to improve the patients’ QoL during their hospital stay. QoL is an important  
17  
18 indicator of quality of care and a major dimension when assessing patient reported  
19  
20 outcomes, particularly in older people as global outcome measure for interventions  
21  
22 [21,22]. The assumption of this care concept is that a special care ward for patients with  
23  
24 dementia leads to better outcomes in QoL compared to regular internal medicine wards.  
25  
26 A study (“DAVID 2”) was conducted to investigate the impact of such a care concept. This  
27  
28 paper shows the results of this study and addresses two research questions. First, which  
29  
30 factors predict the QoL of patients with dementia in acute hospitals? Second, beyond  
31  
32 these factors, can a special care concept for patients with dementia in acute hospitals  
33  
34 increase the patients’ QoL?  
35  
36  
37  
38  
39  
40  
41  
42

## 43 **Methods**

### 44 **Study Design and Setting**

45  
46 The aim of this study was to compare the quality of care for patients with dementia  
47  
48 within a specialised dementia care concept as opposed to regular care in acute hospitals.  
49  
50 The present study was designed as a non-randomised case-control-study, including two  
51  
52 internal medicine wards in two hospitals located in Hamburg, Germany. The  
53  
54 intervention group was a hospital that implemented a special care ward for internal  
55  
56 medicine focussing on patients with dementia. The control group was from a hospital  
57  
58  
59  
60

1  
2  
3 with a regular care ward for internal medicine, which had no special dementia care  
4  
5 concept.  
6  
7  
8  
9

### 10 **Intervention Group**

11  
12 The special care ward “DAVID” is an internal medicine ward in the Protestant Hospital  
13  
14 Alsterdorf and has 14 beds. In the year of data collection (2016), 349 patients were  
15  
16 treated. The ward employed nine care workers as nursing staff.  
17  
18

19 Key components of the special care concept are a) a specific architectural design,  
20  
21 including a homelike lounge, a specific colouring of doors and walls, and a light concept  
22  
23 with minimum 500 lux at eye level; b) doctors, care workers and service staff are trained  
24  
25 in coping with challenging behaviour and other dementia related issues; c) mobile  
26  
27 devices for diagnostics, to perform as many treatments as possible in the different  
28  
29 rooms of the special care ward; d) involvement of relatives into assessment, care and  
30  
31 discharge planning; and e) regular therapeutic offers like occupational or speech  
32  
33 therapy, and social offers like music, playing or spending more time than usual to care  
34  
35 for the patients.  
36  
37  
38  
39

40 To fulfil these high standards of quality of care, the ward “DAVID” employs more care  
41  
42 staff in relation to the number of patients as compared to other regular internal  
43  
44 medicine wards.  
45  
46  
47  
48  
49

### 50 **Control Group**

51  
52 The regular care ward is part of a larger hospital with emergency hospitalisation. It has  
53  
54 80 beds and in the year of data collection, about 3.500 patients were treated in this  
55  
56 internal medicine ward. Twenty-six employees worked as care staff in this ward.  
57  
58

59 Trainees sometimes supported the care team. The regular care ward had no specific care  
60



1  
2  
3 concept for dementia patients. The care staff was not particularly trained in dementia  
4  
5 topics.  
6  
7  
8  
9

### 10 **Data collection and participants**

11  
12 An assessment questionnaire was developed to obtain data from patients with dementia.  
13  
14 Study nurses were trained in using this assessment questionnaire and then conducted  
15  
16 the data collection in both hospitals. Two study nurses were responsible for the special  
17  
18 care ward and one for the regular care ward. A pre-test of two months was conducted to  
19  
20 test and revise the questionnaire. As a result, some items were removed and instructions  
21  
22 for study nurses were defined more precisely. After the pre-test, data was collected over  
23  
24 a period of 12 months. To detect small to medium effect sizes (Cohen's  $d \sim 0.1$  to  $0.2$ ), a  
25  
26 power analysis was performed prior to the data collection and yielded a sample size of  
27  
28 at least 173 subjects per group. Patients were included when they showed at least mild  
29  
30 cognitive impairments or memory problems. In the special care ward (intervention  
31  
32 group) all patients were assessed because a diagnosed dementia was a requirement for  
33  
34 admission to that hospital. Hence, the participation rate for the special care ward was  
35  
36 about 94% and excluded only a few patients that were not responsive. For the regular  
37  
38 care ward (control group), a short dementia screening was used to assess the severity of  
39  
40 dementia, in order to identify patients who qualify for the study [23]. This was necessary  
41  
42 because not all patients have had a clarified dementia diagnosis. The total sample size  
43  
44 for the present analysis consists of  $N=526$  patients (special care ward:  $n=333$ ; regular  
45  
46 care ward:  $n=193$ ).  
47  
48  
49  
50  
51  
52  
53

54  
55 Prior to the study, a study protocol was developed and submitted to the ethical  
56  
57 committee of the medical association of Hamburg. The ethical committee approved the  
58  
59 proposal and attested that the study conforms to ethical and legal requirements  
60

1  
2  
3 (approval code PV5102). Study participants were not able to give their informed  
4  
5 consent due to their cognitive impairments. However, as data mostly derived from the  
6  
7 hospitals' regular documentation and was completely anonymous, the ethics committee  
8  
9 waived the need of an informed consent.  
10  
11  
12  
13

### 14 **Patient and Public involvement**

15  
16  
17 Patients and the public were not involved in the development of the research question  
18  
19 nor study design.  
20  
21  
22  
23

### 24 **Measures**

25  
26 *Outcome:* QoL in patients with dementia was assessed using the QUALIDEM [24,25].  
27  
28 After observing patients for about one week (depending on the length of stay), the study  
29  
30 nurses rated their QoL. QUALIDEM comprises 37 items reflecting nine different  
31  
32 subdomains of QoL: "care relationship" (7 items, 0-21 points), "positive affect" (6 items,  
33  
34 0-18 points), "negative affect" (3 items, 0-9 points), "restless and tense behaviour" (3  
35  
36 items, 0-9 points), "positive self-image" (3 items, 0-9 points), "social relations" (6 items,  
37  
38 0-18 points), "social isolation" (3 items, 0-9 points), "feeling at home" (4 items, 0-12  
39  
40 points) and "have something to do" (2 items, 0-6 points). For patients with very severe  
41  
42 dementia (Minimental State Examination Test [26] [MMSE] < 7), only six of the nine  
43  
44 subscales apply, where the dimensions "positive self-image", "feeling at home" and "have  
45  
46 something to do" were omitted. The recommendation is to report descriptive results of  
47  
48 the QUALIDEM separately for each subscale. For regression analyses, a QoL index was  
49  
50 calculated, ranging from 0 to 100 points with a higher score indicating better QoL. The  
51  
52 QUALIDEM total score applies to all severities of dementia, so all patients' scores are  
53  
54 comparable [27].  
55  
56  
57  
58  
59  
60

1  
2  
3 *Independent Variables:* Age, gender, main diagnosis for admission to hospital and length  
4  
5 of stay were recorded. A modified version of the Charlson's Comorbidity Index [CCI],  
6  
7 which included depression and hypertension as new items, was built based upon the  
8  
9 assessment of comorbidities and chronic diseases [28,29]. If patients had no chronic  
10  
11 illnesses, the CCI had a score of zero points. Else, higher scores indicated more serious  
12  
13 comorbid disease. Shortly after admission to hospital, the study nurses measured  
14  
15 functional limitations and cognitive status of patients. Functional limitations in daily  
16  
17 living were assessed with the Barthel-Index [30]. This score ranges from 0 (completely  
18  
19 dependent) to 100 points (no basic functional limitations) and was recoded according to  
20  
21 the classification of the ICD-10 [31] (German adaption) into a score from 1 to 6 points.  
22  
23 The Minimental State Examination Test [26] [MMSE] measures the cognitive  
24  
25 impairments of patients, ranging from 0 (very strong cognitive impairments) to 30 (very  
26  
27 mild or no cognitive impairments) points. This score was recoded into three categories,  
28  
29 also based on ICD-10 classification: severe dementia (0-16), moderate dementia (17-23  
30  
31 points) and mild dementia (24-27 points).  
32  
33  
34 After about one week of hospital stay, the study nurses rated the patients' agitation and  
35  
36 challenging behaviour and recorded psychotropic drug use (chemical restraint) and  
37  
38 physical restraints. Agitation and challenging behaviour of patients was assessed using  
39  
40 the Pittsburgh Agitation Scale [PAS] [32] ranging from 0 to 16 points (higher scores  
41  
42 indicate stronger agitation).  
43  
44  
45 Physical restraints were defined as the use of one the following measures: Side rails to  
46  
47 keep a patient in bed, tying a patient to a bed, and use of "therapeutic" chairs that  
48  
49 prevent patients to stand up. The variable was dichotomised, indicating whether  
50  
51 patients (in the course of the hospital stay) were mechanically restrained by at least one  
52  
53 of these measures or not.  
54  
55  
56  
57  
58  
59  
60

1  
2  
3 Psychotropic drug use was defined as on-demand-use (“as-needed”) of medication for  
4 the nervous system by means of the Anatomical Therapeutic Chemical (ATC)  
5 classification [33] and comprises antipsychotics, anxiolytics, hypnotics/sedatives and  
6 antidepressants (N05A-C, N06A). Indicated use of psychotropic drugs was defined as  
7 medications that were prescribed for regular, not on-demand-use and not only given to  
8 patients in order to control their challenging behaviour. Such use of psychotropic drugs  
9 was excluded from the analysis. The on-demand-use variable was dichotomised and  
10 shows whether, during the complete hospital stay, chemical restraints were applied to  
11 patients or not.  
12  
13  
14  
15  
16  
17  
18  
19  
20  
21  
22  
23

24 While these variables already cover many different aspects that have an effect on the  
25 QoL, a dummy variable for the hospitals used as proxy for the intervention estimates the  
26 impact of the special care concept. This should reflect how much of the change in QoL is  
27 attributable to the special care concept.  
28  
29  
30  
31  
32  
33  
34  
35

### 36 **Missing Data**

37  
38 In total, 11% of individual items across all scales were missing (at random). The missing  
39 data pattern was analysed and missing data was imputed using the multivariate  
40 imputation by chained equations method [34], using 11 imputation steps corresponding  
41 to the proportion of missing data [35]. The method for imputing missing values depends  
42 on the variable’s nature. For continuous variables, predictive mean matching was  
43 applied, while logistic regressions were used for binary variables.  
44  
45  
46  
47  
48  
49  
50  
51  
52  
53  
54

### 55 **Statistical Methods**

56  
57 Descriptive results for the total sample and each hospital are reported. Statistically  
58 significant differences of  $p < 0.05$  between the two hospital wards were tested using t-  
59  
60

1  
2  
3 tests,  $\chi^2$ -tests or Mann-Whitney-U-tests, depending on the level of measurement and  
4  
5 distribution of variables. Differences between the hospitals in the QUALIDEM subscales  
6  
7 are presented as boxplots, showing the median value and upper and lower quartiles of  
8  
9 the value distribution.

10  
11  
12 As multivariate analysis, a Bayesian linear mixed model was applied to analyse the  
13  
14 associations between the independent variables and the outcome. Computations were  
15  
16 based on Stan [36], a probabilistic programming language for specifying Bayesian  
17  
18 models, using Markov Chain Monte Carlo sampling (in particular, Hamiltonian Monte  
19  
20 Carlo) [37]. We assume that the patients' main diagnosis is associated with different  
21  
22 degrees of physical impairments, which affect the QoL. Therefore, the variable 'main  
23  
24 diagnosis' was used as level-2 unit (*random intercept*) in the multilevel model to control  
25  
26 for the variation in the outcome. We used informative priors for the predictors age,  
27  
28 female gender, severe dementia, psychotic drug use and physical restraints, based on  
29  
30 information from former research [18,38,39]. Weakly informative priors were used for  
31  
32 the remaining predictors. The prior and posterior distributions of the model are  
33  
34 summarised in the supplemental material (see Supplementary File 1).

35  
36  
37 Continuous predictors were centred before entering the model. Age was divided by 10,  
38  
39 so a 1-unit change in the predictor of age reflects a change of 10 years in patients. The  
40  
41 median value of the posterior distribution is used as "Bayesian point estimate", which  
42  
43 minimises the difference of estimates from true values over posterior samples, but there  
44  
45 are many other plausible values (the "posterior distribution") to describe the association  
46  
47 between predictors and outcome. Hence, 50% and 89% highest density intervals [40]  
48  
49 [HDI] are shown to indicate the range of most credible values and to reflect the (un-  
50  
51 )certainty of the estimates. The intraclass correlation coefficient [41] was calculated to  
52  
53 see how much of the proportion of the variance in the outcome can be explained by the  
54  
55  
56  
57  
58  
59  
60

1  
2  
3 grouping structure ('main diagnosis'). We developed post-hoc additional regression  
4  
5 models with interaction terms for need predictors (Barthel-Index, physical and chemical  
6  
7 restraints, PAS-Score) to check if the associations between the complexity of patients'  
8  
9 needs and QoL differ between hospitals. We found no significant interaction terms and  
10  
11 decided to present the most parsimonious model here and show further results in the  
12  
13 appendix (see Supplementary File 2).  
14  
15

16  
17 All analyses were conducted with the R statistical package [42], including the packages  
18  
19 *mice* [34], *ggplot* [43], *brms* [44] and *sjPlot* [45]. The source code is available in the  
20  
21 supplemental material (see Supplementary File 3). Data is available online [46].  
22  
23  
24  
25

## 26 27 **Results**

### 28 29 **Sample Characteristics**

30  
31 Table 1 gives an overview of the sample characteristics. The proportion of female to  
32  
33 male patients is similar in both groups. The mean age is 4 years higher in the control  
34  
35 group. There are also significant group differences in the Barthel-Index indicating higher  
36  
37 functional impairment in the control group, while the dementia severity was the same in  
38  
39 both hospitals. Comorbid conditions are slightly higher in the control group. Patients  
40  
41 stayed 9.4 days in hospital on average and nearly one day longer in the intervention  
42  
43 group as compared to the control group. Large differences between the two hospitals  
44  
45 can be seen in the use of medical and physical restraints with significantly less use in the  
46  
47 intervention group. Agitation- and QoL-scores also show strong group differences to the  
48  
49 disadvantage of the patients in the control group.  
50  
51  
52  
53  
54  
55  
56  
57  
58  
59  
60

Table 1: Sample Characteristics

| Characteristic                            | Control Group (Regular Care Ward, n=193) | Intervention Group (Special Care Ward, n=333) | Total (N=526) | p-value of difference |
|-------------------------------------------|------------------------------------------|-----------------------------------------------|---------------|-----------------------|
| Female, %                                 | 59.1                                     | 61.6                                          | 60.6          | .637                  |
| Mean Age (SD)                             | 83.1 (7.2)                               | 79.0 (11.9)                                   | 80.5 (10.6)   | <.001                 |
| Mean_Barthel-Index (SD)                   | 29.9 (27.9)                              | 40.7 (30.4)                                   | 36.7 (29.9)   | <.001                 |
| Mild Dementia, %                          | 7.8                                      | 9.6                                           | 8.9           | .580                  |
| Moderate Dementia, %                      | 30.0                                     | 26.7                                          | 27.9          | .473                  |
| Severe Dementia, %                        | 62.2                                     | 63.7                                          | 63.2          | .805                  |
| Mean_Length of Stay (SD)                  | 8.9 (7.5)                                | 9.7 (5.5)                                     | 9.4 (6.3)     | .002                  |
| Physical Restraints (yes), %              | 54.4                                     | 28.2                                          | 37.8          | <.001                 |
| Psychotropic Drug Use (yes, as-needed), % | 25.9                                     | 14.1                                          | 18.4          | .001                  |
| Mean-Score Pittsburg Agitation Scale (SD) | 3.9 (3.1)                                | 3.0 (3.2)                                     | 3.3 (3.2)     | <.001                 |
| Mean Charlson' Comorbidity Index (SD)     | 3.2 (3.0)                                | 2.5 (2.0)                                     | 2.8 (1.6)     | <.001                 |
| Mean Qualidem Total Score (SD)            | 40.7 (14.5)                              | 51.2 (17.2)                                   | 47.3 (17.0)   | <.001                 |

Barthel-Index: 0-100 (higher = better functioning); Dementia (MMSE score): mild: 24-27; moderate: 17-23; severe: <= 16; Pittsburg Agitation Scale: 0-16 (higher = stronger agitation and anxiety); Charlson' Comorbidity Index: 0-9 (higher = more comorbidities); QUALIDEM: 0-100 (higher = better QoL)

### Quality of life

Looking at the QoL for patients with severe to mild cognitive impairments (these are the ones, in which all subdomains of the QUALIDEM could be applied), there is a consistent pattern across all QUALIDEM-domains: Patients in the control group have a lower QoL compared to the intervention group. Except for the last subdomain ('having something to do'), all differences are statistically significant (Figure 1).

The same consistent pattern can be found for patients with very severe dementia symptoms (MMSE score < 7). Here, only the second of the six applied subdomains ('positive affect') does not differ significantly between intervention and control (Figure 2).

## Predictors of quality of life

Figure 3 shows the results from the Bayesian mixed model. Three predictors are clearly negatively associated with QoL: physical restraint, psychotropic drug use and agitation (PAS-score). Physical restraint is associated with a 4.9-point decrease in QoL. With 50% probability, the QoL decreases by 4.1 to 5.8 points and with a chance of 89% by -7 to -2.8 points respectively. The application of psychotropic drugs as-needed shows similar results, with a posterior median of -4.4. The third clearly negative associated predictor is agitation, which shows a decrease in QoL of about 2.9 points for each additional point in the PAS-score.

Dementia and gender are not clearly associated with QoL. Neither are the length of hospital stay and the CCI.

The age of the patient correlates slightly positive with QoL, where an increase of 10 years means an increase of about 1.2 points in the QoL. The posterior median of the Barthel-Index is 2.0, so for a one-category change in functional impairments the QoL changes by two points. This means that patients with severe functional impairments differ by about 10 points in QoL compared to patients with no functional impairments. Controlling for all other predictors, the intervention (special care ward) shows the strongest association with our outcome of interest, the patients' QoL. The posterior median is 5.7, and with an 89% probability, the credible values describing the effect of the intervention on QoL are within the range from 3.8 to 7.6.

The intraclass correlation coefficient of the model is rather low (0.01). This means, the 'main diagnosis' does not explain much of the variance in the patients' QoL and there is almost no regularization ("shrinkage") of estimated model parameters and no larger differences between hospitals according to the patients' needs, as indicated by their main diagnosis.



## Discussion

The study reported in this paper sought to understand those factors that influence the QoL in patients with dementia and whether a special care concept for these patients performs better in this regard as opposed to regular care wards.

One of our main findings is that QoL differs significantly between the control and intervention group. We found substantial differences between the two hospitals in the patients' total QoL score in favour of the special care ward. Beyond the statistical significance, this finding also has a clinical impact. Studies suggest a change in 3 points for the Quality of Life – Alzheimer's Disease Scale [47], which has a range of 40 points, to be clinically relevant [48,49]. Transferred to the range of the QUALIDEM scale, a difference of about 7.5 points would be considered as an important improvement in QoL. Another indicator to evaluate the clinical relevance of a change in QoL is an increase of the score of half a standard deviation [50], which would be about 8.5 points for our data. Taking these reference points as a basis, we found evidence for the clinical relevant improvement in QoL of patients in a special care ward.

A second key finding is the identification of those factors that are clearly associated with QoL. The use of physical and chemical restraints, both happening more frequently in the control group, are associated with lower outcomes in QoL. This finding is in line with other studies that suggest a negative association between physical and chemical restraints and QoL [18,39] and explains why the regular care ward performs less good in this regard than the special care ward. Agitation was also negatively associated with QoL. This is understandable as agitation is an expression of anxiety and indisposition of people with dementia and typically occurs after admission to hospital. Furthermore, agitation is often a reason for psychotropic drug use or physical restraint and, thus, also negatively affects QoL [51,52]. Independent from these factors, the special care ward

1  
2  
3 itself shows the strongest impact on QoL, indicating that patients with dementia  
4 explicitly benefit from specialised care concepts. Other studies also report these  
5 benefits, both in a nursing home or hospital setting [53,54]. Since we controlled for  
6 patient characteristics like main diagnosis, age, functional limitations, chronic  
7 comorbidities, agitation, length of stay etc. in our model, we do not assume that the  
8 positive effect of the special care ward is completely a result of a biased sample between  
9 intervention and control group. Although the two compared hospitals differ in their  
10 structures and size, patients' characteristics are largely comparable between the  
11 samples in the control and intervention group. For instance, there is no substantial  
12 difference between the two hospitals regarding the relationship between functional  
13 impairments and physical restraints. Moreover, to see if the complexity of patients' need  
14 affect our findings, we calculated regression models with interaction terms between  
15 need factors moderated by hospitals (see Supplementary File 2). The association  
16 between complexity of needs and QoL is not significantly different between the  
17 intervention and control group. Based on our results we suggest that the special care  
18 concept mainly explains the differences in the QoL. Although it is certainly difficult to  
19 determine the exact effect of the special care concept on the patients' QoL, our findings  
20 seem plausible in the light of the key elements of this intervention. A higher ratio of care  
21 staff as to patients, smaller facilities or systematically trained employees can be  
22 considered essential for health care provision to patients with dementia and are much  
23 better conditions for less physical or chemical restraints, independent of the functional  
24 limitations of patients. The special care ward provides a more dementia-friendly interior  
25 design, including orientation and navigation aids and the use of light and colours, which  
26 are considered as important components to reduce agitation for patients with dementia  
27 [55]. These findings and conclusions are in line with other studies on hospital care that  
28  
29  
30  
31  
32  
33  
34  
35  
36  
37  
38  
39  
40  
41  
42  
43  
44  
45  
46  
47  
48  
49  
50  
51  
52  
53  
54  
55  
56  
57  
58  
59  
60

1  
2  
3 suggest that an increased staff ratio or the implementation of multiple components,  
4 which particularly address the needs of patients with dementia, lead to reduced use of  
5 physical restraints and psychotropic drug use and improve the quality of care [56,57].  
6  
7

8  
9  
10 The special care ward benefits from a higher staff ratio, i.e. nurses have to care for fewer  
11 patients with dementia compared to the control group. While this is an intentional  
12 element of the concept, the downside is higher personnel costs. Only few studies  
13 investigated the follow-up costs for patients with dementia in home care settings after  
14 hospitalization. Costa et al. predicted additional monthly costs in home care of about  
15 445 Euros due to increased agitation of patients with dementia [58]. Thus, if patients  
16 with dementia benefit from special care concepts and perceive better outcomes in  
17 quality of life and care, the increased costs for more care personnel may be compensated  
18 by reducing follow-up costs for the ambulatory care. However, further research is  
19 needed to give more exact projections of the increased costs and potential of saving  
20 money.  
21  
22  
23  
24  
25  
26  
27  
28  
29  
30  
31  
32  
33  
34

35  
36 Another finding is that the severity of cognitive impairments, measured with the MMSE,  
37 is a rather improper indicator to represent the underlying problems of and with the  
38 dementia disease, as these factors were not consistently associated with QoL. Direct  
39 measures of the problems associated with dementia, as agitation or challenging  
40 behaviour, should be considered as well when it comes to investigate the QoL of patients  
41 with dementia.  
42  
43  
44  
45  
46  
47  
48

49  
50 Our study has several limitations. One concerns the structural differences between the  
51 two hospitals. The hospital with the special care ward is much smaller than the hospital  
52 that hosted the control group. A second control group or an intervention group in a  
53 hospital of a similar size as the hospital with the regular care ward may have permitted  
54 a more distinct comparison. However, since we accounted for many different patient  
55  
56  
57  
58  
59  
60

1  
2  
3 characteristics including functional status, comorbidities and behavioural problems, we  
4  
5 assume that a bias due to patient selection mechanisms is rather low. Another structural  
6  
7 difference between the intervention and control group that certainly affects the results  
8  
9 are the different staff ratios. In the special care ward, nurses have to care for fewer  
10  
11 patients than in the regular care ward. Although we assume that this aspect probably  
12  
13 has the highest impact on the outcomes in QoL, this is not a “selection bias” but a core  
14  
15 component of the intervention. A further limitation is possibly the first and thus rather  
16  
17 exploratory use of the QUALIDEM assessment in a hospital setting. Although studies  
18  
19 show reliable results of the QUALIDEM in nursing homes even for a short observation  
20  
21 period of about one week [59], there are no studies that evaluate the reliability and  
22  
23 validity for use in hospitals. We have done checks of internal consistencies, which  
24  
25 showed that most subdomains of the QUALIDEM perform well with our data and are  
26  
27 comparable to results from other validation studies [60]. This indicates that the use of  
28  
29 the QUALIDEM is feasible for hospital research. However, we cannot give evidence on  
30  
31 the interrater reliability apart from the intense training of the study nurses.  
32  
33  
34  
35  
36  
37  
38  
39  
40

## 41 **Conclusions**

42  
43 On the whole, we think that a special care ward will improve the quality of care and is  
44  
45 effective regarding the positive impact on the QoL of patients with dementia. Our study  
46  
47 showed that after controlling for different predictors, the intervention still has a  
48  
49 perceptible effect concerning clinical important differences in our outcome of interest,  
50  
51 the patients’ quality of life. However, such improvements can only be achieved by  
52  
53 implementing a concept with multiple components that address the explicit needs of  
54  
55 patients with dementia. The implementation of a special care concept usually increases  
56  
57 the costs for hospitals because it requires a higher staff-patient-ratio, regular training of  
58  
59  
60

1  
2  
3 employees or more therapeutic offers. On the other hand, costs that accumulate in  
4  
5 informal care after hospital stay as a result of poorer quality of care in hospitals can be  
6  
7 much higher than additional personnel costs and could probably be reduced [58,61].  
8  
9

10 Health policies should consider the benefits of special care concepts and develop  
11  
12 incentives for hospitals to improve the QoL and quality of care for patients with  
13  
14  
15 dementia.  
16  
17  
18  
19  
20  
21  
22  
23  
24  
25  
26  
27  
28  
29  
30  
31  
32  
33  
34  
35  
36  
37  
38  
39  
40  
41  
42  
43  
44  
45  
46  
47  
48  
49  
50  
51  
52  
53  
54  
55  
56  
57  
58  
59  
60

For peer review only

## Acknowledgement

The authors are grateful to the clinical staff of both hospitals who supported this study by helping with the data collection. Furthermore, we are thankful to the Authority of Health and Consumer Protection and the Homann-foundation for funding this study.

## Author Contributions

DL was involved in conception and design of the study, analysis and interpretation of data and drafting the article. GP was involved in conception and design of the study and interpretation of data. JK was involved in interpretation of data and drafting the article. CK was involved in conception and design of the study, interpretation of data and drafting the article.

## Competing interests

The authors have declared that no competing interests exist.

## Funding

The present study was funded by the Behörde für Gesundheit und Verbraucherschutz (Authority of Health and Consumer Protection) in Hamburg and the Homann-foundation (grant number Z/65454/2014/F500-02.10/10,002). No one of the funders was involved in the data analysis process and did not influence or hold back results of the study.

## Ethics approval and consent to participate

Prior to the study, a study protocol was developed and submitted to the ethical committee of the medical association of Hamburg ("Ethik-Kommission der Ärztekammer Hamburg"). The IRB of the ethical committee approved the proposal and attested that the study conforms to ethical and legal requirements (approval code PV5102). Study participants were not able to give their informed consent due to their cognitive impairments. However, as data mostly derived from the hospitals' regular documentation and was completely anonymous, the IRB of the ethics committee waived the need of an informed consent.

### Availability of data and material

All data generated or analysed during this study are included are available in the Zenodo repository (DOI: 10.5281/zenodo.1479677) at <https://doi.org/10.5281/zenodo.1479676>.

For peer review only

## References

- 1 Recine U, Scotti E, Bruzzese V, *et al.* The change of hospital internal medicine: a study on patients admitted in internal medicine wards of 8 hospitals of the Lazio area, Italy. *Ital J Med* 2015;9:252. doi:10.4081/itjm.2015.523
- 2 Raveh D, Gratch L, Yinnon AM, *et al.* Demographic and clinical characteristics of patients admitted to medical departments. *J Eval Clin Pract* 2005;11:33–44. doi:10.1111/j.1365-2753.2004.00492.x
- 3 Sonnenblick M, Raveh D, Gratch L, *et al.* Clinical and demographic characteristics of elderly patients hospitalised in an internal medicine department in Israel: Characteristics of elderly patients in medical wards. *Int J Clin Pract* 2007;61:247–54. doi:10.1111/j.1742-1241.2006.00925.x
- 4 Mukadam N, Sampson EL. A systematic review of the prevalence, associations and outcomes of dementia in older general hospital inpatients. *Int Psychogeriatr* 2011;23:344–55. doi:10.1017/S1041610210001717
- 5 Zekry D, Herrmann FR, Grandjean R, *et al.* Does dementia predict adverse hospitalization outcomes? A prospective study in aged inpatients. *Int J Geriatr Psychiatry* 2009;24:283–91. doi:10.1002/gps.2104
- 6 Lyketsos CG, Sheppard JM, Rabins PV. Dementia in elderly persons in a general hospital. *Am J Psychiatry* 2000;157:704–7. doi:10.1176/appi.ajp.157.5.704
- 7 Sampson EL, Blanchard MR, Jones L, *et al.* Dementia in the acute hospital: prospective cohort study of prevalence and mortality. *Br J Psychiatry J Ment Sci* 2009;195:61–6. doi:10.1192/bjp.bp.108.055335
- 8 Pinkert C, Holle B. Menschen mit Demenz im Akutkrankenhaus: Literaturübersicht zu Prävalenz und Einweisungsgründen. *Z Für Gerontol Geriatr* 2012;45:728–34. doi:10.1007/s00391-012-0319-1
- 9 Dutzi I, Schwenk M, Micol W, *et al.* Patienten mit Begleitdiagnose Demenz. *Z Für Gerontol Geriatr* 2013;46:208–13. doi:10.1007/s00391-013-0483-y
- 10 Timmons S, O’Shea E, O’Neill D, *et al.* Acute hospital dementia care: results from a national audit. *BMC Geriatr* 2016;16:113. doi:10.1186/s12877-016-0293-3
- 11 Pi H-Y, Gao Y, Wang J, *et al.* Risk Factors for In-Hospital Complications of Fall-Related Fractures among Older Chinese: A Retrospective Study. *BioMed Res Int* 2016;2016:1–11. doi:10.1155/2016/8612143
- 12 Hu C-J, Liao C-C, Chang C-C, *et al.* Postoperative Adverse Outcomes in Surgical Patients with Dementia: A Retrospective Cohort Study. *World J Surg* 2012;36:2051–8. doi:10.1007/s00268-012-1609-x
- 13 Motzek T, Junge M, Marquardt G. Einfluss der Demenz auf Verweildauer und Erlöse im Akutkrankenhaus. *Z Für Gerontol Geriatr* 2017;50:59–66. doi:10.1007/s00391-016-1040-2



- 14 Gross AL, Jones RN, Habtemariam DA, *et al.* Delirium and Long-term Cognitive Trajectory Among Persons With Dementia. *Arch Intern Med* 2012;172:1324. doi:10.1001/archinternmed.2012.3203
- 15 Nakanishi M, Okumura Y, Ogawa A. Physical restraint to patients with dementia in acute physical care settings: effect of the financial incentive to acute care hospitals. *Int Psychogeriatr* 2017;:1–10. doi:10.1017/S104161021700240X
- 16 Krüger C, Mayer H, Haastert B, *et al.* Use of physical restraints in acute hospitals in Germany: a multi-centre cross-sectional study. *Int J Nurs Stud* 2013;50:1599–606. doi:10.1016/j.ijnurstu.2013.05.005
- 17 Heinze C, Dassen T, Grittner U. Use of physical restraints in nursing homes and hospitals and related factors: a cross-sectional study: Physical restraints in nursing homes and hospitals. *J Clin Nurs* 2012;21:1033–40. doi:10.1111/j.1365-2702.2011.03931.x
- 18 Beerens HC, Sutcliffe C, Renom-Guiteras A, *et al.* Quality of Life and Quality of Care for People With Dementia Receiving Long Term Institutional Care or Professional Home Care: The European RightTimePlaceCare Study. *J Am Med Dir Assoc* 2014;15:54–61. doi:10.1016/j.jamda.2013.09.010
- 19 Beerens HC, Zwakhalen SMG, Verbeek H, *et al.* Factors associated with quality of life of people with dementia in long-term care facilities: A systematic review. *Int J Nurs Stud* 2013;50:1259–70. doi:10.1016/j.ijnurstu.2013.02.005
- 20 Kricheldorf C, Hofmann W. Demenz im Akutkrankenhaus. *Z Für Gerontol Geriatr* 2013;46:196–7. doi:10.1007/s00391-013-0484-x
- 21 Treurniet HF, Essink-Bot M-L, Mackenbach JP, *et al.* Health-related quality of life: an indicator of quality of care? *Qual Life Res* 1997;6:363–9. doi:10.1023/A:1018435427116
- 22 Valderas JM, Alonso J. Patient reported outcome measures: a model-based classification system for research and clinical practice. *Qual Life Res* 2008;17:1125–35. doi:10.1007/s11136-008-9396-4
- 23 Kaiser AK, Hitzl W, Iglseider B. Three-question dementia screening: Development of the Salzburg Dementia Test Prediction (SDTP). *Z Für Gerontol Geriatr* 2014;47:577–82. doi:10.1007/s00391-013-0568-7
- 24 Ettema TP, Dröes R-M, de Lange J, *et al.* QUALIDEM: development and evaluation of a dementia specific quality of life instrument. Scalability, reliability and internal structure. *Int J Geriatr Psychiatry* 2007;22:549–56. doi:10.1002/gps.1713
- 25 Dichter MM, Ettema TP, Schwab CGG, *et al.* Benutzerhandbuch für die deutschsprachige QUALIDEM Version 2.0. Witten: 2016.
- 26 Folstein MF, Folstein SE, McHugh PR. “Mini-mental state”. A practical method for grading the cognitive state of patients for the clinician. *J Psychiatr Res* 1975;12:189–98.
- 27 Dichter MN, Meyer G. Quality of Life of People with Dementia in Nursing Homes. In: Schüssler S, Lohrmann C, eds. *Dementia in Nursing Homes*. Cham: Springer International Publishing 2017. 139–57. doi:10.1007/978-3-319-49832-4\_11

- 1  
2  
3 28 Charlson ME, Pompei P, Ales KL, *et al.* A new method of classifying prognostic  
4 comorbidity in longitudinal studies: development and validation. *J Chronic Dis*  
5 1987;40:373–83.  
6  
7 29 Charlson ME, Charlson RE, Peterson JC, *et al.* The Charlson comorbidity index is  
8 adapted to predict costs of chronic disease in primary care patients. *J Clin Epidemiol*  
9 2008;61:1234–40. doi:10.1016/j.jclinepi.2008.01.006  
10  
11 30 Mahoney FI, Barthel DW. Functional Evaluation: The Barthel Index. *Md State Med J*  
12 1965;14:61–5.  
13  
14 31 Deutsches Institut f. medizinische Dokumentation u. Information (DIMDI). *ICD-10-GM*  
15 *2017 Systematisches Verzeichnis*. Lich, Hess: pictura Werbung 2016.  
16  
17 32 Rosen J, Burgio L, Kollar M, *et al.* The Pittsburg Agitation Scale: A user-friendly  
18 instrument for rating agitation in dementia patients. *Am J Geriatr Psychiatry Off J Am*  
19 *Assoc Geriatr Psychiatry* 1994;2:52–9.  
20  
21 33 WHO Collaborating Centre for Drug Statistics Methodology, editor. *Guidelines for ATC*  
22 *classification and DDD assignment 2013*. Oslo: 2012.  
23  
24 34 Buuren S van, Groothuis-Oudshoorn K. mice: Multivariate Imputation by Chained  
25 Equations in R. *J Stat Softw* 2011;45. doi:10.18637/jss.v045.i03  
26  
27 35 White IR, Royston P, Wood AM. Multiple imputation using chained equations: Issues and  
28 guidance for practice. *Stat Med* 2011;30:377–99. doi:10.1002/sim.4067  
29  
30 36 Carpenter B, Gelman A, Hoffman MD, *et al.* Stan: A Probabilistic Programming  
31 Language. *J Stat Softw* 2017;76. doi:10.18637/jss.v076.i01  
32  
33 37 Gelman A, Carlin JB, Stern HS, *et al.* *Bayesian data analysis*. Third edition. Boca Raton:  
34 CRC Press 2014.  
35  
36 38 Barca ML, Engedal K, Laks J, *et al.* Quality of Life among Elderly Patients with  
37 Dementia in Institutions. *Dement Geriatr Cogn Disord* 2011;31:435–42.  
38 doi:10.1159/000328969  
39  
40 39 Beer C, Flicker L, Horner B, *et al.* Factors Associated with Self and Informant Ratings of  
41 the Quality of Life of People with Dementia Living in Care Facilities: A Cross Sectional  
42 Study. *PLoS ONE* 2010;5:e15621. doi:10.1371/journal.pone.0015621  
43  
44 40 McElreath R. *Statistical rethinking: a Bayesian course with examples in R and Stan*. Boca  
45 Raton London New York: CRC Press, Taylor & Francis Group 2016.  
46  
47 41 Hox JJ. *Multilevel analysis: techniques and applications*. 2nd ed. New York: Routledge  
48 2010.  
49  
50 42 R Core Team. *R: A Language and Environment for Statistical Computing*. Vienna,  
51 Austria: R Foundation for Statistical Computing 2018. <https://www.R-project.org/>  
52  
53 43 Wickham H. *ggplot2: Elegant Graphics for Data Analysis*. 2nd ed. New York: Springer  
54 2016.  
55  
56  
57  
58  
59  
60

- 1  
2  
3 44 Bürkner P-C. brms: An R Package for Bayesian Multilevel Models Using Stan. *J Stat*  
4 *Softw* 2017;80. doi:10.18637/jss.v080.i01  
5  
6  
7 45 Lüdtke D. *sjPlot: Data Visualization for Statistics in Social Science*. 2018.  
8 doi:10.5281/zenodo.1308157  
9  
10 46 Lüdtke D. Dataset: Quality Of Life Of Patients With Dementia In Acute Hospitals-  
11 Version 1.0. 2018. doi:10.5281/zenodo.1479677  
12  
13 47 Thorgrimsen L, Selwood A, Spector A, *et al*. Whose quality of life is it anyway? The  
14 validity and reliability of the Quality of Life-Alzheimer's Disease (QoL-AD) scale.  
15 *Alzheimer Dis Assoc Disord* 2003;17:201–8.  
16  
17 48 Selwood A, Thorgrimsen L, Orrell M. Quality of life in dementia--a one-year follow-up  
18 study. *Int J Geriatr Psychiatry* 2005;20:232–7. doi:10.1002/gps.1271  
19  
20 49 Hoe J, Hancock G, Livingston G, *et al*. Changes in the quality of life of people with  
21 dementia living in care homes. *Alzheimer Dis Assoc Disord* 2009;23:285–90.  
22 doi:10.1097/WAD.0b013e318194fc1e  
23  
24 50 Norman GR, Sloan JA, Wyrwich KW. Interpretation of Changes in Health-related Quality  
25 of Life: The Remarkable Universality of Half a Standard Deviation. *Med Care*  
26 2003;41:582–92. doi:10.1097/01.MLR.0000062554.74615.4C  
27  
28 51 Lam K, Kwan JSK, Wai Kwan C, *et al*. Factors Associated With the Trend of Physical  
29 and Chemical Restraint Use Among Long-Term Care Facility Residents in Hong Kong:  
30 Data From an 11-Year Observational Study. *J Am Med Dir Assoc* 2017;18:1043–8.  
31 doi:10.1016/j.jamda.2017.06.018  
32  
33 52 Ó Flatharta T, Haugh J, Robinson SM, *et al*. Prevalence and predictors of bedrail use in  
34 an acute hospital. *Age Ageing* 2014;43:801–5. doi:10.1093/ageing/afu081  
35  
36 53 Kok JS, Berg IJ, Scherder EJA. Special Care Units and Traditional Care in Dementia:  
37 Relationship with Behavior, Cognition, Functional Status and Quality of Life - A Review.  
38 *Dement Geriatr Cogn Disord Extra* 2013;3:360–75. doi:10.1159/000353441  
39  
40 54 von Renteln-Kruse W, Neumann L, Klugmann B, *et al*. Geriatric Patients With Cognitive  
41 Impairment. *Dtsch Arztebl Int* 2015;112:103–12. doi:10.3238/arztebl.2015.0103  
42  
43 55 Büter K, Motzek T, Dietz B, *et al*. Demenzsensible Krankenhausstationen:  
44 Expertenempfehlungen zu Planung und Gestaltung. *Z Für Gerontol Geriatr* 2017;50:67–  
45 72. doi:10.1007/s00391-016-1079-0  
46  
47 56 Blair A, Anderson K, Bateman C. The “Golden Angels”: effects of trained volunteers on  
48 specialising and readmission rates for people with dementia and delirium in rural hospitals.  
49 *Int Psychogeriatr* 2018;:1–10. doi:10.1017/S1041610218000911  
50  
51 57 Sinvani L, Warner-Cohen J, Strunk A, *et al*. A Multicomponent Model to Improve  
52 Hospital Care of Older Adults with Cognitive Impairment: A Propensity Score-Matched  
53 Analysis. *J Am Geriatr Soc* Published Online First: 11 August 2018.  
54 doi:10.1111/jgs.15452  
55  
56  
57  
58  
59  
60

- 1  
2  
3 58 Costa N, Wübker A, De Mauléon A, *et al.* Costs of Care of Agitation Associated With  
4 Dementia in 8 European Countries: Results From the RightTimePlaceCare Study. *J Am*  
5 *Med Dir Assoc* 2018;19:95.e1-95.e10. doi:10.1016/j.jamda.2017.10.013  
6  
7  
8 59 Dichter MN, Schwab CGG, Meyer G, *et al.* Item distribution, internal consistency and  
9 inter-rater reliability of the German version of the QUALIDEM for people with mild to  
10 severe and very severe dementia. *BMC Geriatr* 2016;16. doi:10.1186/s12877-016-0296-0  
11  
12 60 Dichter M, Dortmann O, Halek M, *et al.* Scalability and internal consistency of the  
13 German version of the dementia-specific quality of life instrument QUALIDEM in  
14 nursing homes – a secondary data analysis. *Health Qual Life Outcomes* 2013;11:91.  
15 doi:10.1186/1477-7525-11-91  
16  
17  
18 61 Leon J, Cheng CK, Neumann PJ. Alzheimer’s disease care: costs and potential savings.  
19 *Health Aff Proj Hope* 1998;17:206–16.  
20  
21  
22  
23  
24  
25  
26  
27  
28  
29  
30  
31  
32  
33  
34  
35  
36  
37  
38  
39  
40  
41  
42  
43  
44  
45  
46  
47  
48  
49  
50  
51  
52  
53  
54  
55  
56  
57  
58  
59  
60

## Figure Titles and Legends

Figure 1: QUALIDEM subdomain scores by care ward in patients with mild to severe dementia (MMSE score from 7 to 27, n = 400)

Figure 2: QUALIDEM subdomain scores by care ward, patients with very severe dementia (MMSE score < 7, n = 126)

Figure 3: Predictors of Health Related Quality of Life, Regression Coefficients, Bayesian Linear Mixed Model, Posterior Median (+50% and 89% High Density Interval)

## Supplementary Files

Supplementary File 1: Methodological comments, Word document (docx-format).

Supplementary File 2: Regression Models with Interaction Terms, Word document (docx-format).

Supplementary File 3: R Souce Code (to use with R statistics, CC BY-NC 4.0 license)

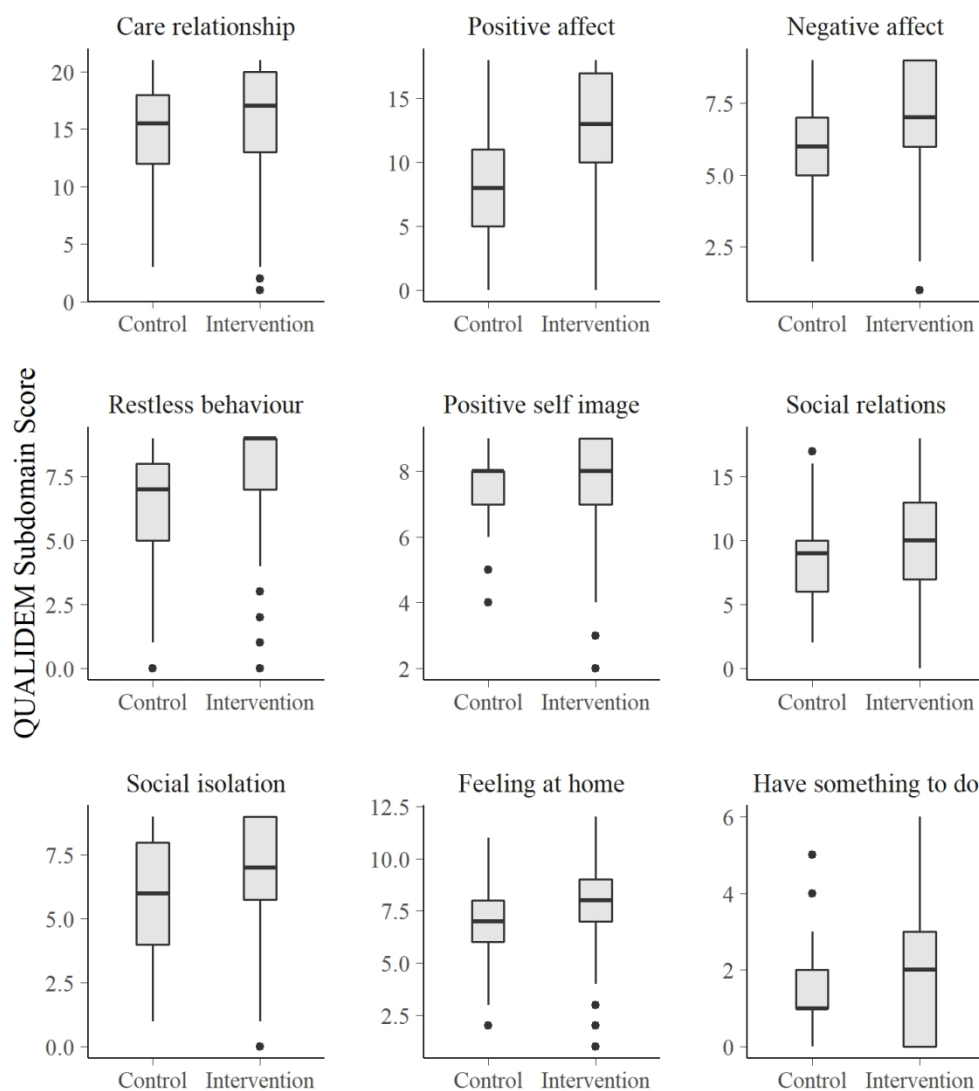

Figure 1: QUALIDEM subdomain scores by care ward in patients with mild to severe dementia (MMSE score from 7 to 27, n = 400)

169x189mm (220 x 220 DPI)

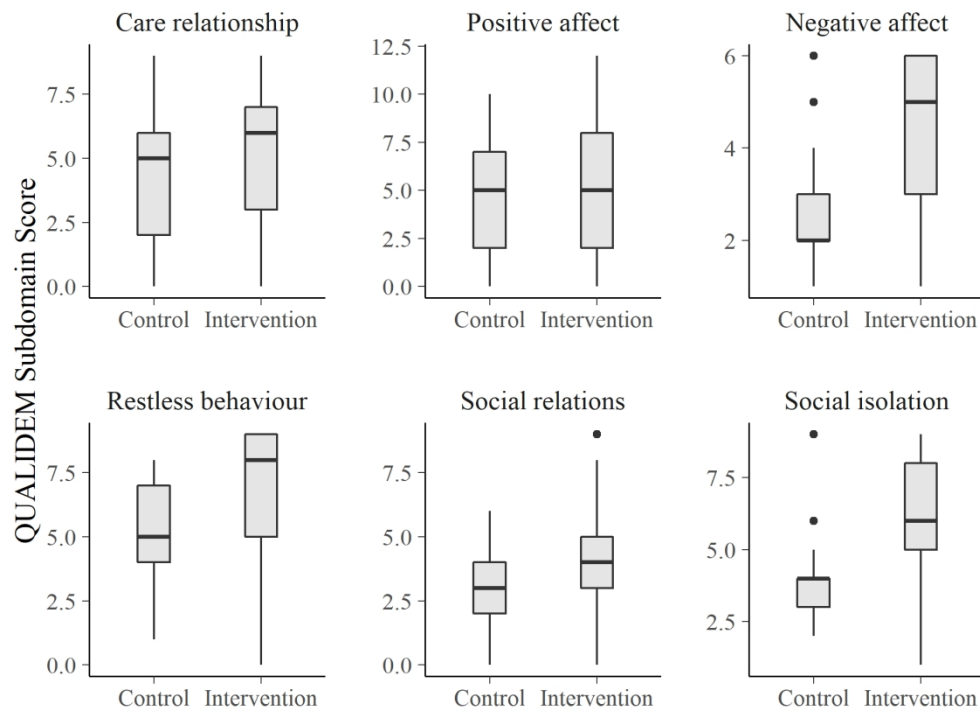

Figure 2: QUALIDEM subdomain scores by care ward, patients with very severe dementia (MMSE score < 7, n = 126)

169x125mm (300 x 300 DPI)

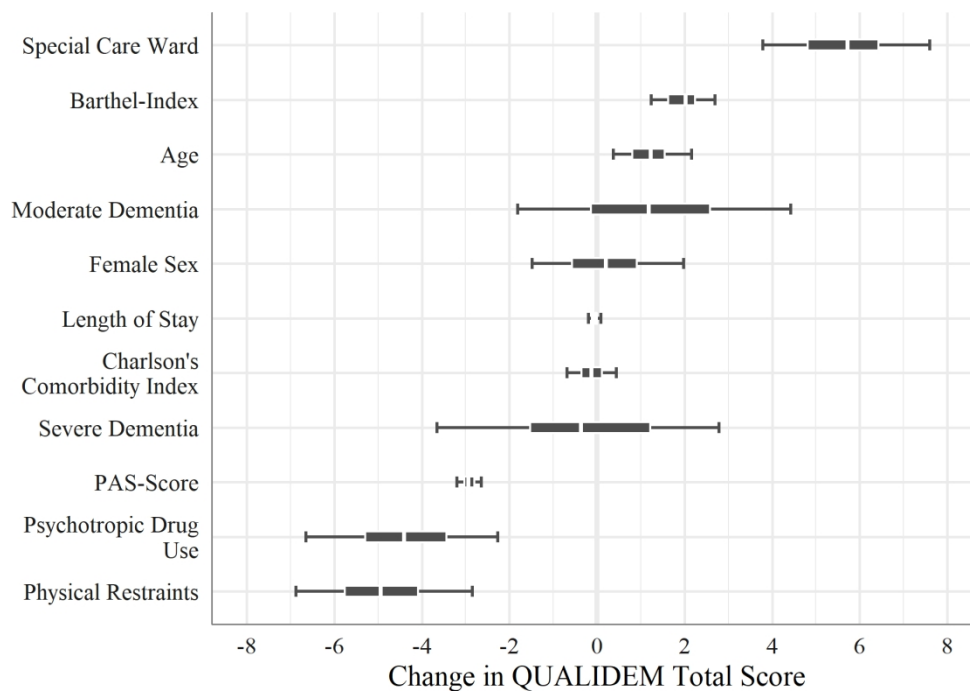

Figure 3: Predictors of Health Related Quality of Life, Regression Coefficients, Bayesian Linear Mixed Model, Posterior Median (+50% and 89% High Density Interval)

169x119mm (300 x 300 DPI)



## Supplemental Material 1

### Quality of Life of Patients with Dementia in Acute Hospitals: Comparing a regular ward to a special care ward with dementia care concept. A Bayesian Multilevel Model Analysis.

#### Methodological comments

##### *1. Short note on Bayesian Methods*

Bayesian methods are probably not very common, and readers may ask “Why use Bayesian regression models?” Gelman et al.<sup>1</sup> give a well summarized answer to this question: “A pragmatic rationale for the use of Bayesian methods is the inherent flexibility introduced by their incorporation of multiple levels of randomness and the resultant ability to combine information from different sources, while incorporating all reasonable sources of uncertainty in inferential summaries. Such methods naturally lead to smoothed estimates in complicated data structures and consequently have the ability to obtain better real-world answers.”<sup>1</sup>. Shortly speaking, advantages of Bayesian methods are, for instance, the ability to derive probability statements for every quantity of interest or explicitly incorporate prior knowledge about parameters into the model.

##### *2. Distribution of Posterior Samples from the Regression Model*

Contrary to a frequentist approach, there is no unique point estimate in Bayesian analysis. The posterior median minimises the expected absolute error (i.e. the difference of estimates from true values over posterior samples), but there are many other plausible values to describe the association between predictors and outcome, which is called the *distribution of posterior samples*. Credible or Highest Density Intervals are based on quantiles of this distribution and indicate the probability of an estimate being inside this interval. In terms of inference, this allows us to say that with, e.g. 50% probability, the true effect of a *Special Care Ward* on our outcome lies between 5.1 and 6.6. Figure S1 shows the distribution of posterior samples from our regression model.

**Figure S1: Distribution of Posterior Samples from Regression Model**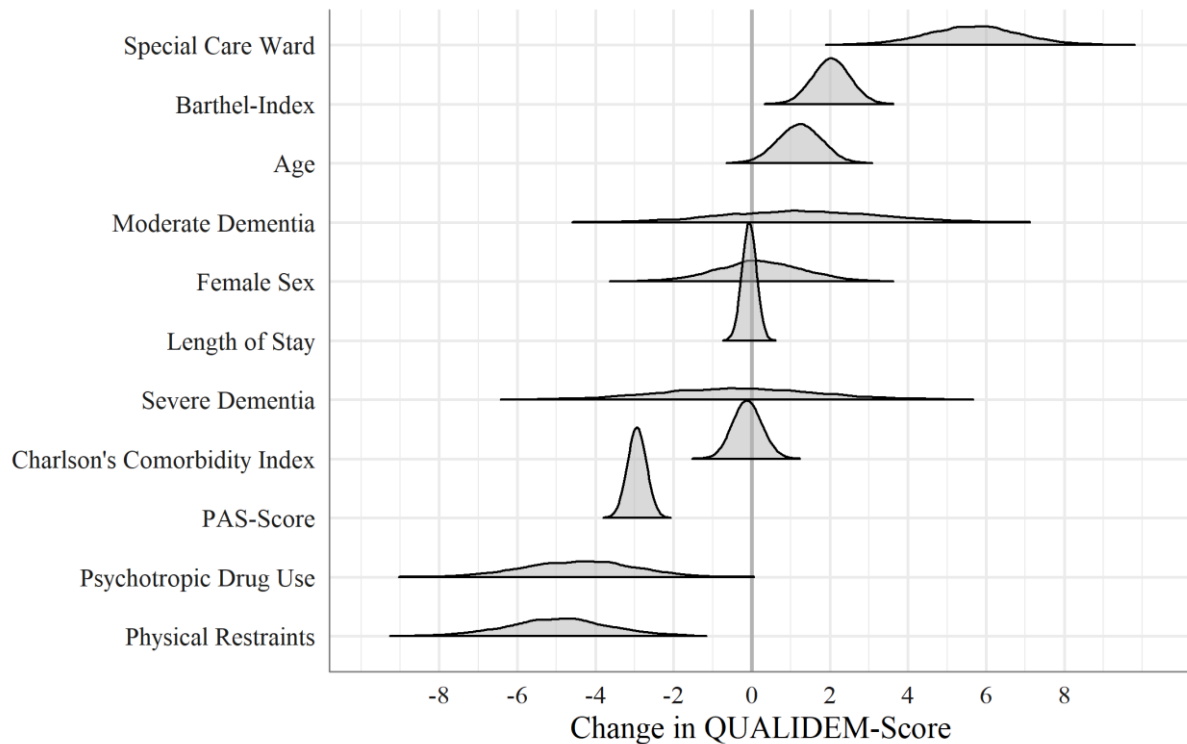**3. Tabular Summary from the Regression Model**

Table S1 provides a summary of the regression model, including the data for two different Highest Density Intervals as well as the ratio of effective number of samples. The ratio should be 1.0 or close to 1.0 and indicates whether the samples were efficient, which means that the results for the related coefficient are reliable. Furthermore, all  $R_{hat}$  values of the models were approximately 1. The  $R_{hat}$  statistic<sup>2</sup> measures the ratio of the average variance of the draws within each chain to the variance of the pooled draws across chains. If the chains have not converged to a common distribution, the  $R_{hat}$  statistic will tend to be greater than one, indicating that more iterations may be required for reliable results.

**Table S1:** Predictors of Quality of Life, Regression Coefficients, Bayesian Linear Mixed Model, Posterior Median (+50% and 89% Highest Density Intervals)

| Term                                   | Estimate | SE  | 50% HDI     | 89% HDI     | Ratio of effective Number of Samples |
|----------------------------------------|----------|-----|-------------|-------------|--------------------------------------|
| (Intercept)                            | 46.2     | 2.2 | 45.2 – 48.2 | 42.7 – 49.8 | 1.00                                 |
| Length of Stay                         | -0.1     | 0.1 | -0.1 – 0.0  | -0.2 – 0.1  | 1.00                                 |
| Age                                    | 1.2      | 0.5 | 0.8 – 1.5   | 0.4 – 2.1   | 1.00                                 |
| Moderate Dementia                      | 1.2      | 2.0 | -0.1 – 2.7  | -1.8 – 4.6  | 1.00                                 |
| Severe Dementia                        | -0.4     | 2.0 | -1.6 – 1.1  | -3.6 – 2.7  | 1.00                                 |
| Female                                 | 0.2      | 1.1 | -0.5 – 1.0  | -1.6 – 1.9  | 1.00                                 |
| Barthel Score                          | 2.0      | 0.5 | 1.8 – 2.4   | 1.3 – 2.8   | 1.00                                 |
| Physical Restraints (yes)              | -4.9     | 1.2 | -5.8 – -4.1 | -7.0 – -2.8 | 1.00                                 |
| Special Care Ward (Intervention)       | 5.7      | 1.2 | 4.9 – 6.5   | 3.8 – 7.6   | 1.00                                 |
| PAS-Score                              | -2.9     | 0.2 | -3.1 – -2.8 | -3.2 – -2.7 | 1.00                                 |
| Charlson's Comorbidity Index           | -0.1     | 0.3 | -0.4 – 0.1  | -0.6 – 0.5  | 1.00                                 |
| Psychotropic Drug Use (yes, as-needed) | -4.4     | 1.4 | -5.3 – -3.5 | -6.5 – -2.1 | 1.00                                 |
| sigma                                  | 11.9     | 0.4 | 11.5 – 12.0 | 11.3 – 12.5 | 1.00                                 |

All Rhat values ~ 1, all mcse < 0.05. Results based on 4 chains each 1000 iterations for each chain. LOO-adjusted R<sup>2</sup>: 0.500

#### 4. Test for Practical Equivalence of Parameters

Bayesian methods do not perform classical “null hypothesis significance tests”. Rather, to account for the uncertainty in estimation and the magnitude of parameter values, Kruschke<sup>3</sup> suggests checking whether parameter values lie inside a certain range that is considered as “practically no effect”.

Figure S2 shows the distribution of the 95% Highest Density Intervals of posterior samples and indicates whether these lie completely outside, completely inside or partially inside the region of practical equivalence (ROPE). If the HDI is completely outside the ROPE, the “null hypothesis” for this parameter is “rejected”. If the ROPE completely covers the HDI, i.e. all most credible values of a parameter are inside the region of practical equivalence, the null hypothesis is accepted. Else, it is undecided whether to accept or reject the null hypothesis.

The ROPE limits are specified following Kruschke's suggestion, which is defined as  $0 \pm SD(\text{dependent variable}) * 0.1$  for linear models.

Physical restraint, psychotropic drug use, agitation (PAS-score) and the intervention (special care ward) are those predictors that can be considered as relevant for our outcome.

**Figure S2:** 95%-Range of the Distribution of Posterior Samples from Regression Model; Region of Practical Equivalence emphasized in light-blue.

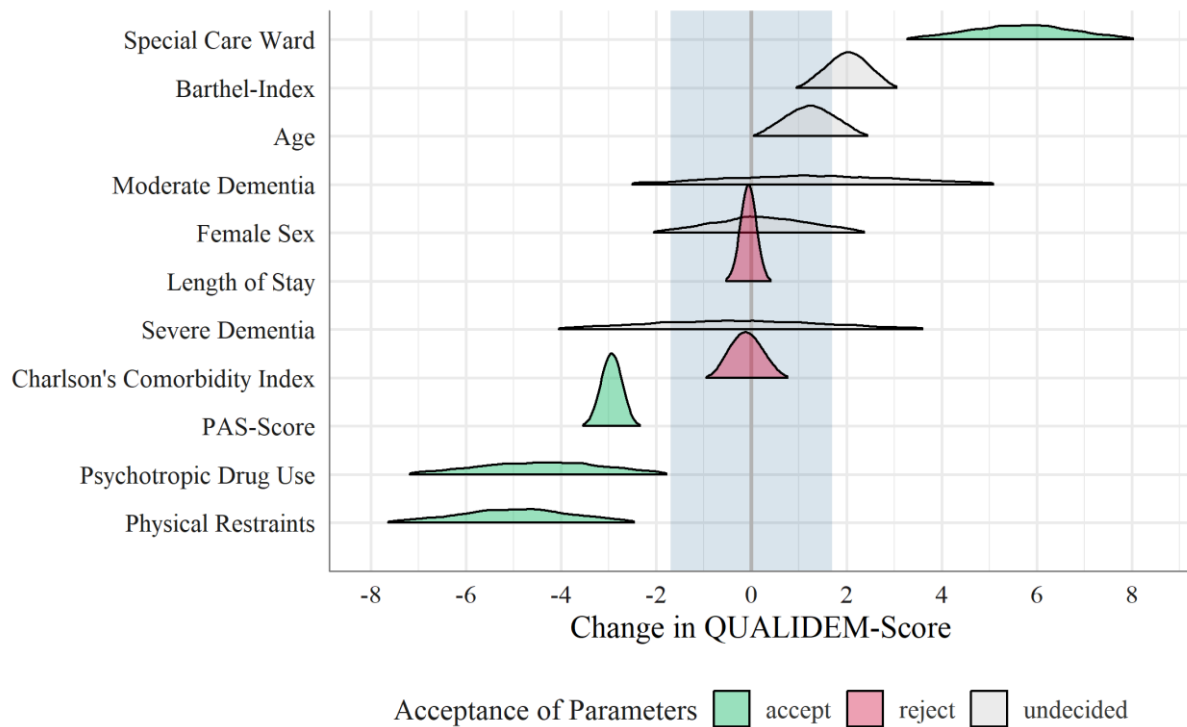

### 5. Summary of the Distribution of Prior and Posterior Samples

Bayesian regression models can incorporate prior information about the parameters. Informative or weakly informative priors have the advantage of regularization of parameters to rule out large effects. This leads to less biased results and reductions of outliers in situations where the sample size in general, or for certain groups in the data, is small. Where we found information about our parameters, we included it by specifying *informative priors*. For instance, studies suggest that physical restraints are, on average, associated with an about 5-point reduction in quality of life, so the *location* of the prior distribution of our parameter physical restraint is at -5.0 (see Table S2). *Weakly informative priors* simply have a location of zero.

**Table S2: Prior Summary**

| Predictor                    | Location | Scale |
|------------------------------|----------|-------|
| Length of Stay               | 0.00     | 6     |
| Age                          | 0.16     | 40    |
| Moderate dementia            | 0.00     | 42    |
| Severe dementia              | -0.44    | 42    |
| Sex, female                  | -3.22    | 42    |
| Barthel-Score                | 0.00     | 29    |
| Physical restraints          | -5.00    | 42    |
| Special Care Ward            | 0.00     | 42    |
| PAS-Score                    | 0.00     | 13    |
| Charlson's Comorbidity Index | 0.00     | 27    |
| Psychotic Drug Use           | 0.29     | 42    |

To prevent a too strong shrinkage of uncertainty, the *scale* of the prior distribution should be large enough. If no assumptions about the scale of the effect are made, a recommended way (for normally distributed priors) is to use a scale of 2.5 and adjust it by dividing the scale by the standard deviation of the related predictor and multiply it with the standard deviation of the outcome ( $2.5 * SD(y) / SD(x)$ , see <https://cran.r-project.org/web/packages/rstanarm/vignettes/priors.html>).

When the evidence in the data is *strong*, the impact of the prior information is rather low. On the other hand, if the evidence of the data is *weak*, for instance due to small sample size, the impact of the prior information increases. Figure S3 shows the summary of the prior and posterior sample distributions and suggests that the evidence in the data was rather strong and results were not biased due to unrealistic prior information.

**Figure S3: Posterior versus Prior Summary**

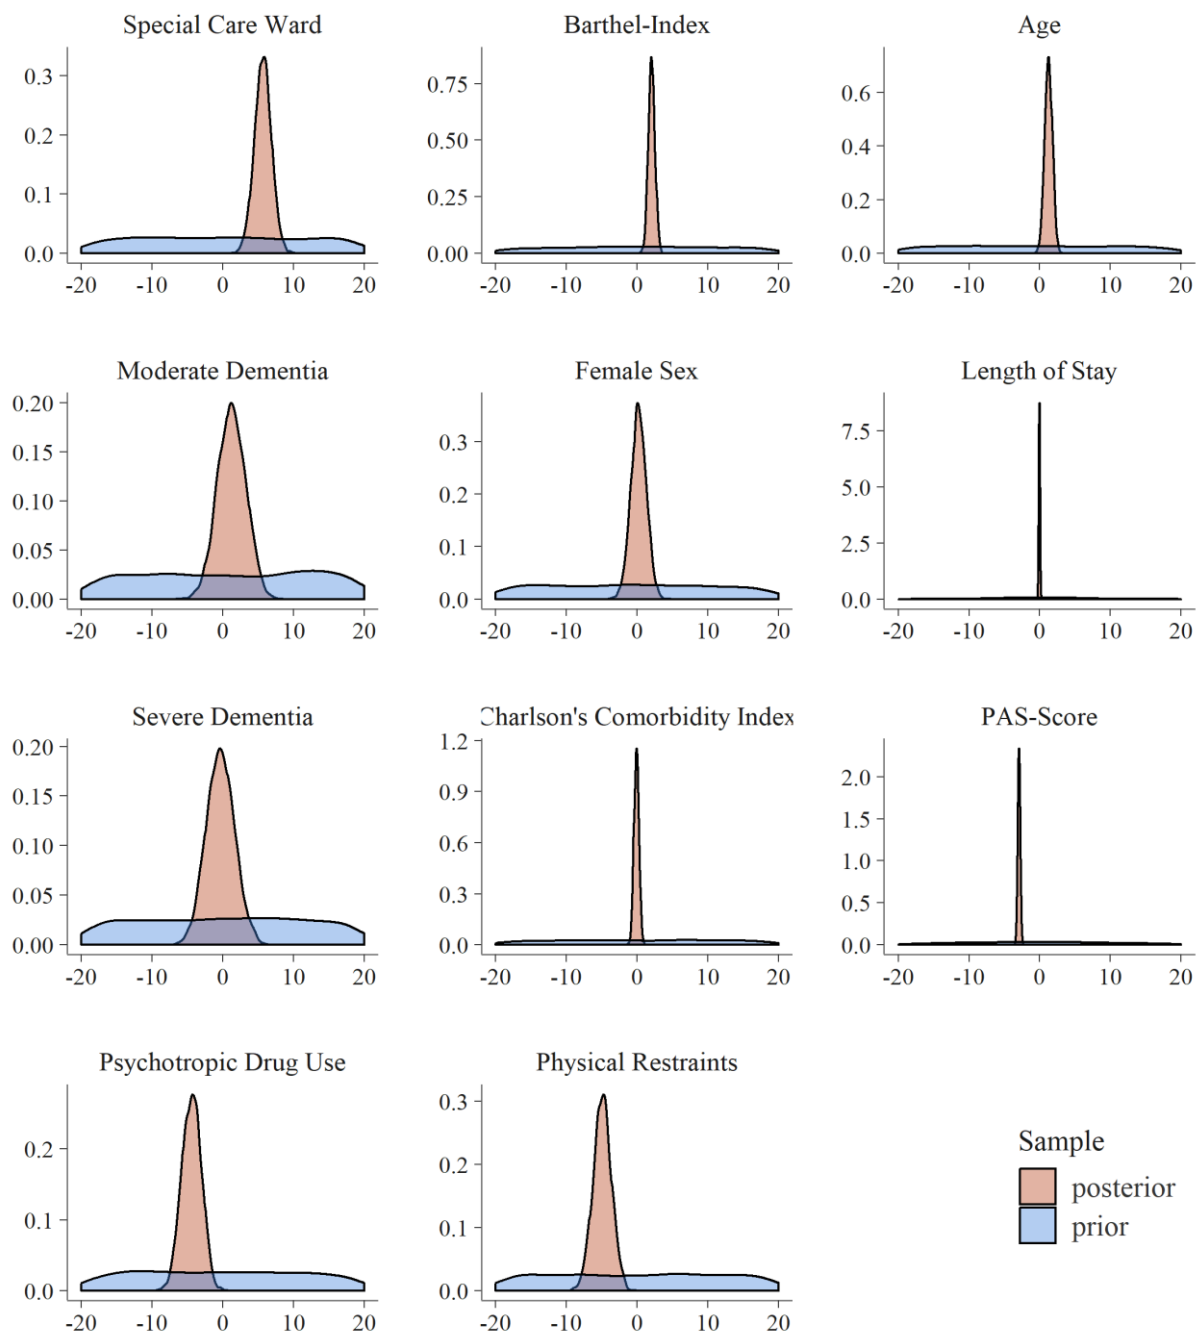

## 6. Trace plots

A trace plot provides a visual way to inspect sampling the behaviour and can be used, besides the Rhat-statistics, to assess convergence. The desired pattern is a “fat, hairy caterpillar”, which shows no suspicious bends<sup>4, 5</sup>. If the chains converged to the posterior distribution, we can be confident in our model-based inferences.

The trace plot in Figure S4 indicates that all chains have converged well.

**Figure S4:** Markov Chain trace plot, 4 chains with 1000 iterations each (excluding warmup-samples)

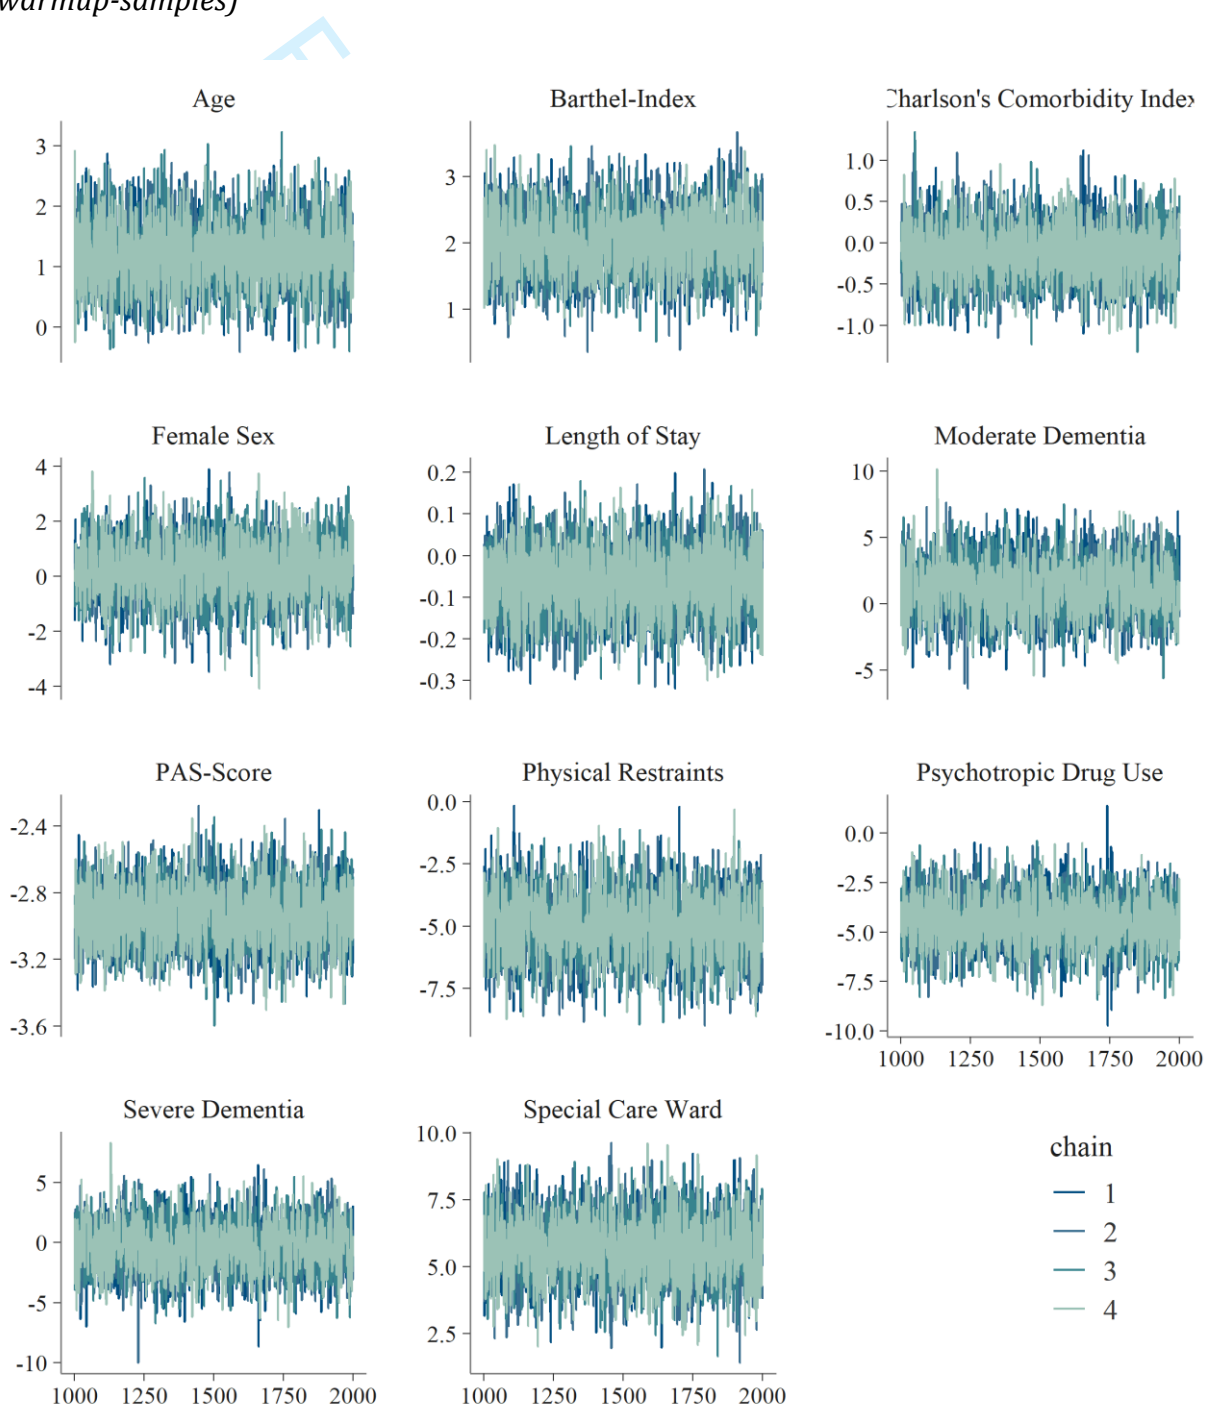

## 7. References

1. Gelman A, Carlin JB, Stern HS, Dunson DB, Vehtari A, Rubin DB. Bayesian Data Analysis. Third edition. Boca Raton: CRC Press; 2014: p.24
2. Gelman A, Rubin DB. Inference from Iterative Simulation Using Multiple Sequences. *Statistical Science*. 1992;7(4):457-472. doi:10.1214/ss/1177011136
3. Kruschke JK. Rejecting or Accepting Parameter Values in Bayesian Estimation. *Advances in Methods and Practices in Psychological Science*. 2018; doi: 10.1177/2515245918771304
4. Sorensen T, Hohenstein S, Vasishth S. Bayesian linear mixed models using Stan: A tutorial for psychologists, linguists, and cognitive scientists. *The Quantitative Methods for Psychology*. 2016;12:175–200.
5. Lunn D, Jackson C, Best N, Thomas A, Spiegelhalter D. The BUGS book: a practical introduction to Bayesian analysis. Boca Raton, FL: CRC Press, Taylor & Francis Group; 2013.



## Supplemental Material 2

To see if the complexity of patients' needs affect our findings, we calculated regression models with interaction terms between need factors moderated by hospitals. The figures S5 to S8 show the results of the interaction terms. Table S3 shows the coefficients in details. We found no "significant" associations for the interaction terms, concluding that the association between complexity of patients' needs and quality of life is not differing noticeably between the intervention and control group.

Plots were created using the *ggeffects* package in R (Lüdtke D. *ggeffects*: Tidy Data Frames of Marginal Effects from Regression Models. *Journal of Open Source Software*. 2018;3: 772. doi:10.21105/joss.00772).

**Figure S5:** Interaction between Barthel-Index and Intervention/Control-Group

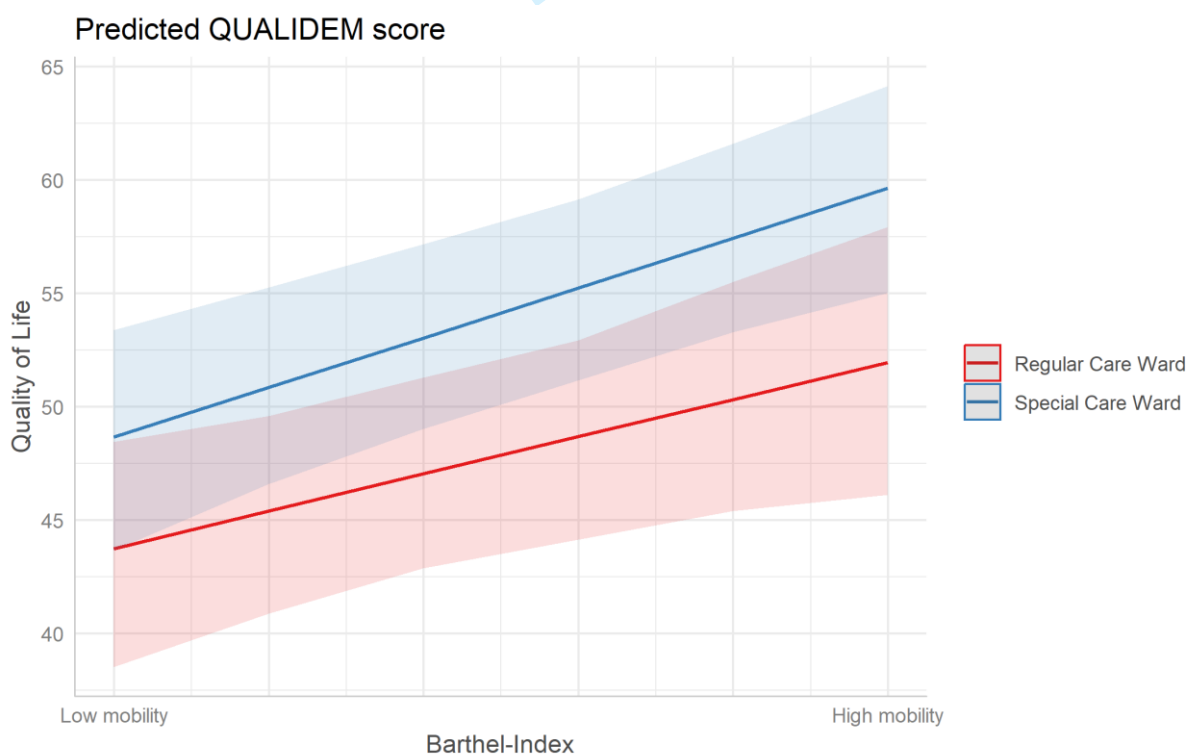

**Figure S6:** Interaction between Physical Restraints and Intervention/Control-Group

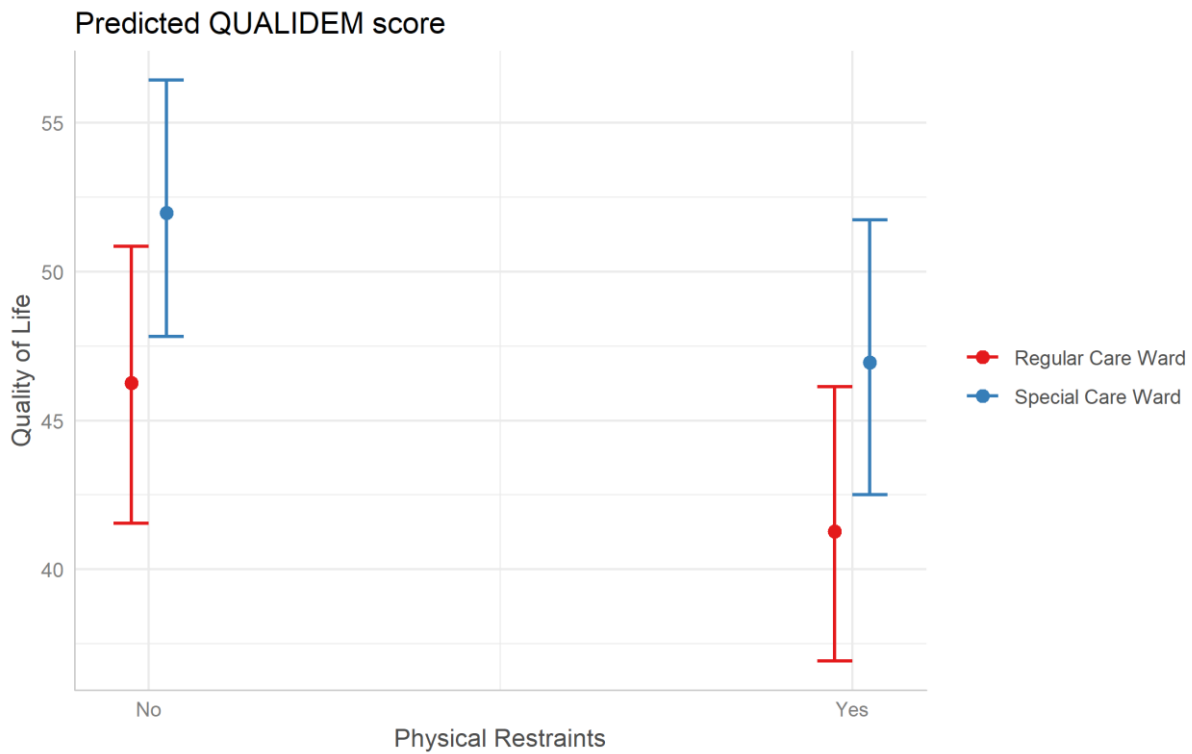

**Figure S7:** Interaction between PAS and Intervention/Control-Group

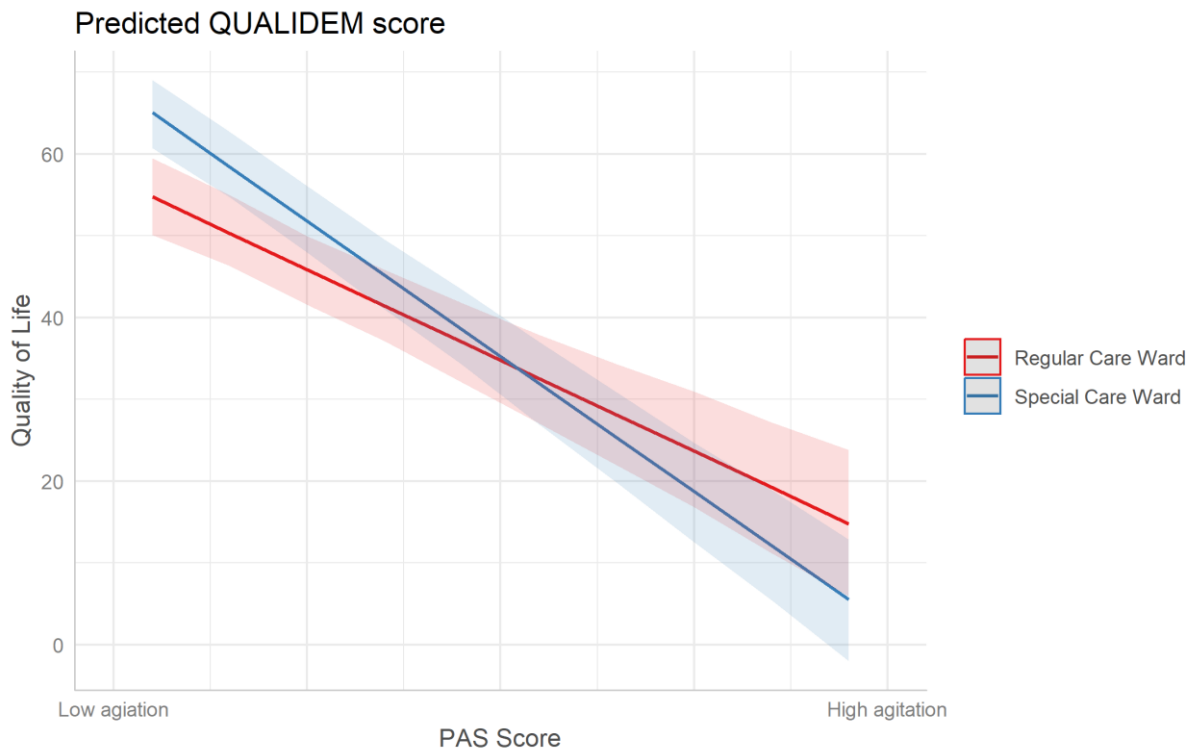

**Figure S8:** Interaction between Chemical Restraints and Intervention/Control-Group

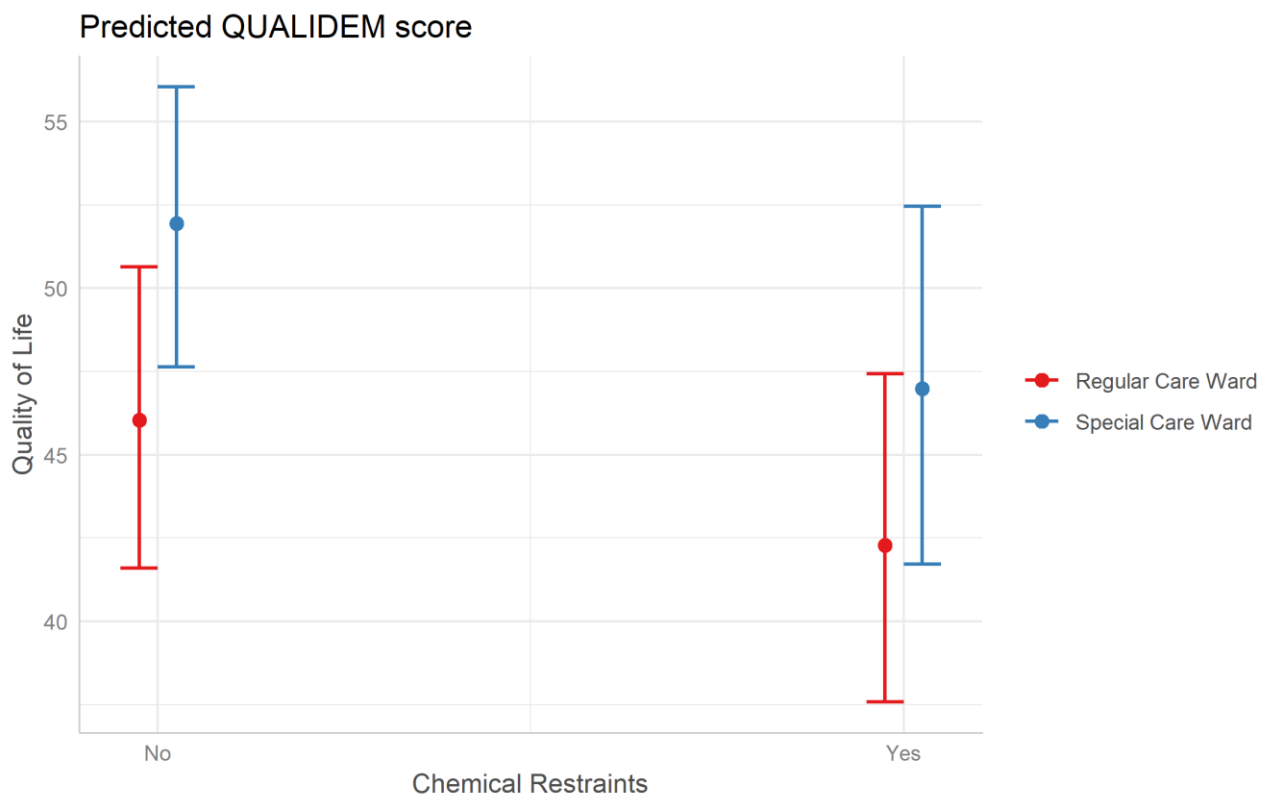

review only

**Table S3: Coefficients for Models with Interaction Terms**

| Terms                                  | Model: Interaction between Barthel and Hospital |               | Model: Interaction between Physical Restraints and Hospital |               | Model: Interaction between PAS and Hospital |               | Model: Interaction between Chemical Restraints and Hospital |               |
|----------------------------------------|-------------------------------------------------|---------------|-------------------------------------------------------------|---------------|---------------------------------------------|---------------|-------------------------------------------------------------|---------------|
|                                        | Estimates                                       | HDI (95%)     | Estimates                                                   | HDI (95%)     | Estimates                                   | HDI (95%)     | Estimates                                                   | HDI (95%)     |
| (Intercept)                            | 36.18                                           | 26.19 – 45.67 | 36.31                                                       | 27.00 – 46.10 | 36.57                                       | 27.11 – 45.71 | 36.16                                                       | 26.45 – 45.69 |
| Length of Stay                         | -0.07                                           | -0.23 – 0.11  | -0.06                                                       | -0.23 – 0.09  | -0.07                                       | -0.23 – 0.10  | -0.06                                                       | -0.22 – 0.10  |
| Age                                    | 0.12                                            | 0.01 – 0.23   | 0.12                                                        | 0.02 – 0.23   | 0.12                                        | 0.01 – 0.22   | 0.12                                                        | 0.02 – 0.23   |
| Moderate Dementia                      | 1.21                                            | -2.79 – 5.13  | 1.19                                                        | -2.72 – 5.24  | 1.19                                        | -2.83 – 4.72  | 1.25                                                        | -2.95 – 4.89  |
| Severe Dementia                        | -0.34                                           | -4.30 – 3.70  | -0.44                                                       | -4.45 – 3.65  | -0.74                                       | -4.54 – 3.10  | -0.30                                                       | -4.45 – 3.59  |
| Female                                 | 0.16                                            | -2.06 – 2.29  | 0.19                                                        | -1.98 – 2.29  | 0.52                                        | -1.53 – 2.70  | 0.23                                                        | -1.76 – 2.53  |
| Charlson's Comorbidity Index           | -0.12                                           | -0.81 – 0.59  | -0.11                                                       | -0.77 – 0.64  | -0.11                                       | -0.77 – 0.59  | -0.11                                                       | -0.82 – 0.59  |
| Barthel Score                          | 1.66                                            | 0.27 – 2.99   | 2.02                                                        | 1.15 – 2.88   | 2.07                                        | 1.17 – 2.97   | 2.05                                                        | 1.13 – 2.98   |
| Physical Restraints (yes)              | 5.74                                            | 3.48 – 7.90   | 5.76                                                        | 2.67 – 8.72   | 5.95                                        | 3.64 – 8.18   | 5.94                                                        | 3.44 – 8.62   |
| Special Care Ward (Intervention)       | -5.02                                           | -7.65 – -2.54 | -4.92                                                       | -8.57 – -1.11 | -4.94                                       | -7.60 – -2.41 | -4.96                                                       | -7.83 – -2.58 |
| PAS-Score                              | -2.96                                           | -3.30 – -2.62 | -2.94                                                       | -3.30 – -2.61 | -2.22                                       | -2.77 – -1.66 | -2.93                                                       | -3.27 – -2.59 |
| Psychotropic Drug Use (yes, as-needed) | -4.43                                           | -7.10 – -1.83 | -4.40                                                       | -7.08 – -1.87 | -4.30                                       | -6.81 – -1.56 | -3.76                                                       | -7.83 – -0.03 |
| Barthel * Intervention                 | 0.52                                            | -1.00 – 2.06  |                                                             |               |                                             |               |                                                             |               |
| Phys. Restr. * Intervention            |                                                 |               | -0.09                                                       | -4.46 – 4.66  |                                             |               |                                                             |               |
| PAS * Intervention                     |                                                 |               |                                                             |               | -1.09                                       | -1.76 – -0.42 |                                                             |               |
| Chem. Restr. * Intervention            |                                                 |               |                                                             |               |                                             |               | -1.15                                                       | -6.63 – 4.27  |

## Supplemental Material 3 – R Source Code

```

1
2 library(tidyverse)
3 library(gggridges)
4 library(sjmisc)
5 library(sjlabelled)
6 library(sjstats)
7 library(sjPlot)
8 library(brms)
9
10 # Data available at https://doi.org/10.5281/zenodo.1479676
11
12 # load data ----
13 load("Dataset.RData")
14
15 # divide age by 10
16 d$age10 <- d$age / 10
17
18 # Labels for final model ----
19
20 labs <-
21   c(
22     stay_c = "Length of Stay",
23     age = "Age",
24     age10 = "Age",
25     mmse2 = "Moderate Dementia",
26     mmse3 = "Severe Dementia",
27     sex2 = "Female Sex",
28     barthel_code = "Barthel-Index",
29     groupintervention = "Special Care Ward",
30     physres1 = "Physical Restraints",
31     pas_c = "PAS-Score",
32     cci_c = "Charlson's Comorbidity Index",
33     chemicalres1 = "Psychotropic Drug Use", # oder as-needed
34     b_stay_c = "Length of Stay",
35     b_age = "Age",
36     b_age10 = "Age",
37     b_mmse2 = "Moderate Dementia",
38     b_mmse3 = "Severe Dementia",
39     b_sex2 = "Female Sex",
40     b_barthel_code = "Barthel-Index",
41     b_groupintervention = "Special Care Ward",
42     b_physres1 = "Physical Restraints",
43     b_pas_c = "PAS-Score",
44     b_cci_c = "Charlson's Comorbidity Index",
45     b_chemicalres1 = "Psychotropic Drug Use" # oder as-needed
46   )
47
48 # prior-definition in brms ----
49
50 # scale is 2.5 * sd(y) / sd(x)
51
52 bprior <-
53   prior(normal(0, 6), class = "b", coef = "stay_c") +
54   prior(normal(.1554, 40), class = "b", coef = "age10") +
55   prior(normal(0, 42), class = "b", coef = "mmse2") +
56   prior(normal(-.444, 42), class = "b", coef = "mmse3") +
57   prior(normal(-3.219, 42), class = "b", coef = "sex2") +
58   prior(normal(0, 29), class = "b", coef = "barthel_code") +
59   prior(normal(-5, 42), class = "b", coef = "physres1") +
60   prior(normal(0, 42), class = "b", coef = "groupintervention") +
61   prior(normal(0, 13), class = "b", coef = "pas_c") +
62   prior(normal(.2925, 42), class = "b", coef = "chemicalres1") +
63   prior(normal(0, 26.77), class = "b", coef = "cci_c")
64
65 # see:
66 # Beerens HC, Sutcliffe C, Renom-Guiteras A, et al. Quality of Life and
67 # Quality of Care for People With Dementia Receiving Long Term Institutional
68 # Care or Professional Home Care: The European RightTimePlaceCare Study.
69 # Journal of the American Medical Directors Association. 2014;15(1):54-61.
70 # doi:10.1016/j.jamda.2013.09.010

```

```

#
1 # QoL-Scale ranges from 13-52 (40 points). Effects from those study are
2 # multiplied by 2.5 (rescaling 40-points to 100-point-scale of QUALIDEM)
3
4 # see:
5 # Barca, M. L., Engedal, K., Laks, J., & Selbæk, G. (2011). Quality of Life
6 # among Elderly Patients with Dementia in Institutions. Dementia and Geriatric
7 # Cognitive Disorders, 31(6), 435-442. https://doi.org/10.1159/000328969
8
9 # QoL-scale ranges from 11-55 (45 points). Effects from those study are
10 # multiplied by 2.2 (rescaling 45-points to 100-point-scale of QUALIDEM)
11
12 # model formula ----
13 mf <-
14   formula(
15     QoL ~ stay_c + age10 + mmse + sex + cci_c +
16     barthel_code + physres + group + pas_c +
17     chemicalres + (1 | maindiag)
18   )
19
20 # brms-model ----
21 set.seed(1207)
22
23 m2a <- brm(
24   formula = mf,
25   data = d,
26   prior = bprior,
27   sample_prior = TRUE
28 )
29
30 # Figure 3 ----
31 theme_set(theme_sjplot2(base_size = 14, base_family = "serif"))
32
33 p <- plot_model(
34   m2a,
35   title = "",
36   axis.labels = labs,
37   sort.est = T,
38   colors = c("grey30"),
39   axis.title = "Change in QUALIDEM-Score",
40   wrap.title = 100,
41   wrap.labels = 20,
42   width = .2,
43   grid.breaks = 2,
44   size.inner = .1
45 ) +
46   ylab("Change in QUALIDEM Total Score") +
47   theme_sjplot2(base_size = 14, base_family = "serif")
48
49 p_pdf <- p + theme_sjplot2(base_size = 28, base_family = "serif")
50
51 ggsave(
52   filename = "Fig3.tiff", plot = p, width = 170, height = 120, units = "mm",
53   dpi = 300, compression = "lzw"
54 )
55
56 ggsave(
57   filename = "Fig3.pdf", scale = 2, plot = p_pdf, width = 170, height = 120,
58   units = "mm", dpi = 300
59 )
60
61 # Appendix S1: Test for practical equivalence ----
62
63 rope(m2a, rope = c(-6, 6))
64 rope(m2a, rope = c(-7.5, 7.5))
65
66 equi_test(m2a)

```

```

# Appendix S1, Table Regression Coefficients ----
1
2 tab_df(tidy_stan(m2a, prob = c(.5, .89), digits = 1))
3
4 # Appendix S1, Prior Adjustement ----
5
6 ps <- prior_summary(m2a)
7 ps
8
9 # Appendix S1, Figure distribution Posterior Samples ----
10
11 tmp <- m2a %>%
12   as_tibble() %>%
13   select(2:12) %>%
14   gather(key = "predictor", value = "estimate") %>%
15   to_factor(predictor)
16
17 tmp$predictor <- lvl_reorder(tmp$predictor, c(9, 4, 8, 3, 7, 11, 10, 6, 1, 2, 5))
18
19 p2 <- ggplot(tmp, aes(x = estimate, y = predictor)) +
20   geom_vline(xintercept = 0, colour = "grey70", size = .8) +
21   geom_density_ridges2(rel_min_height = 0.001, scale = 2, alpha = .5) +
22   scale_x_continuous(breaks = seq(-8, 8, 2)) +
23   scale_y_discrete(labels = labs) +
24   labs(x = "Change in QUALIDEM-Score", y = NULL) +
25   theme_sjplot2(base_size = 14, base_family = "serif")
26
27 ggsave(filename = "FigS1.tiff", plot = p2, width = 190, height = 120, units = "mm", dpi = 300)
28
29 # Appendix S1, test for practical equivalence ----
30
31 ## Short version
32
33 equi_test(m2a, out = "plot")
34
35 ## More beautiful tweaked version
36
37 tmp.hdi <- hdi(m2a, prob = .95) %>%
38   slice(c(-1, -13))
39
40 tmp2 <- m2a %>%
41   as_tibble() %>%
42   select(2:12) %>%
43   map2_df(tmp.hdi$hdi.low, function(x, y) {
44     x[x < y] <- NA
45     x
46   }) %>%
47   map2_df(tmp.hdi$hdi.high, function(x, y) {
48     x[x > y] <- NA
49     x
50   }) %>%
51   gather(key = "predictor", value = "estimate") %>%
52   to_factor(predictor)
53
54 tmp2$predictor <- lvl_reorder(tmp2$predictor, c(9, 4, 8, 3, 7, 11, 10, 6, 1, 2, 5))
55
56 tmp2$grp <- dplyr::case_when(
57   tmp2$predictor %in% c("b_stay_c", "b_cci_c") ~ "reject",
58   tmp2$predictor %in% c("b_age10", "b_mmse2", "b_mmse3", "b_sex2", "b_barthel_code") ~
59   "undecided",
60   TRUE ~ "accept"
61 )
62
63 p3 <- ggplot(tmp2, aes(x = estimate, y = predictor, fill = grp)) +
64   # rope based on "equi_test(model)".
65   annotate("rect", xmin = -1.7, xmax = 1.7, ymin = 0, ymax = Inf, fill = sjplot_pal(palette =
66   "us")[1], alpha = 0.15) +
67   geom_vline(xintercept = 0, colour = "grey70", size = .8) +
68   geom_density_ridges2(rel_min_height = 0.01, scale = 2, alpha = .4) +
69   scale_x_continuous(breaks = seq(-8, 8, 2)) +
70   scale_y_discrete(labels = labs) +
71   scale_fill_manual(values = sjplot_pal()[c(3, 1, 7)]) +

```

```

1 labs(x = "Change in QUALIDEM-Score", y = NULL, fill = "Acceptance of Parameters") +
2 theme_sjplot2(base_size = 14, base_family = "serif") +
3 theme(
4   legend.title = element_text(size = 13),
5   legend.position = "bottom",
6   axis.line.x = element_line(colour = "grey50"),
7   axis.line.y = element_line(colour = "grey50")
8 )
9
10 ggsave(filename = "FigS2.tiff", plot = p3, width = 190, height = 120, units = "mm", dpi = 300)
11
12 # Appendix S1, Posterior-Prior-Check ----
13 ## Short version
14 plot_model(m2a, type = "diag", axis.lim = c(-20, 20))
15 ## More beautiful tweaked version
16
17 pr_samp <- prior_samples(m2a) %>%
18   select(starts_with("b_")) %>%
19   gather(key = "Term", value = "Estimate") %>%
20   mutate(Sample = "prior")
21
22 ps_samp <- posterior_samples(m2a) %>%
23   select(starts_with("b_"), -b_Intercept) %>%
24   gather(key = "Term", value = "Estimate") %>%
25   mutate(Sample = "posterior")
26
27 m_pp_data <- bind_rows(pr_samp, ps_samp) %>% to_factor(Term)
28 m_pp_data$Term <- lvls_reorder(m_pp_data$Term, rev(c(8, 3, 10, 4, 7, 5, 11, 6, 1, 2, 9)))
29
30 p4 <- ggplot(m_pp_data, aes(x = Estimate, fill = Sample)) +
31   geom_density(alpha = .4) +
32   scale_x_continuous(limits = c(-20, 20)) +
33   facet_wrap(
34     ~ Term,
35     scales = "free",
36     labeller = labeller(Term = labs),
37     nrow = 4
38   ) +
39   labs(x = NULL, y = NULL) +
40   bayesplot::theme_default(base_size = 13) +
41   theme(
42     axis.line.x = element_line(colour = "grey50"),
43     axis.line.y = element_line(colour = "grey50"),
44     axis.text = element_text(colour = "grey10"),
45     axis.title = element_text(colour = "black"),
46     # strip.background = element_rect(colour = "grey50", fill = "grey90"),
47     # strip.text = element_text(colour = "grey20"),
48     legend.title = element_text(colour = "grey10"),
49     legend.text = element_text(colour = "grey20"),
50     legend.position = c(.5, .15),
51     legend.justification = c(-2, 1)
52   ) +
53   scale_fill_manual(values = sjplot_pal("breakfast club")[c(1, 3)])
54
55 ggsave(filename = "FigS3.tiff", plot = p4, width = 190, height = 214, units = "mm", dpi = 300)
56
57 # Appendix S1, Traceplot ----
58
59 p <- rstan::traceplot(m2a$fit, pars = colnames(as.data.frame(m2a))[1:12], inc_warmup = F)
60 p$data$parameter <- as.character(p$data$parameter)
61 tmp <- p$data %>%
62   filter(parameter != "b_Intercept")
63
64 for (i in 1:length(labs)) {
65   if (names(labs)[i] %in% tmp$parameter) {
66     r <- which(tmp$parameter == names(labs)[i])
67     tmp$parameter[r] <- labs[i]
68   }
69 }

```



```
p5 <- ggplot(tmp, aes(x = iteration, y = value, colour = chain)) +
1 geom_line() +
2 facet_wrap(~parameter, scales = "free_y", ncol = 3) +
3 scale_color_manual(values = sjplot_pal("us", n = 4)) +
4 labs(x = NULL, y = NULL) +
5 bayesplot::theme_default(base_size = 13) +
6 theme(
7   axis.line.x       = element_line(colour = "grey50"),
8   axis.line.y       = element_line(colour = "grey50"),
9   axis.text         = element_text(colour = "grey10"),
10  axis.title        = element_text(colour = "black"),
11  # strip.background = element_rect(colour = "grey50", fill = "grey90"),
12  # strip.text       = element_text(colour = "grey20"),
13  legend.title      = element_text(colour = "grey10"),
14  legend.text       = element_text(colour = "grey20"),
15  legend.position   = c(.5, .15),
16  legend.justification = c(-4.2, 0.7)
17 )
18
19 ggsave(filename = "FigS4.tiff", compress = "lzw", plot = p5, width = 190, height = 214, units =
20 "mm", dpi = 300)
21
22
23
24
25
26
27
28
29
30
31
32
33
34
35
36
37
38
39
40
41
42
43
44
45
46
47
48
49
50
51
52
53
54
55
56
57
58
59
60
```

**STROBE 2007 (v4) Statement—Checklist of items that should be included in reports of *case-control studies***

| Section/Topic                | Item # | Recommendation                                                                                                                                                                       | Reported on page # |
|------------------------------|--------|--------------------------------------------------------------------------------------------------------------------------------------------------------------------------------------|--------------------|
| Title and abstract           | 1      | (a) Indicate the study's design with a commonly used term in the title or the abstract                                                                                               | 1                  |
|                              |        | (b) Provide in the abstract an informative and balanced summary of what was done and what was found                                                                                  | 2                  |
| <b>Introduction</b>          |        |                                                                                                                                                                                      |                    |
| Background/rationale         | 2      | Explain the scientific background and rationale for the investigation being reported                                                                                                 | 4                  |
| Objectives                   | 3      | State specific objectives, including any prespecified hypotheses                                                                                                                     | 4-5                |
| <b>Methods</b>               |        |                                                                                                                                                                                      |                    |
| Study design                 | 4      | Present key elements of study design early in the paper                                                                                                                              | 5                  |
| Setting                      | 5      | Describe the setting, locations, and relevant dates, including periods of recruitment, exposure, follow-up, and data collection                                                      | 6-7                |
| Participants                 | 6      | (a) Give the eligibility criteria, and the sources and methods of case ascertainment and control selection. Give the rationale for the choice of cases and controls                  | 6-7                |
|                              |        | (b) For matched studies, give matching criteria and the number of controls per case                                                                                                  |                    |
| Variables                    | 7      | Clearly define all outcomes, exposures, predictors, potential confounders, and effect modifiers. Give diagnostic criteria, if applicable                                             | 8-10               |
| Data sources/<br>measurement | 8*     | For each variable of interest, give sources of data and details of methods of assessment (measurement). Describe comparability of assessment methods if there is more than one group | 8-10               |
| Bias                         | 9      | Describe any efforts to address potential sources of bias                                                                                                                            | 10                 |
| Study size                   | 10     | Explain how the study size was arrived at                                                                                                                                            | 7                  |
| Quantitative variables       | 11     | Explain how quantitative variables were handled in the analyses. If applicable, describe which groupings were chosen and why                                                         | 10-11              |
| Statistical methods          | 12     | (a) Describe all statistical methods, including those used to control for confounding                                                                                                | 10-11              |
|                              |        | (b) Describe any methods used to examine subgroups and interactions                                                                                                                  | 10-11              |
|                              |        | (c) Explain how missing data were addressed                                                                                                                                          | 10                 |
|                              |        | (d) If applicable, explain how matching of cases and controls was addressed                                                                                                          | N/A                |
|                              |        | (e) Describe any sensitivity analyses                                                                                                                                                | N/A                |
| <b>Results</b>               |        |                                                                                                                                                                                      |                    |

|                          |     |                                                                                                                                                                                                              |       |
|--------------------------|-----|--------------------------------------------------------------------------------------------------------------------------------------------------------------------------------------------------------------|-------|
| Participants             | 13* | (a) Report numbers of individuals at each stage of study—eg numbers potentially eligible, examined for eligibility, confirmed eligible, included in the study, completing follow-up, and analysed            | 12    |
|                          |     | (b) Give reasons for non-participation at each stage                                                                                                                                                         | N/A   |
|                          |     | (c) Consider use of a flow diagram                                                                                                                                                                           | N/A   |
| Descriptive data         | 14* | (a) Give characteristics of study participants (eg demographic, clinical, social) and information on exposures and potential confounders                                                                     | 12-13 |
|                          |     | (b) Indicate number of participants with missing data for each variable of interest                                                                                                                          | 12-13 |
| Outcome data             | 15* | Report numbers in each exposure category, or summary measures of exposure                                                                                                                                    | 12-13 |
| Main results             | 16  | (a) Give unadjusted estimates and, if applicable, confounder-adjusted estimates and their precision (eg, 95% confidence interval). Make clear which confounders were adjusted for and why they were included | 13-14 |
|                          |     | (b) Report category boundaries when continuous variables were categorized                                                                                                                                    | N/A   |
|                          |     | (c) If relevant, consider translating estimates of relative risk into absolute risk for a meaningful time period                                                                                             | N/A   |
| Other analyses           | 17  | Report other analyses done—eg analyses of subgroups and interactions, and sensitivity analyses                                                                                                               | N/A   |
| <b>Discussion</b>        |     |                                                                                                                                                                                                              |       |
| Key results              | 18  | Summarise key results with reference to study objectives                                                                                                                                                     | 15-16 |
| Limitations              | 19  | Discuss limitations of the study, taking into account sources of potential bias or imprecision. Discuss both direction and magnitude of any potential bias                                                   | 17-18 |
| Interpretation           | 20  | Give a cautious overall interpretation of results considering objectives, limitations, multiplicity of analyses, results from similar studies, and other relevant evidence                                   | 15-18 |
| Generalisability         | 21  | Discuss the generalisability (external validity) of the study results                                                                                                                                        | 18-19 |
| <b>Other information</b> |     |                                                                                                                                                                                                              |       |
| Funding                  | 22  | Give the source of funding and the role of the funders for the present study and, if applicable, for the original study on which the present article is based                                                | 20    |

\*Give information separately for cases and controls in case-control studies and, if applicable, for exposed and unexposed groups in cohort and cross-sectional studies.

**Note:** An Explanation and Elaboration article discusses each checklist item and gives methodological background and published examples of transparent reporting. The STROBE checklist is best used in conjunction with this article (freely available on the Web sites of PLoS Medicine at <http://www.plosmedicine.org/>, Annals of Internal Medicine at <http://www.annals.org/>, and Epidemiology at <http://www.epidem.com/>). Information on the STROBE Initiative is available at [www.strobe-statement.org](http://www.strobe-statement.org).

# BMJ Open

## Quality of Life of Patients with Dementia in Acute Hospitals: A non-randomised case-control-study comparing a regular ward to a special care ward with dementia care concept.

|                                 |                                                                                                                                                                                                                                                                                                                                                         |
|---------------------------------|---------------------------------------------------------------------------------------------------------------------------------------------------------------------------------------------------------------------------------------------------------------------------------------------------------------------------------------------------------|
| Journal:                        | <i>BMJ Open</i>                                                                                                                                                                                                                                                                                                                                         |
| Manuscript ID                   | bmjopen-2019-030743.R1                                                                                                                                                                                                                                                                                                                                  |
| Article Type:                   | Research                                                                                                                                                                                                                                                                                                                                                |
| Date Submitted by the Author:   | 26-Jun-2019                                                                                                                                                                                                                                                                                                                                             |
| Complete List of Authors:       | Lüdecke, Daniel; University Medical Center Hamburg-Eppendorf, Department of Medical Sociology<br>Poppele, Georg; Evangelisches Krankenhaus Alsterdorf<br>Klein, Jens; University Medical Center Hamburg-Eppendorf, Department of Medical Sociology<br>Kofahl, Christopher; University Medical Center Hamburg-Eppendorf, Department of Medical Sociology |
| <b>Primary Subject Heading</b>: | Patient-centred medicine                                                                                                                                                                                                                                                                                                                                |
| Secondary Subject Heading:      | Health services research, Nursing                                                                                                                                                                                                                                                                                                                       |
| Keywords:                       | Dementia < NEUROLOGY, Quality of Life, Acute Hospital, Quality of Care, INTERNAL MEDICINE                                                                                                                                                                                                                                                               |
|                                 |                                                                                                                                                                                                                                                                                                                                                         |

SCHOLARONE™  
Manuscripts

**Title**

Quality of Life of Patients with Dementia in Acute Hospitals: A non-randomised case-control-study comparing a regular ward to a special care ward with dementia care concept.

**Authors**

Daniel Lüdecke, Georg Poppele, Jens Klein, Christopher Kofahl

**Corresponding author**

Daniel Lüdecke

Department of Medical Sociology

University Medical Center Hamburg-Eppendorf

Martinistr. 52

20246 Hamburg

Germany

Email: [d.luedecke@uke.de](mailto:d.luedecke@uke.de)

ORCID iD: 0000-0002-8895-3206

Tel.: ++49 40 7410 52878

**Co-authors**

Georg Poppele, Evangelisches Krankenhaus Alsterdorf (Protestant Hospital Alsterdorf), Hamburg, Germany

Jens Klein, University Medical Center Hamburg-Eppendorf, Department of Medical Sociology, Hamburg, Germany

Christopher Kofahl, University Medical Center Hamburg-Eppendorf, Department of Medical Sociology, Hamburg, Germany

**Keywords**

Dementia, Quality of Life, Acute Hospital, Quality of Care, Internal Medicine

1  
2  
3 **Word Count:** 5.095 (excluding title page, abstract, strength and limitations, references,  
4 tables)  
5  
6  
7  
8  
9  
10  
11  
12  
13  
14  
15  
16  
17  
18  
19  
20  
21  
22  
23  
24  
25  
26  
27  
28  
29  
30  
31  
32  
33  
34  
35  
36  
37  
38  
39  
40  
41  
42  
43  
44  
45  
46  
47  
48  
49  
50  
51  
52  
53  
54  
55  
56  
57  
58  
59  
60

For peer review only

## Abstract

**Objectives:** To identify factors that predict the quality of life (QoL) of patients with dementia in acute hospitals and to analyse if a special care concept can increase the patients' QoL.

**Design:** A non-randomised case-control-study, including two internal medicine wards from hospitals in Hamburg, Germany.

**Setting and Participants:** In all, 526 patients with dementia from two hospitals were included in the study (intervention: n=333; control: n=193). Inclusion criteria was an at least mild cognitive impairment or dementia. The intervention group was a hospital with a special care ward for internal medicine focussing on patients with dementia. The control group was from a hospital with a regular care ward without special dementia care concept.

**Outcome Measures:** Our main outcome was the QoL (range 0-100) from patients with dementia in two different hospitals. A Bayesian multilevel analysis was conducted to identify predictors like age, dementia, agitation, physical and chemical restraints or functional limitations that affect QoL.

**Results:** QoL differs significantly between the control (40.7) and intervention group (51.2),  $p < 0.001$ . Regression analysis suggests that physical restraint (estimated effect: -5.0), psychotropic drugs use (-4.4) and agitation (-2.9) are negatively associated with QoL. After controlling for confounders, the positive effect of the special care concept remained (5.7).

**Conclusions:** A special care ward will improve the quality of care and has a positive impact on the QoL of patients with dementia. Health policies should consider the benefits of special care concepts and develop incentives for hospitals to improve the QoL and quality of care for these patients.

## Article Summary

### Strengths and Limitations

- This is one of the first studies to investigate quality of life of patients with dementia in acute internal medicine wards in Germany.
- The statistical method applied in this study explicitly incorporates and accounts for information and knowledge from previous research.
- There are no studies which have evaluated the reliability and validity for the use of the assessment instrument for our main outcome (quality of life) in hospitals settings.
- The structural differences between the hospitals from the control and intervention may limit the generalizability of the results regarding the benefit of special care concepts for regular internal medicine wards.



## Introduction

Acute hospitals face the challenge of an increase in old-age patients, which particularly affects internal medicine wards [1]. The average age of patients in internal medicine wards is above 70 years and may even come close to 80 years [2,3], leading to an increasing prevalence of cognitive impairments [4]. Although data on the occurrence of dementia or cognitive impairments of patients in hospitals is inconsistent, the larger proportion of studies report prevalence rates of about 40% [5–7].

Many hospitals are insufficiently prepared for patients with cognitive impairments, especially in acute care units predominantly focussing on somatic diseases [8]. Patients with cognitive impairments or dementia do not fit into the typical routines and standardised workflows of hospitals as these patients need more resources for care and treatment [9,10]. These patients often become disoriented, anxious, agitated and challenge hospital staff with erratic behaviour when placed in regular care wards. This results in an increased likelihood of falls, complications during the hospital stay and post-operative complications [11,12]. Hence, patients with dementia are a vulnerable group with a higher risk for long-lasting functional impairments [13,14].

To control the challenging behaviour of patients with dementia, a common practice – at least in German acute hospitals, and especially for older patients – is to use physical restraints like side rails to keep patients in bed, or chemical restraints such as the on-demand-use of psychotropic medication or hypnotics and sedatives [15,16]. This practise is not limited to German hospitals; however, there seems to be large variations between countries [17]. Physical and chemical restraints as well as anxiety and challenging behaviour are associated with poorer outcomes in quality of life [QoL] and quality of care of patients with dementia [18,19]. Therefore, hospitals in general, and specifically internal medicine wards with their increasing proportion of patients with

1  
2  
3 dementia, need to address these issues in order to improve the quality of care for these  
4  
5 patients.  
6

7  
8 At least in Germany, there were lately no care concepts that fully address the needs of  
9  
10 patients with dementia in internal medicine [20]. The special care ward “DAVID” in the  
11  
12 Protestant Hospital Alsterdorf in Hamburg was one of the first internal medicine wards  
13  
14 in Germany that implemented a comprehensive care concept for patients with dementia,  
15  
16 aiming to improve the patients’ QoL during their hospital stay. QoL is an important  
17  
18 indicator of quality of care and a major dimension when assessing patient reported  
19  
20 outcomes, particularly in older people as global outcome measure for interventions  
21  
22 [21,22]. The assumption of this care concept is that a special care ward for patients with  
23  
24 dementia leads to better outcomes in QoL compared to regular internal medicine wards.  
25  
26 A study (“DAVID 2”) was conducted to investigate the impact of such a care concept. This  
27  
28 paper shows the results of this study and addresses two research questions. First, which  
29  
30 factors predict the QoL of patients with dementia in acute hospitals? Second, beyond  
31  
32 these factors, can a special care concept for patients with dementia in acute hospitals  
33  
34 increase the patients’ QoL?  
35  
36  
37  
38  
39  
40  
41  
42

## 43 **Methods**

### 44 **Study Design and Setting**

45  
46 The aim of this study was to compare the quality of care for patients with dementia  
47  
48 within a specialised dementia care concept as opposed to regular care in acute hospitals.  
49  
50 The present study was designed as a non-randomised case-control-study, including two  
51  
52 internal medicine wards in two hospitals located in Hamburg, Germany. The  
53  
54 intervention group was a hospital that implemented a special care ward for internal  
55  
56 medicine focussing on patients with dementia. The control group was from a hospital  
57  
58  
59  
60

1  
2  
3 with a regular care ward for internal medicine, which had no special dementia care  
4  
5 concept.  
6  
7  
8  
9

### 10 **Intervention Group**

11  
12 The special care ward “DAVID” is an internal medicine ward in the Protestant Hospital  
13 Alsterdorf, a not-for-profit organization, and has 14 beds. In the year of data collection  
14 (2016), 349 patients were treated. The ward employed nine care workers as nursing  
15  
16 staff.  
17  
18  
19

20  
21 Key components of the special care concept are a) a specific architectural design,  
22 including a homelike lounge, a specific colouring of doors and walls, and a light concept  
23 with minimum 500 lux at eye level; b) doctors, nurses and service staff are trained in  
24 coping with challenging behaviour and other dementia related issues, like basal  
25 stimulation or validation therapy, but also included case conferences to discuss issues  
26 with current patients [23]; duration of training courses and case conferences was about  
27 one hour and were provided on a monthly basis by external instructors; additionally,  
28 twice per year, an internal training course was offered for employees, lasting for half a  
29 day; c) mobile devices for diagnostics, to perform as many treatments as possible in the  
30 different rooms of the special care ward; d) involvement of relatives into assessment,  
31 care and discharge planning; and e) regular therapeutic offers like occupational or  
32 speech therapy, and social offers like music, playing or spending more time than usual to  
33 care for the patients.  
34  
35  
36  
37  
38  
39  
40  
41  
42  
43  
44  
45  
46  
47  
48  
49  
50

51  
52 To fulfil these high standards of quality of care, the ward “DAVID” employs more care  
53 staff in relation to the number of patients as compared to other regular internal  
54 medicine wards in Germany. With respect to the total number of full-time equivalents  
55 [FTE] nurses, the staff-patient-ratio is one FTE nurse per 39 patients.  
56  
57  
58  
59  
60

1  
2  
3 The Protestant Hospital Alsterdorf has a second ward for internal medicine, however,  
4 patients with dementia were usually immediately transferred to the special care ward  
5 after admission to hospital. Thus, as almost no patients with dementia were treated in  
6 the second internal medicine ward, the control group was taken from another hospital.  
7  
8  
9  
10  
11  
12  
13  
14

### 15 **Control Group**

16  
17 The regular care ward is part of a larger private-company hospital with emergency  
18 hospitalisation. It has 80 beds and in the year of data collection, about 3.500 patients  
19 were treated in this internal medicine ward. Twenty-six employees worked as care staff  
20 in this ward. Trainees sometimes supported the care team. The staff-patient-ratio in the  
21 regular care ward is approximately one FTE nurse per 130 patients. However, since the  
22 internal medicine ward in this hospital also treats patients from the emergency  
23 ambulance, the staff-patient-ratio related to the number of patients who actually stayed  
24 longer in hospital (three days and more) is lower. Unfortunately, the hospital  
25 management was not willing to provide more detailed information beside the publicly  
26 available quality reports, so we cannot quantify the staff-patient-ratio exactly.  
27  
28  
29  
30  
31  
32  
33  
34  
35  
36  
37  
38  
39

40 The regular care ward had no specific care concept for dementia patients. The care staff  
41 was not particularly trained in dementia topics.  
42  
43  
44  
45  
46  
47

### 48 **Data collection and participants**

49 An assessment questionnaire was developed to obtain data from patients with dementia.  
50 Study nurses were trained in using this assessment questionnaire and then conducted  
51 the data collection in both hospitals. Two study nurses were responsible for the special  
52 care ward and one for the regular care ward. A pre-test of two months was conducted to  
53 test and revise the questionnaire. As a result, some items were removed and instructions  
54  
55  
56  
57  
58  
59  
60

1  
2  
3 for study nurses were defined more precisely. After the pre-test, data was collected over  
4  
5 a period of about 12 months (from July 2015 to June 2016 in the special care ward and  
6  
7 from August 2015 to September 2016 in the regular care ward). To detect small to  
8  
9 medium effect sizes (Cohen's  $d \sim 0.1$  to  $0.2$ ), a power analysis was performed prior to  
10  
11 the data collection and yielded a sample size of at least 173 subjects per group. Patients  
12  
13 were included when they showed at least mild cognitive impairments or memory  
14  
15 problems. In the special care ward (intervention group) all patients were assessed  
16  
17 because a diagnosed dementia was a requirement for admission to that hospital. Hence,  
18  
19 the participation rate for the special care ward was about 94% and excluded only a few  
20  
21 patients that were not responsive. For the regular care ward (control group), patients  
22  
23 who already had a diagnosed dementia or cognitive impairments were included in the  
24  
25 study. A short dementia screening was carried out by the study nurse to assess the  
26  
27 severity of dementia of patients who had no clarified dementia diagnosis, and to identify  
28  
29 further patients who qualify for the study [24]. The total sample size for the present  
30  
31 analysis consists of  $N=526$  patients (special care ward:  $n=333$ ; regular care ward:  
32  
33  $n=193$ ). For both the intervention and control group, patients were excluded from the  
34  
35 study when they were completely confined to bed due to severe health-related  
36  
37 dependency. As both care wards had no particular selection criteria for patients such as  
38  
39 age, mobility, or the main diagnosis that lead to hospital admission, no further exclusion  
40  
41 criteria for the study were defined.

42  
43 Prior to the study, a study protocol was developed and submitted to the ethical  
44  
45 committee of the medical association of Hamburg. The ethical committee approved the  
46  
47 proposal and attested that the study conforms to ethical and legal requirements  
48  
49 (approval code PV5102). Study participants were not able to give their informed  
50  
51 consent due to their cognitive impairments. However, as data mostly derived from the  
52  
53  
54  
55  
56  
57  
58  
59  
60

1  
2  
3 hospitals' regular documentation and was completely anonymous, the ethics committee  
4  
5 waived the need of an informed consent.  
6  
7  
8  
9

## 10 **Patient and Public involvement**

11  
12 Patients and the public were not involved in the development of the research question  
13  
14 nor study design.  
15  
16

## 17 **Measures**

18  
19 *Outcome:* QoL in patients with dementia was assessed using the QUALIDEM [25,26].  
20  
21 After observing patients for about one week (depending on the length of stay), the study  
22  
23 nurses rated their QoL. QUALIDEM comprises 37 items reflecting nine different  
24  
25 subdomains of QoL: "care relationship" (7 items, 0-21 points), "positive affect" (6 items,  
26  
27 0-18 points), "negative affect" (3 items, 0-9 points), "restless and tense behaviour" (3  
28  
29 items, 0-9 points), "positive self-image" (3 items, 0-9 points), "social relations" (6 items,  
30  
31 0-18 points), "social isolation" (3 items, 0-9 points), "feeling at home" (4 items, 0-12  
32  
33 points) and "have something to do" (2 items, 0-6 points). For patients with very severe  
34  
35 dementia (Minimental State Examination Test [27] [MMSE] < 7), only six of the nine  
36  
37 subscales apply, where the dimensions "positive self-image", "feeling at home" and "have  
38  
39 something to do" were omitted. The recommendation is to report descriptive results of  
40  
41 the QUALIDEM separately for each subscale. For regression analyses, a QoL index was  
42  
43 calculated by summing up and normalizing the QUALIDEM subscales (six subscales for  
44  
45 patients with very severe dementia, nine subscales for the remaining patients) to a  
46  
47 range from 0 to 100 points. A higher score indicates better QoL. Due to normalization of  
48  
49 the QUALIDEM total score for all severities of dementia, all patients' scores are  
50  
51 consistent and comparable [28].  
52  
53  
54  
55  
56  
57  
58  
59  
60

1  
2  
3 *Independent Variables:* Age, gender, main diagnosis for admission to hospital and length  
4 of stay were recorded. Details about the distribution of the main diagnoses among  
5 patients and by hospitals are shown in the Supplementary File 1. If a main diagnosis was  
6 mentioned no more than one time in both hospital wards, it was recoded into the  
7 category “other”. The final variable “main diagnosis” comprised 20 different diagnoses. A  
8 modified version of the Charlson’s Comorbidity Index [CCI], which included depression  
9 and hypertension as new items, was built based upon the assessment of comorbidities  
10 and chronic diseases [29,30]. If patients had no chronic illnesses, the CCI had a score of  
11 zero points. Else, higher scores indicated more serious comorbid disease. Shortly after  
12 admission to hospital, the study nurses measured functional limitations and cognitive  
13 status of patients. Functional limitations in daily living were assessed with the Barthel-  
14 Index [31]. This score ranges from 0 (completely dependent) to 100 points (no basic  
15 functional limitations) and was recoded according to the classification of the ICD-10 [32]  
16 (German adaption) into a score from 1 to 6 points. The Minimental State Examination  
17 Test [27] [MMSE] measures the cognitive impairments of patients, ranging from 0 (very  
18 strong cognitive impairments) to 30 (very mild or no cognitive impairments) points.  
19 This score was recoded into three categories, also based on ICD-10 classification: severe  
20 dementia (0-16), moderate dementia (17-23 points) and mild dementia (24-27 points).  
21 After about one week of hospital stay, the study nurses rated the patients’ agitation and  
22 challenging behaviour and recorded psychotropic drug use (chemical restraint) and  
23 physical restraints. Agitation and challenging behaviour of patients was assessed using  
24 the Pittsburgh Agitation Scale [PAS] [33] ranging from 0 to 16 points (higher scores  
25 indicate stronger agitation).  
26 Physical restraints were defined as the use of one the following measures: Side rails to  
27 keep a patient in bed, tying a patient to a bed, and use of “therapeutic” chairs that

1  
2  
3 prevent patients to stand up. The variable was dichotomised, indicating whether  
4  
5 patients (in the course of the hospital stay) were mechanically restrained by at least one  
6  
7 of these measures or not.  
8  
9

10 Psychotropic drug use was defined as on-demand-use (“as-needed”) of medication for  
11  
12 the nervous system by means of the Anatomical Therapeutical Chemical (ATC)  
13  
14 classification [34] and comprises antipsychotics, anxiolytics, hypnotics/sedatives and  
15  
16 antidepressants (N05A-C, N06A). Indicated use of psychotropic drugs was defined as  
17  
18 medications that were prescribed for regular, not on-demand-use and not only given to  
19  
20 patients in order to control their challenging behaviour. Such use of psychotropic drugs  
21  
22 was excluded from the analysis. The on-demand-use variable was dichotomised and  
23  
24 shows whether, during the complete hospital stay, chemical restraints were applied to  
25  
26 patients or not.  
27  
28  
29

30  
31 While these variables already cover many different aspects that have an effect on the  
32  
33 QoL, we decided to add a further predictor as proxy for the intervention to the model.  
34  
35 Therefore, we included a binary variable with two categories (“control” as reference and  
36  
37 “intervention”) representing the two hospitals, to estimate the impact of the special care  
38  
39 concept. This should reflect how much of the change in QoL is attributable to the special  
40  
41 care concept.  
42  
43  
44  
45  
46  
47

### 48 **Missing Data**

49  
50 In total, 11% of individual items across all scales were missing (at random), 6% of  
51  
52 individual items when looking at the QUALIDEM only. The missing data pattern was  
53  
54 analysed and missing data was imputed using the multivariate imputation by chained  
55  
56 equations method [35], using 11 imputation steps corresponding to the proportion of  
57  
58 missing data [36]. The method for imputing missing values depends on the variable’s  
59  
60



1  
2  
3 nature. For continuous variables, predictive mean matching was applied, while logistic  
4  
5 regressions were used for binary variables.  
6  
7  
8  
9

## 10 **Statistical Methods**

11  
12 Descriptive results for the total sample and each hospital are reported. Statistically  
13  
14 significant differences of  $p < 0.05$  between the two hospital wards were tested using t-  
15  
16 tests,  $\chi^2$ -tests or Mann-Whitney-U-tests, depending on the level of measurement and  
17  
18 distribution of variables. Differences between the hospitals in the QUALIDEM subscales  
19  
20 are presented as boxplots, showing the median value and upper and lower quartiles of  
21  
22 the value distribution.  
23  
24

25  
26 As multivariate analysis, a Bayesian linear mixed model was applied to analyse the  
27  
28 associations between the independent variables and the outcome. Computations were  
29  
30 based on Stan [37], a probabilistic programming language for specifying Bayesian  
31  
32 models, using Markov Chain Monte Carlo sampling (in particular, Hamiltonian Monte  
33  
34 Carlo) [38]. We assume that the patients' main diagnosis is associated with different  
35  
36 degrees of physical impairments, which affect the QoL. Therefore, the variable 'main  
37  
38 diagnosis' was used as level-2 unit (*random intercept*) in the multilevel model to control  
39  
40 for the variation in the outcome. We used informative priors for the predictors age,  
41  
42 female gender, severe dementia, psychotic drug use and physical restraints, based on  
43  
44 information from former research [18,39,40]. Weakly informative priors were used for  
45  
46 the remaining predictors. The prior and posterior distributions of the model are  
47  
48 summarised in the supplemental material (see Supplementary File 2).  
49  
50  
51  
52

53  
54 Continuous predictors were centred before entering the model. Age was divided by 10,  
55  
56 so a 1-unit change in the predictor of age reflects a change of 10 years in patients. The  
57  
58 median value of the posterior distribution is used as "Bayesian point estimate", which  
59  
60

1  
2  
3 minimises the difference of estimates from true values over posterior samples, but there  
4 are many other plausible values (the “posterior distribution”) to describe the association  
5  
6 between predictors and outcome. Hence, 50% and 89% highest density intervals [41]  
7  
8 [HDI] are shown to indicate the range of most credible values and to reflect the (un-  
9  
10 )certainty of the estimates. The intraclass correlation coefficient [42] was calculated to  
11  
12 see how much of the proportion of the variance in the outcome can be explained by the  
13  
14 grouping structure (‘main diagnosis’). We developed post-hoc additional regression  
15  
16 models with interaction terms for need predictors (Barthel-Index, physical and chemical  
17  
18 restraints, PAS-Score) to check if the associations between the complexity of patients’  
19  
20 needs and QoL differ between hospitals. We found no significant interaction terms and  
21  
22 decided to present the most parsimonious model here and show further results in the  
23  
24 appendix (see Supplementary File 3).

25  
26 All analyses were conducted with the R statistical package [43], including the packages  
27  
28 *mice* [35], *ggplot* [44], *brms* [45] and *sjPlot* [46]. The source code is available in the  
29  
30 supplemental material (see Supplementary File 4). Data is available online [47].  
31  
32  
33  
34  
35  
36  
37  
38  
39  
40

## 41 **Results**

### 42 **Sample Characteristics**

43  
44 Table 1 gives an overview of the sample characteristics. The proportion of female to  
45  
46 male patients is similar in both groups. The mean age is 4 years higher in the control  
47  
48 group. There are also significant group differences in the Barthel-Index indicating higher  
49  
50 functional impairment in the control group, while the dementia severity was the same in  
51  
52 both hospitals. Comorbid conditions are slightly higher in the control group. Patients  
53  
54 stayed 9.4 days in hospital on average and nearly one day longer in the intervention  
55  
56 group as compared to the control group. Large differences between the two hospitals  
57  
58  
59  
60

can be seen in the use of medical and physical restraints with significantly less use in the intervention group. Agitation- and QoL-scores also show strong group differences to the disadvantage of the patients in the control group.

In most cases, the distribution of main diagnoses of patients were comparable between the two hospital wards (see Supplemental File 1). Most frequent were pneumonia (13.5% in the intervention group and 11.9% in the control group), a worsening medical condition of patients (8.7% and 7.2%) or exsiccosis (4.8% and 6.7%). Noticeable differences between the two wards were found in urinary tract infections (UTI) (9.9% in the intervention group and 3.1% in the control group) or dyspnoea (1.2% and 7.8%).

Table 1: Sample Characteristics

| Characteristic                            | Control Group (Regular Care Ward, n=193) | Intervention Group (Special Care Ward, n=333) | Total (N=526) | p-value of difference |
|-------------------------------------------|------------------------------------------|-----------------------------------------------|---------------|-----------------------|
| Female, %                                 | 59.1                                     | 61.6                                          | 60.6          | .637                  |
| Mean Age (SD)                             | 83.1 (7.2)                               | 79.0 (11.9)                                   | 80.5 (10.6)   | <.001                 |
| Mean Barthel-Index (SD)                   | 29.9 (27.9)                              | 40.7 (30.4)                                   | 36.7 (29.9)   | <.001                 |
| Mild Dementia, %                          | 7.8                                      | 9.6                                           | 8.9           | .580                  |
| Moderate Dementia, %                      | 30.0                                     | 26.7                                          | 27.9          | .473                  |
| Severe Dementia, %                        | 62.2                                     | 63.7                                          | 63.2          | .805                  |
| Mean Length of Stay, in Days (SD)         | 8.9 (7.5)                                | 9.7 (5.5)                                     | 9.4 (6.3)     | .002                  |
| Physical Restraints (yes), %              | 54.4                                     | 28.2                                          | 37.8          | <.001                 |
| Psychotropic Drug Use (yes, as-needed), % | 25.9                                     | 14.1                                          | 18.4          | .001                  |
| Mean-Score Pittsburg Agitation Scale (SD) | 3.9 (3.1)                                | 3.0 (3.2)                                     | 3.3 (3.2)     | <.001                 |
| Mean Charlson' Comorbidity Index (SD)     | 3.2 (3.0)                                | 2.5 (2.0)                                     | 2.8 (1.6)     | <.001                 |
| Mean Qualidem Total Score (SD)            | 40.7 (14.5)                              | 51.2 (17.2)                                   | 47.3 (17.0)   | <.001                 |

Barthel-Index: 0-100 (higher = better functioning); Dementia (MMSE score): mild: 24-27; moderate: 17-23; severe: <= 16; Pittsburg Agitation Scale: 0-16 (higher = stronger agitation and anxiety); Charlson' Comorbidity Index: 0-9 (higher = more comorbidities); QUALIDEM: 0-100 (higher = better QoL)

## Quality of life

1  
2  
3 Looking at the QoL for patients with severe to mild cognitive impairments (these are the  
4 ones, in which all subdomains of the QUALIDEM could be applied), there is a consistent  
5 pattern across all QUALIDEM-domains: Patients in the control group have a lower QoL  
6 compared to the intervention group. Except for the last subdomain ('having something  
7 to do'), all differences are statistically significant (Figure 1).  
8  
9  
10  
11  
12  
13  
14  
15  
16

17 The same consistent pattern can be found for patients with very severe dementia  
18 symptoms (MMSE score < 7). Here, only the second of the six applied subdomains  
19 ('positive affect') does not differ significantly between intervention and control (Figure  
20 2).  
21  
22  
23  
24  
25  
26  
27  
28

### 29 **Predictors of quality of life**

30  
31 Figure 3 shows the results from the Bayesian mixed model. Three predictors are clearly  
32 negatively associated with QoL: physical restraint, psychotropic drug use and agitation  
33 (PAS-score). Physical restraint is associated with a 4.9-point decrease in QoL. With 50%  
34 probability, the QoL decreases by 4.1 to 5.8 points and with a chance of 89% by -7 to -2.8  
35 points respectively. The application of psychotropic drugs as-needed shows similar  
36 results, with a posterior median of -4.4. The third clearly negative associated predictor is  
37 agitation, which shows a decrease in QoL of about 2.9 points for each additional point in  
38 the PAS-score.  
39  
40  
41  
42  
43  
44  
45  
46  
47  
48

49 Dementia and gender are not clearly associated with QoL. Neither are the length of  
50 hospital stay and the CCI.  
51  
52  
53

54 The age of the patient correlates slightly positive with QoL, where an increase of 10  
55 years means an increase of about 1.2 points in the QoL. The posterior median of the  
56 Barthel-Index is 2.0, so for a one-category change in functional impairments the QoL  
57  
58  
59  
60

1  
2  
3 changes by two points. This means that patients with severe functional impairments  
4  
5 differ by about 10 points in QoL compared to patients with no functional impairments.  
6  
7 Controlling for all other predictors, the intervention (special care ward) shows the  
8  
9 strongest association with our outcome of interest, the patients' QoL. The posterior  
10  
11 median is 5.7, and with an 89% probability, the credible values describing the effect of  
12  
13 the intervention on QoL are within the range from 3.8 to 7.6.  
14  
15

16  
17 The intraclass correlation coefficient of the model is rather low (0.01). This means, the  
18  
19 'main diagnosis' does not explain much of the variance in the patients' QoL and there is  
20  
21 almost no regularization ("shrinkage") of estimated model parameters and no larger  
22  
23 differences between hospitals according to the patients' needs, as indicated by their  
24  
25 main diagnosis.  
26  
27  
28  
29  
30

## 31 **Discussion**

32  
33 The study reported in this paper sought to understand those factors that influence the  
34  
35 QoL in patients with dementia and whether a special care concept for these patients  
36  
37 performs better in this regard as opposed to regular care wards.  
38  
39

40  
41 One of our main findings is that QoL differs significantly between the control and  
42  
43 intervention group. We found substantial differences between the two hospitals in the  
44  
45 patients' total QoL score in favour of the special care ward. Beyond the statistical  
46  
47 significance, this finding also has a clinical impact. Studies suggest a change in 3 points  
48  
49 for the Quality of Life – Alzheimer's Disease Scale [48], which has a range of 40 points, to  
50  
51 be clinically relevant [49,50]. Transferred to the range of the QUALIDEM scale, a  
52  
53 difference of about 7.5 points would be considered as an important improvement in  
54  
55 QoL. Another indicator to evaluate the clinical relevance of a change in QoL is an  
56  
57 increase of the score of half a standard deviation [51], which would be about 8.5 points  
58  
59  
60

1  
2  
3 for our data. Taking these reference points as a basis, we found evidence for the clinical  
4 relevant improvement in QoL of patients in a special care ward.  
5  
6

7  
8 A second key finding is the identification of those factors that are clearly associated with  
9  
10 QoL. The use of physical and chemical restraints, both happening more frequently in the  
11 control group, are associated with lower outcomes in QoL. This finding is in line with  
12  
13 other studies that suggest a negative association between physical and chemical  
14  
15 restraints and QoL [18,40] and explains why the regular care ward performs less good in  
16  
17 this regard than the special care ward. Agitation was also negatively associated with  
18  
19 QoL. This is understandable as agitation is an expression of anxiety and indisposition of  
20  
21 people with dementia and typically occurs after admission to hospital. Furthermore,  
22  
23 agitation is often a reason for psychotropic drug use or physical restraint and, thus, also  
24  
25 negatively affects QoL [52,53]. Independent from these factors, the special care ward  
26  
27 itself shows the strongest impact on QoL, indicating that patients with dementia  
28  
29 explicitly benefit from specialised care concepts. Other studies also report these  
30  
31 benefits, both in a nursing home or hospital setting [54,55]. Since we controlled for  
32  
33 patient characteristics like main diagnosis, age, functional limitations, chronic  
34  
35 comorbidities, agitation, length of stay etc. in our model, we do not assume that the  
36  
37 positive effect of the special care ward is completely a result of a biased sample between  
38  
39 intervention and control group. Although the two compared hospitals differ in their  
40  
41 structures and size, patients' characteristics are largely comparable between the  
42  
43 samples in the control and intervention group. For instance, there is no substantial  
44  
45 difference between the two hospitals regarding the relationship between functional  
46  
47 impairments and physical restraints. Moreover, to see if the complexity of patients' need  
48  
49 affects our findings, we calculated regression models with interaction terms between  
50  
51 need factors moderated by hospitals (see Supplementary File 3). The association  
52  
53  
54  
55  
56  
57  
58  
59  
60

1  
2  
3 between complexity of needs and QoL is not significantly different between the  
4  
5 intervention and control group. Based on our results we suggest that the special care  
6  
7 concept mainly explains the differences in the QoL. Although it is certainly difficult to  
8  
9 determine the exact effect of the special care concept on the patients' QoL, our findings  
10  
11 seem plausible in the light of the key elements of this intervention. A higher ratio of care  
12  
13 staff as to patients, smaller facilities or systematically trained employees can be  
14  
15 considered essential for health care provision to patients with dementia and are much  
16  
17 better conditions for less physical or chemical restraints, independent of the functional  
18  
19 limitations of patients. The special care ward provides a more dementia-friendly interior  
20  
21 design, including orientation and navigation aids and the use of light and colours, which  
22  
23 are considered as important components to reduce agitation for patients with dementia  
24  
25 [56]. These findings and conclusions are in line with other studies on hospital care that  
26  
27 suggest that an increased staff ratio or the implementation of multiple components,  
28  
29 which particularly address the needs of patients with dementia, lead to reduced use of  
30  
31 physical restraints and psychotropic drug use and improve the quality of care [57,58].  
32  
33 Furthermore, dementia-specific educational programmes, as implemented in the special  
34  
35 care ward, have positive effects on nurses regarding their interaction with patients with  
36  
37 dementia. Trained nurses can improve their coping skills in handling challenging  
38  
39 behaviour of these patients, and better attend to the patients' unmet physical and  
40  
41 psychological needs [59]. Studies suggest that the use of both physical and chemical  
42  
43 restraints is reduced for nurses who completed a dementia-specific training as opposed  
44  
45 to nurses who did not complete such an educational programme. Trained nurses had  
46  
47 better skills in providing patient-centred care and thus improving the QoL for patients  
48  
49 with dementia [59–61]. The special care ward benefits from a higher staff ratio, i.e.  
50  
51 nurses have to care for fewer patients with dementia compared to the control group.  
52  
53  
54  
55  
56  
57  
58  
59  
60

1  
2  
3 While this is an intentional element of the concept, the downside is higher personnel  
4 costs. Only few studies investigated the follow-up costs for patients with dementia in  
5 home care settings after hospitalization. Costa et al. predicted additional monthly costs  
6 in home care of about 445 Euros due to increased agitation of patients with dementia  
7 [62]. Thus, if patients with dementia benefit from special care concepts and perceive  
8 better outcomes in quality of life and care, the increased costs for more care personnel  
9 may be compensated by reducing follow-up costs for the ambulatory care. However,  
10 further research is needed to give more exact projections of the increased costs and  
11 potential of saving money.  
12  
13  
14  
15  
16  
17  
18  
19  
20  
21  
22  
23

24 Another finding is that the severity of cognitive impairments, measured with the MMSE,  
25 is a rather improper indicator to represent the underlying problems of and with the  
26 dementia disease, as these factors were not consistently associated with QoL. Direct  
27 measures of the problems associated with dementia, as agitation or challenging  
28 behaviour, should be considered as well when it comes to investigate the QoL of patients  
29 with dementia.  
30  
31  
32  
33  
34  
35  
36  
37

38 Our study has several limitations. One concerns the structural differences between the  
39 two hospitals. The hospital with the special care ward is much smaller than the hospital  
40 that hosted the control group. A second control group or an intervention group in a  
41 hospital of a similar size as the hospital with the regular care ward may have permitted  
42 a more distinct comparison. We tried to keep the impact of the structural differences as  
43 minimal as possible, for instance by accounting for many different patient  
44 characteristics including functional status, comorbidities and behavioural problems.  
45 Furthermore, the main diagnoses of patients were also considered in the analysis. We  
46 assume that we could at least partly adjust our analysis for a bias due to patient  
47 selection mechanisms. To validate our assumptions, we investigated to which extent the  
48  
49  
50  
51  
52  
53  
54  
55  
56  
57  
58  
59  
60



1  
2  
3 association between patient characteristics and QoL is affected by differences between  
4 the control and intervention group (details shown in Supplementary File 3). Results  
5 suggest that our data provides no strong evidence for noticeably differences between  
6 the intervention and control group regarding the association between complexity of  
7 patients' needs and QoL. However, although we adjusted our analysis for many patient  
8 characteristics, we cannot eliminate a potential bias due to different hospital structures.  
9  
10 In particular, the higher mean age and stronger functional limitations in the control  
11 group may indicate a selection bias in our sample. We suggest that further studies  
12 should take a second control group or a more comparable intervention group into  
13 account to gain more insight into potential biases due to structural differences of the  
14 control and intervention group. Another structural difference between the intervention  
15 and control group that certainly affects the results are the different staff-patient-ratios.  
16  
17 In the special care ward, nurses have to care for fewer patients than in the regular care  
18 ward. Although we assume that this aspect probably has the highest impact on the  
19 outcomes in QoL, this is not a "selection bias" per se rather than a core component of the  
20 intervention. A higher staff-patient-ratio, dementia-specific training programmes, or a  
21 specific architectural design are key elements of the special care concept, which, in  
22 their entirety, are reflected in the resulting differences between hospitals. A further  
23 limitation is possibly the first and thus rather exploratory use of the QUALIDEM  
24 assessment in a hospital setting. Although studies show reliable results of the  
25 QUALIDEM in nursing homes even for a short observation period of about one week  
26 [63], there are no studies that evaluate the reliability and validity for use in hospitals.  
27  
28 We have done checks of internal consistencies, which showed that most subdomains of  
29 the QUALIDEM perform well with our data and are comparable to results from other  
30 validation studies [64]. This indicates that the use of the QUALIDEM is feasible for  
31  
32  
33  
34  
35  
36  
37  
38  
39  
40  
41  
42  
43  
44  
45  
46  
47  
48  
49  
50  
51  
52  
53  
54  
55  
56  
57  
58  
59  
60

1  
2  
3 hospital research. However, due to financial and logistic limitations, it was not possible  
4  
5 to monitor the complete data collection and accurate completion of questionnaires.  
6  
7 Hence, we cannot give evidence on the interrater reliability apart from the intense  
8  
9 training of the study nurses. Finally, due to the nature of the study design, it was not  
10  
11 possible that study nurses in the intervention and control group were blinded. This  
12  
13 might affect the results insofar as study nurses may have generated more generous  
14  
15 responses for the assessment scales [65].  
16  
17  
18  
19  
20  
21

## 22 **Conclusions**

23  
24 On the whole, we think that a special care ward will improve the quality of care and is  
25  
26 effective regarding the positive impact on the QoL of patients with dementia. Our study  
27  
28 showed that after controlling for different predictors, the intervention still has a  
29  
30 perceptible effect concerning clinical important differences in our outcome of interest,  
31  
32 the patients' quality of life. However, such improvements can only be achieved by  
33  
34 implementing a concept with multiple components that address the explicit needs of  
35  
36 patients with dementia. The implementation of a special care concept usually increases  
37  
38 the costs for hospitals because it requires a higher staff-patient-ratio, regular training of  
39  
40 employees or more therapeutic offers. On the other hand, costs that accumulate in  
41  
42 informal care after hospital stay as a result of poorer quality of care in hospitals can be  
43  
44 much higher than additional personnel costs and could probably be reduced [62,66].  
45  
46  
47  
48  
49

50 Health policies should consider the benefits of special care concepts and develop  
51  
52 incentives for hospitals to improve the QoL and quality of care for patients with  
53  
54 dementia.  
55  
56  
57  
58  
59  
60

1  
2  
3  
4  
5  
6  
7  
8  
9  
10  
11  
12  
13  
14  
15  
16  
17  
18  
19  
20  
21  
22  
23  
24  
25  
26  
27  
28  
29  
30  
31  
32  
33  
34  
35  
36  
37  
38  
39  
40  
41  
42  
43  
44  
45  
46  
47  
48  
49  
50  
51  
52  
53  
54  
55  
56  
57  
58  
59  
60

For peer review only

## Acknowledgement

The authors are grateful to the clinical staff of both hospitals who supported this study by helping with the data collection. Furthermore, we are thankful to the Authority of Health and Consumer Protection and the Homann-foundation for funding this study.

## Author Contributions

DL was involved in conception and design of the study, analysis and interpretation of data and drafting the article. GP was involved in conception and design of the study and interpretation of data. JK was involved in interpretation of data and drafting the article. CK was involved in conception and design of the study, interpretation of data and drafting the article.

## Competing interests

The authors have declared that no competing interests exist.

## Funding

The present study was funded by the Behörde für Gesundheit und Verbraucherschutz (Authority of Health and Consumer Protection) in Hamburg and the Homann-foundation (grant number Z/65454/2014/F500-02.10/10,002). No one of the funders was involved in the data analysis process and did not influence or hold back results of the study.

## Ethics approval and consent to participate

Prior to the study, a study protocol was developed and submitted to the ethical committee of the medical association of Hamburg ("Ethik-Kommission der Ärztekammer Hamburg"). The IRB of the ethical committee approved the proposal and attested that the study conforms to ethical and legal requirements (approval code PV5102). Study participants were not able to give their informed consent due to their cognitive impairments. However, as data mostly derived from the hospitals' regular documentation and was completely anonymous, the IRB of the ethics committee waived the need of an informed consent.

### Availability of data and material

All data generated or analysed during this study are licensed under CC BY-NC 4.0 and available in the Zenodo repository (DOI: 10.5281/zenodo.1479677) at <https://doi.org/10.5281/zenodo.1479676>.

For peer review only

## References

- 1 Recine U, Scotti E, Bruzzese V, *et al.* The change of hospital internal medicine: a study on patients admitted in internal medicine wards of 8 hospitals of the Lazio area, Italy. *Ital J Med* 2015;**9**:252. doi:10.4081/itjm.2015.523
- 2 Raveh D, Gratch L, Yinnon AM, *et al.* Demographic and clinical characteristics of patients admitted to medical departments. *J Eval Clin Pract* 2005;**11**:33–44. doi:10.1111/j.1365-2753.2004.00492.x
- 3 Sonnenblick M, Raveh D, Gratch L, *et al.* Clinical and demographic characteristics of elderly patients hospitalised in an internal medicine department in Israel: Characteristics of elderly patients in medical wards. *Int J Clin Pract* 2007;**61**:247–54. doi:10.1111/j.1742-1241.2006.00925.x
- 4 Mukadam N, Sampson EL. A systematic review of the prevalence, associations and outcomes of dementia in older general hospital inpatients. *Int Psychogeriatr* 2011;**23**:344–55. doi:10.1017/S1041610210001717
- 5 Zekry D, Herrmann FR, Grandjean R, *et al.* Does dementia predict adverse hospitalization outcomes? A prospective study in aged inpatients. *Int J Geriatr Psychiatry* 2009;**24**:283–91. doi:10.1002/gps.2104
- 6 Lyketsos CG, Sheppard JM, Rabins PV. Dementia in elderly persons in a general hospital. *Am J Psychiatry* 2000;**157**:704–7. doi:10.1176/appi.ajp.157.5.704
- 7 Sampson EL, Blanchard MR, Jones L, *et al.* Dementia in the acute hospital: prospective cohort study of prevalence and mortality. *Br J Psychiatry J Ment Sci* 2009;**195**:61–6. doi:10.1192/bjp.bp.108.055335
- 8 Pinkert C, Holle B. Menschen mit Demenz im Akutkrankenhaus: Literaturübersicht zu Prävalenz und Einweisungsgründen. *Z Für Gerontol Geriatr* 2012;**45**:728–34. doi:10.1007/s00391-012-0319-1
- 9 Dutzi I, Schwenk M, Micol W, *et al.* Patienten mit Begleitdiagnose Demenz. *Z Für Gerontol Geriatr* 2013;**46**:208–13. doi:10.1007/s00391-013-0483-y
- 10 Timmons S, O’Shea E, O’Neill D, *et al.* Acute hospital dementia care: results from a national audit. *BMC Geriatr* 2016;**16**:113. doi:10.1186/s12877-016-0293-3
- 11 Pi H-Y, Gao Y, Wang J, *et al.* Risk Factors for In-Hospital Complications of Fall-Related Fractures among Older Chinese: A Retrospective Study. *BioMed Res Int* 2016;**2016**:1–11. doi:10.1155/2016/8612143
- 12 Hu C-J, Liao C-C, Chang C-C, *et al.* Postoperative Adverse Outcomes in Surgical Patients with Dementia: A Retrospective Cohort Study. *World J Surg* 2012;**36**:2051–8. doi:10.1007/s00268-012-1609-x
- 13 Motzek T, Junge M, Marquardt G. Einfluss der Demenz auf Verweildauer und Erlöse im Akutkrankenhaus. *Z Für Gerontol Geriatr* 2017;**50**:59–66. doi:10.1007/s00391-016-1040-2

- 14 Gross AL, Jones RN, Habtemariam DA, *et al.* Delirium and Long-term Cognitive Trajectory Among Persons With Dementia. *Arch Intern Med* 2012;**172**:1324. doi:10.1001/archinternmed.2012.3203
- 15 Nakanishi M, Okumura Y, Ogawa A. Physical restraint to patients with dementia in acute physical care settings: effect of the financial incentive to acute care hospitals. *Int Psychogeriatr* 2017;:1–10. doi:10.1017/S104161021700240X
- 16 Krüger C, Mayer H, Haastert B, *et al.* Use of physical restraints in acute hospitals in Germany: a multi-centre cross-sectional study. *Int J Nurs Stud* 2013;**50**:1599–606. doi:10.1016/j.ijnurstu.2013.05.005
- 17 Heinze C, Dassen T, Grittner U. Use of physical restraints in nursing homes and hospitals and related factors: a cross-sectional study: Physical restraints in nursing homes and hospitals. *J Clin Nurs* 2012;**21**:1033–40. doi:10.1111/j.1365-2702.2011.03931.x
- 18 Beerens HC, Sutcliffe C, Renom-Guiteras A, *et al.* Quality of Life and Quality of Care for People With Dementia Receiving Long Term Institutional Care or Professional Home Care: The European RightTimePlaceCare Study. *J Am Med Dir Assoc* 2014;**15**:54–61. doi:10.1016/j.jamda.2013.09.010
- 19 Beerens HC, Zwakhalen SMG, Verbeek H, *et al.* Factors associated with quality of life of people with dementia in long-term care facilities: A systematic review. *Int J Nurs Stud* 2013;**50**:1259–70. doi:10.1016/j.ijnurstu.2013.02.005
- 20 Kricheldorf C, Hofmann W. Demenz im Akutkrankenhaus. *Z Für Gerontol Geriatr* 2013;**46**:196–7. doi:10.1007/s00391-013-0484-x
- 21 Treurniet HF, Essink-Bot M-L, Mackenbach JP, *et al.* Health-related quality of life: an indicator of quality of care? *Qual Life Res* 1997;**6**:363–9. doi:10.1023/A:1018435427116
- 22 Valderas JM, Alonso J. Patient reported outcome measures: a model-based classification system for research and clinical practice. *Qual Life Res* 2008;**17**:1125–35. doi:10.1007/s11136-008-9396-4
- 23 Tondi L, Ribani L, Bottazzi M, *et al.* Validation therapy (VT) in nursing home: A case-control study. *Arch Gerontol Geriatr* 2007;**44**:407–11. doi:10.1016/j.archger.2007.01.057
- 24 Kaiser AK, Hitzl W, Iglseider B. Three-question dementia screening: Development of the Salzburg Dementia Test Prediction (SDTP). *Z Für Gerontol Geriatr* 2014;**47**:577–82. doi:10.1007/s00391-013-0568-7
- 25 Ettema TP, Dröes R-M, de Lange J, *et al.* QUALIDEM: development and evaluation of a dementia specific quality of life instrument. Scalability, reliability and internal structure. *Int J Geriatr Psychiatry* 2007;**22**:549–56. doi:10.1002/gps.1713
- 26 Dichter MM, Ettema TP, Schwab CGG, *et al.* Benutzerhandbuch für die deutschsprachige QUALIDEM Version 2.0. Witten: 2016.
- 27 Folstein MF, Folstein SE, McHugh PR. “Mini-mental state”. A practical method for grading the cognitive state of patients for the clinician. *J Psychiatr Res* 1975;**12**:189–98.

- 1  
2  
3 28 Dichter MN, Meyer G. Quality of Life of People with Dementia in Nursing Homes. In:  
4 Schüssler S, Lohrmann C, eds. *Dementia in Nursing Homes*. Cham: Springer 2017. 139–  
5 57. doi:10.1007/978-3-319-49832-4\_11  
6  
7  
8 29 Charlson ME, Pompei P, Ales KL, *et al*. A new method of classifying prognostic  
9 comorbidity in longitudinal studies: development and validation. *J Chronic Dis*  
10 1987;**40**:373–83.  
11  
12 30 Charlson ME, Charlson RE, Peterson JC, *et al*. The Charlson comorbidity index is  
13 adapted to predict costs of chronic disease in primary care patients. *J Clin Epidemiol*  
14 2008;**61**:1234–40. doi:10.1016/j.jclinepi.2008.01.006  
15  
16 31 Mahoney FI, Barthel DW. Functional Evaluation: The Barthel Index. *Md State Med J*  
17 1965;**14**:61–5.  
18  
19 32 Deutsches Institut f. medizinische Dokumentation u. Information (DIMDI). *ICD-10-GM*  
20 *2017 Systematisches Verzeichnis*. Lich, Hess: pictura Werbung 2016.  
21  
22 33 Rosen J, Burgio L, Kollar M, *et al*. The Pittsburg Agitation Scale: A user-friendly  
23 instrument for rating agitation in dementia patients. *Am J Geriatr Psychiatry Off J Am*  
24 *Assoc Geriatr Psychiatry* 1994;**2**:52–9.  
25  
26 34 WHO Collaborating Centre for Drug Statistics Methodology, editor. *Guidelines for ATC*  
27 *classification and DDD assignment 2013*. Oslo: 2012.  
28  
29 35 Buuren S van, Groothuis-Oudshoorn K. mice: Multivariate Imputation by Chained  
30 Equations in R. *J Stat Softw* 2011;**45**. doi:10.18637/jss.v045.i03  
31  
32 36 White IR, Royston P, Wood AM. Multiple imputation using chained equations: Issues and  
33 guidance for practice. *Stat Med* 2011;**30**:377–99. doi:10.1002/sim.4067  
34  
35 37 Carpenter B, Gelman A, Hoffman MD, *et al*. Stan: A Probabilistic Programming  
36 Language. *J Stat Softw* 2017;**76**. doi:10.18637/jss.v076.i01  
37  
38 38 Gelman A, Carlin JB, Stern HS, *et al*. *Bayesian data analysis*. Third edition. Boca Raton:  
39 CRC Press 2014.  
40  
41 39 Barca ML, Engedal K, Laks J, *et al*. Quality of Life among Elderly Patients with  
42 Dementia in Institutions. *Dement Geriatr Cogn Disord* 2011;**31**:435–42.  
43 doi:10.1159/000328969  
44  
45 40 Beer C, Flicker L, Horner B, *et al*. Factors Associated with Self and Informant Ratings of  
46 the Quality of Life of People with Dementia Living in Care Facilities: A Cross Sectional  
47 Study. *PLoS ONE* 2010;**5**:e15621. doi:10.1371/journal.pone.0015621  
48  
49 41 McElreath R. *Statistical rethinking: a Bayesian course with examples in R and Stan*. Boca  
50 Raton London New York: CRC Press, Taylor & Francis Group 2016.  
51  
52 42 Hox JJ. *Multilevel analysis: techniques and applications*. 2nd ed. New York: Routledge  
53 2010.  
54  
55 43 R Core Team. *R: A Language and Environment for Statistical Computing*. Vienna,  
56 Austria: R Foundation for Statistical Computing 2018. <https://www.R-project.org/>  
57  
58  
59  
60



- 1  
2  
3 44 Wickham H. *ggplot2: Elegant Graphics for Data Analysis*. 2nd ed. New York: Springer  
4 2016.  
5  
6 45 Bürkner P-C. brms: An R Package for Bayesian Multilevel Models Using Stan. *J Stat*  
7 *Softw* 2017;**80**. doi:10.18637/jss.v080.i01  
8  
9 46 Lüdtke D. *sjPlot: Data Visualization for Statistics in Social Science*. 2018.  
10 doi:10.5281/zenodo.1308157  
11  
12 47 Lüdtke D. Dataset: Quality Of Life Of Patients With Dementia In Acute Hospitals-  
13 Version 1.0. 2018. doi:10.5281/zenodo.1479677  
14  
15 48 Thorgrimsen L, Selwood A, Spector A, *et al*. Whose quality of life is it anyway? The  
16 validity and reliability of the Quality of Life-Alzheimer's Disease (QoL-AD) scale.  
17 *Alzheimer Dis Assoc Disord* 2003;**17**:201–8.  
18  
19 49 Selwood A, Thorgrimsen L, Orrell M. Quality of life in dementia--a one-year follow-up  
20 study. *Int J Geriatr Psychiatry* 2005;**20**:232–7. doi:10.1002/gps.1271  
21  
22 50 Hoe J, Hancock G, Livingston G, *et al*. Changes in the quality of life of people with  
23 dementia living in care homes. *Alzheimer Dis Assoc Disord* 2009;**23**:285–90.  
24 doi:10.1097/WAD.0b013e318194fc1e  
25  
26 51 Norman GR, Sloan JA, Wyrwich KW. Interpretation of Changes in Health-related Quality  
27 of Life: The Remarkable Universality of Half a Standard Deviation. *Med Care*  
28 2003;**41**:582–92. doi:10.1097/01.MLR.0000062554.74615.4C  
29  
30 52 Lam K, Kwan JSK, Wai Kwan C, *et al*. Factors Associated With the Trend of Physical  
31 and Chemical Restraint Use Among Long-Term Care Facility Residents in Hong Kong:  
32 Data From an 11-Year Observational Study. *J Am Med Dir Assoc* 2017;**18**:1043–8.  
33 doi:10.1016/j.jamda.2017.06.018  
34  
35 53 Ó Flatharta T, Haugh J, Robinson SM, *et al*. Prevalence and predictors of bedrail use in  
36 an acute hospital. *Age Ageing* 2014;**43**:801–5. doi:10.1093/ageing/afu081  
37  
38 54 Kok JS, Berg IJ, Scherder EJA. Special Care Units and Traditional Care in Dementia:  
39 Relationship with Behavior, Cognition, Functional Status and Quality of Life - A Review.  
40 *Dement Geriatr Cogn Disord Extra* 2013;**3**:360–75. doi:10.1159/000353441  
41  
42 55 von Renteln-Kruse W, Neumann L, Klugmann B, *et al*. Geriatric Patients With Cognitive  
43 Impairment. *Dtsch Arztebl Int* 2015;**112**:103–12. doi:10.3238/arztebl.2015.0103  
44  
45 56 Büter K, Motzek T, Dietz B, *et al*. Demenzsensible Krankenhausstationen:  
46 Expertenempfehlungen zu Planung und Gestaltung. *Z Für Gerontol Geriatr* 2017;**50**:67–  
47 72. doi:10.1007/s00391-016-1079-0  
48  
49 57 Blair A, Anderson K, Bateman C. The “Golden Angels”: effects of trained volunteers on  
50 specialling and readmission rates for people with dementia and delirium in rural hospitals.  
51 *Int Psychogeriatr* 2018;:1–10. doi:10.1017/S1041610218000911  
52  
53 58 Sinvani L, Warner-Cohen J, Strunk A, *et al*. A Multicomponent Model to Improve  
54 Hospital Care of Older Adults with Cognitive Impairment: A Propensity Score-Matched  
55  
56  
57  
58  
59  
60

- 1  
2  
3 Analysis. *J Am Geriatr Soc* Published Online First: 11 August 2018.  
4 doi:10.1111/jgs.15452  
5
- 6  
7 59 Schindel Martin L, Gillies L, Coker E, *et al.* An Education Intervention to Enhance Staff  
8 Self-Efficacy to Provide Dementia Care in an Acute Care Hospital in Canada: A  
9 Nonrandomized Controlled Study. *Am J Alzheimers Dis Dementiasr* 2016;**31**:664–77.  
10 doi:10.1177/1533317516668574  
11
- 12 60 Matsuda Y, Hashimoto R, Takemoto S, *et al.* Educational benefits for nurses and nursing  
13 students of the dementia supporter training program in Japan. *PLOS ONE*  
14 2018;**13**:e0200586. doi:10.1371/journal.pone.0200586  
15
- 16 61 Galvin JE, Kuntemeier B, Al-Hammadi N, *et al.* “Dementia-friendly Hospitals: Care not  
17 Crisis.” *Alzheimer Dis Assoc Disord* 2010;**24**:372–9.  
18 doi:10.1097/WAD.0b013e3181e9f829  
19
- 20 62 Costa N, Wübker A, De Mauléon A, *et al.* Costs of Care of Agitation Associated With  
21 Dementia in 8 European Countries: Results From the RightTimePlaceCare Study. *J Am*  
22 *Med Dir Assoc* 2018;**19**:95.e1-95.e10. doi:10.1016/j.jamda.2017.10.013  
23  
24
- 25 63 Dichter MN, Schwab CGG, Meyer G, *et al.* Item distribution, internal consistency and  
26 inter-rater reliability of the German version of the QUALIDEM for people with mild to  
27 severe and very severe dementia. *BMC Geriatr* 2016;**16**. doi:10.1186/s12877-016-0296-0  
28  
29
- 30 64 Dichter M, Dortmann O, Halek M, *et al.* Scalability and internal consistency of the  
31 German version of the dementia-specific quality of life instrument QUALIDEM in  
32 nursing homes – a secondary data analysis. *Health Qual Life Outcomes* 2013;**11**:91.  
33 doi:10.1186/1477-7525-11-91  
34
- 35 65 Schulz KF, Grimes DA. Blinding in randomised trials: hiding who got what. *The Lancet*  
36 2002;**359**:696–700. doi:10.1016/S0140-6736(02)07816-9  
37  
38
- 39 66 Leon J, Cheng CK, Neumann PJ. Alzheimer’s disease care: costs and potential savings.  
40 *Health Aff Proj Hope* 1998;**17**:206–16.  
41  
42  
43  
44  
45  
46  
47  
48  
49  
50  
51  
52  
53  
54  
55  
56  
57  
58  
59  
60

## Figure Titles and Legends

Figure 1: QUALIDEM subdomain scores by care ward in patients with mild to severe dementia (MMSE score from 7 to 27, n = 400)

Figure 2: QUALIDEM subdomain scores by care ward, patients with very severe dementia (MMSE score < 7, n = 126)

Figure 3: Predictors of Health Related Quality of Life, Regression Coefficients, Bayesian Linear Mixed Model, Posterior Median (+50% and 89% High Density Interval)

## Supplementary Files

Supplementary File 1: Figure, Distribution of Patients' Main Diagnosis by Hospital

Supplementary File 2: Methodological comments, Word document (docx-format).

Supplementary File 3: Regression Models with Interaction Terms, Word document (docx-format).

Supplementary File 4: R Source Code (to use with R statistics, CC BY-NC 4.0 license)

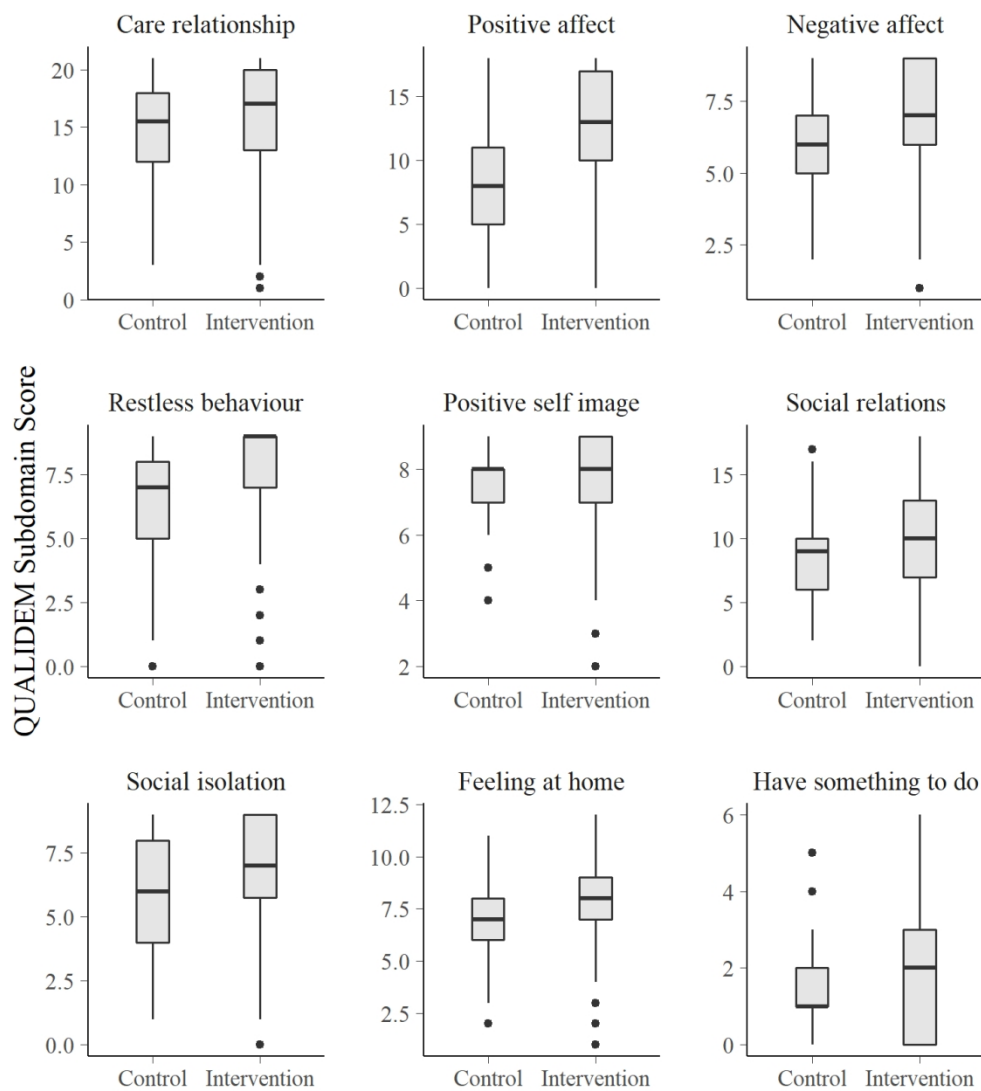

Figure 1: QUALIDEM subdomain scores by care ward in patients with mild to severe dementia (MMSE score from 7 to 27, n = 400)

169x189mm (220 x 220 DPI)

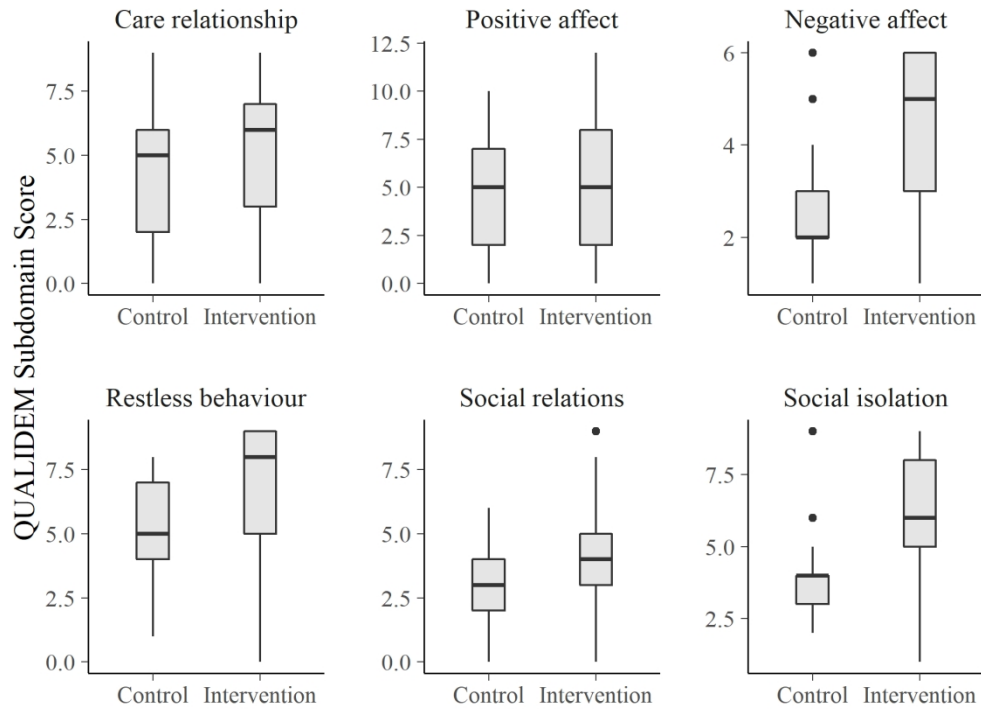

Figure 2: QUALIDEM subdomain scores by care ward, patients with very severe dementia (MMSE score < 7, n = 126)

169x125mm (300 x 300 DPI)

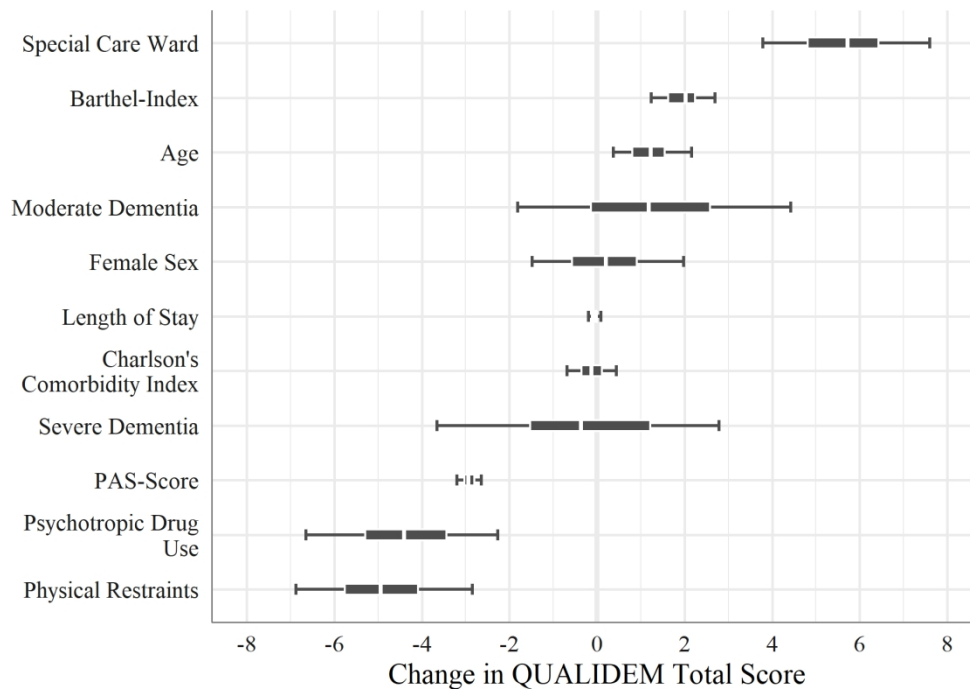

Figure 3: Predictors of Health Related Quality of Life, Regression Coefficients, Bayesian Linear Mixed Model, Posterior Median (+50% and 89% High Density Interval)

169x119mm (300 x 300 DPI)

## Main Diagnosis by Hospital Ward

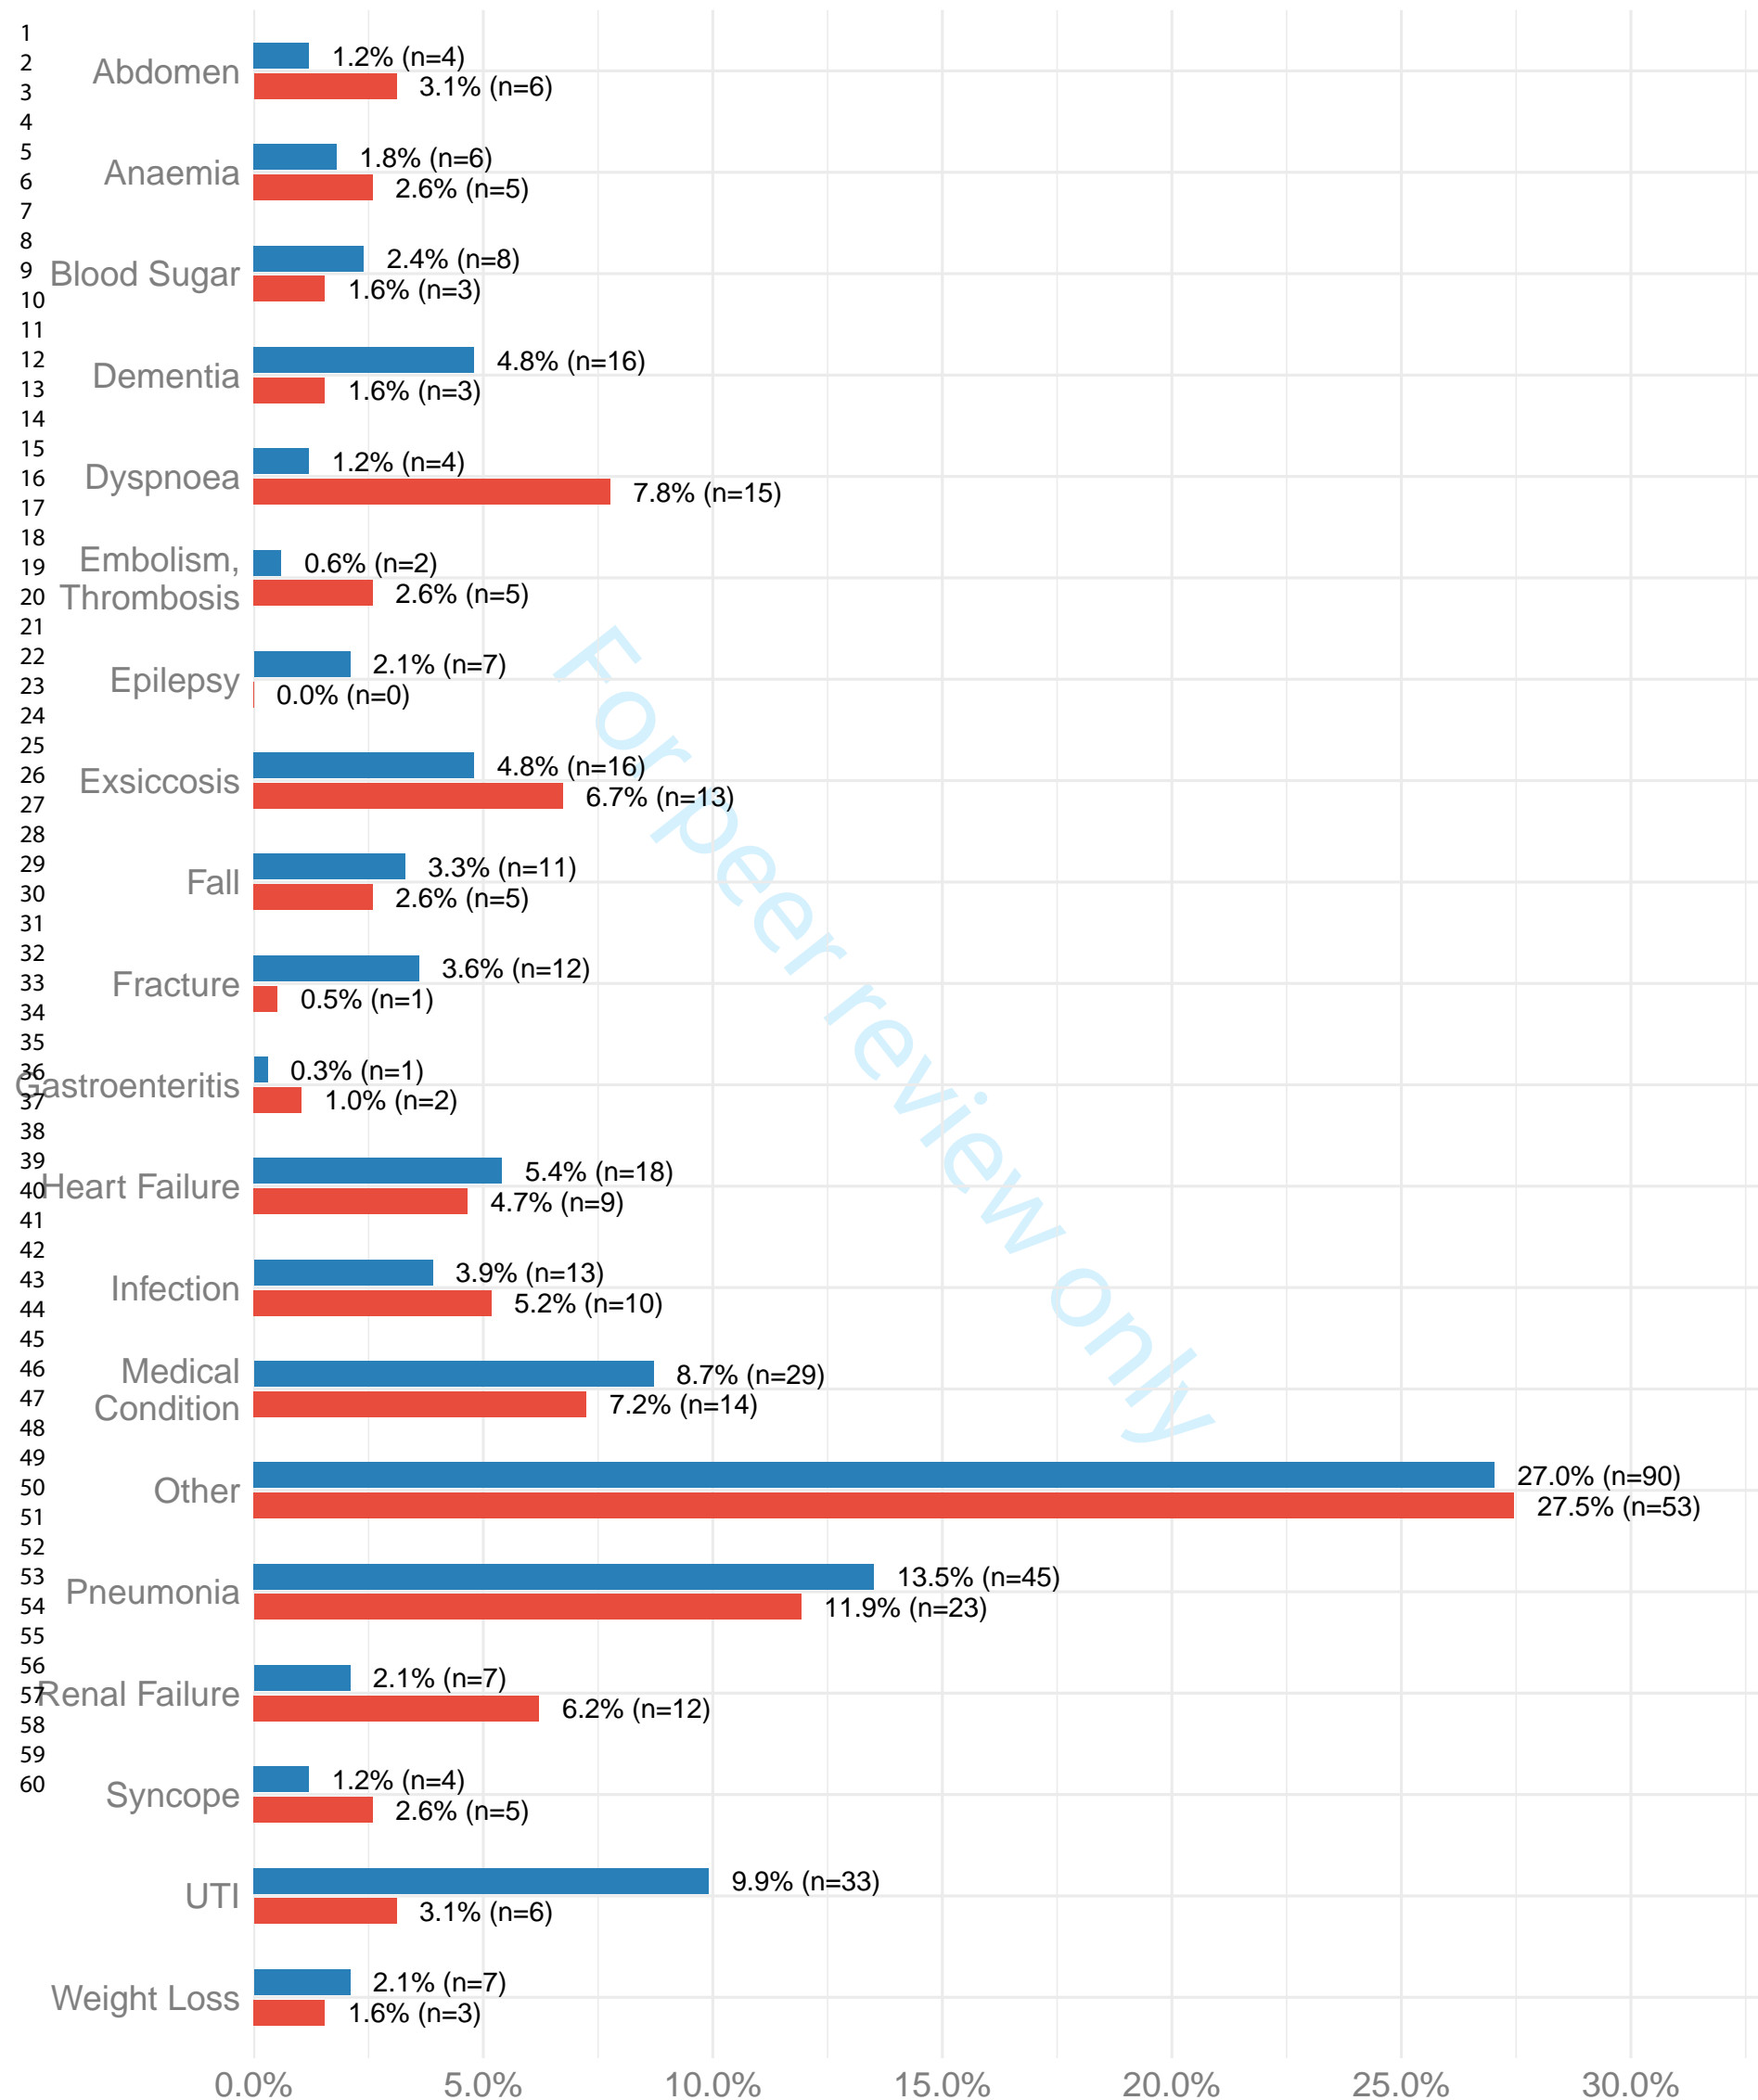

## Supplemental Material 2

### Quality of Life of Patients with Dementia in Acute Hospitals: Comparing a regular ward to a special care ward with dementia care concept. A Bayesian Multilevel Model Analysis.

#### Methodological comments

##### *1. Short note on Bayesian Methods*

Bayesian methods are probably not very common, and readers may ask “Why use Bayesian regression models?” Gelman et al.<sup>1</sup> give a well summarized answer to this question: “A pragmatic rationale for the use of Bayesian methods is the inherent flexibility introduced by their incorporation of multiple levels of randomness and the resultant ability to combine information from different sources, while incorporating all reasonable sources of uncertainty in inferential summaries. Such methods naturally lead to smoothed estimates in complicated data structures and consequently have the ability to obtain better real-world answers.”<sup>1</sup>. Shortly speaking, advantages of Bayesian methods are, for instance, the ability to derive probability statements for every quantity of interest or explicitly incorporate prior knowledge about parameters into the model.

##### *2. Distribution of Posterior Samples from the Regression Model*

Contrary to a frequentist approach, there is no unique point estimate in Bayesian analysis. The posterior median minimises the expected absolute error (i.e. the difference of estimates from true values over posterior samples), but there are many other plausible values to describe the association between predictors and outcome, which is called the *distribution of posterior samples*. Credible or Highest Density Intervals are based on quantiles of this distribution and indicate the probability of an estimate being inside this interval. In terms of inference, this allows us to say that with, e.g. 50% probability, the true effect of a *Special Care Ward* on our outcome lies between 5.1 and 6.6. Figure S1 shows the distribution of posterior samples from our regression model.



**Figure S1: Distribution of Posterior Samples from Regression Model**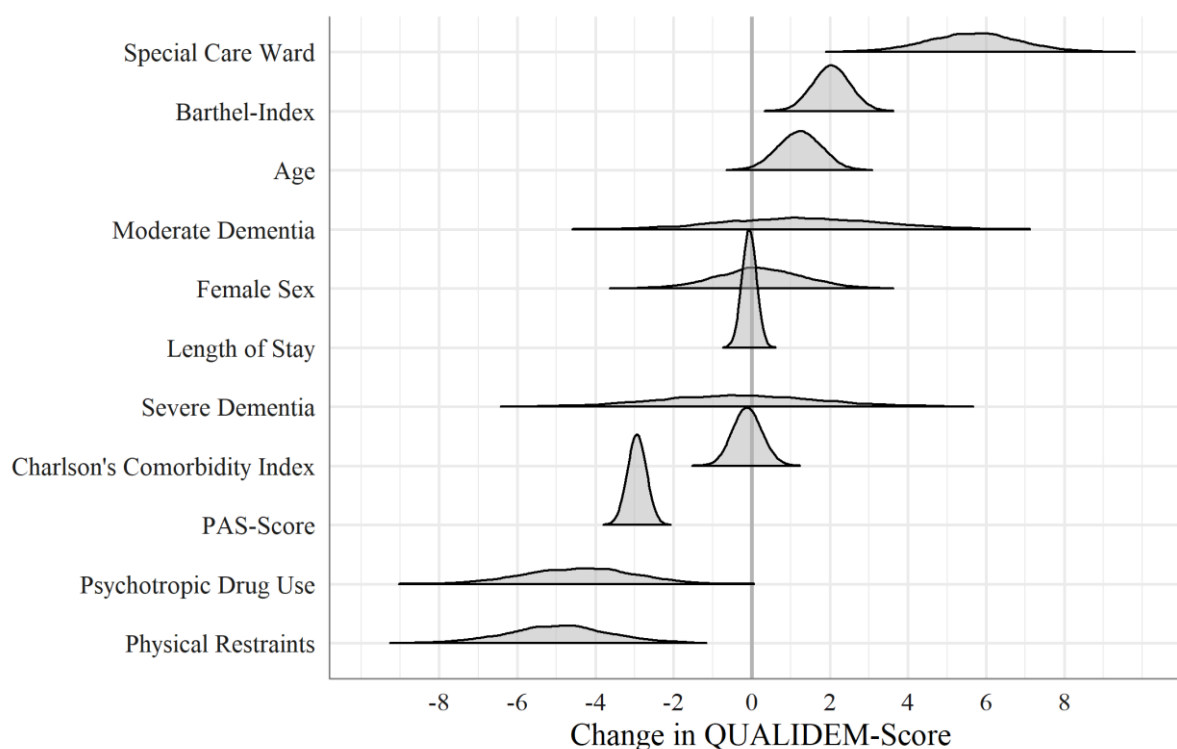

### 3. Tabular Summary from the Regression Model

Table S1 provides a summary of the regression model, including the data for two different Highest Density Intervals as well as the ratio of effective number of samples. The ratio should be 1.0 or close to 1.0 and indicates whether the samples were efficient, which means that the results for the related coefficient are reliable. Furthermore, all  $R_{hat}$  values of the models were approximately 1. The  $R_{hat}$  statistic<sup>2</sup> measures the ratio of the average variance of the draws within each chain to the variance of the pooled draws across chains. If the chains have not converged to a common distribution, the  $R_{hat}$  statistic will tend to be greater than one, indicating that more iterations may be required for reliable results.

**Table S1:** Predictors of Quality of Life, Regression Coefficients, Bayesian Linear Mixed Model, Posterior Median (+50% and 89% Highest Density Intervals)

| Term                                   | Estimate | SE  | 50% HDI     | 89% HDI     | Ratio of effective Number of Samples |
|----------------------------------------|----------|-----|-------------|-------------|--------------------------------------|
| (Intercept)                            | 46.2     | 2.2 | 45.2 – 48.2 | 42.7 – 49.8 | 1.00                                 |
| Length of Stay                         | -0.1     | 0.1 | -0.1 – 0.0  | -0.2 – 0.1  | 1.00                                 |
| Age                                    | 1.2      | 0.5 | 0.8 – 1.5   | 0.4 – 2.1   | 1.00                                 |
| Moderate Dementia                      | 1.2      | 2.0 | -0.1 – 2.7  | -1.8 – 4.6  | 1.00                                 |
| Severe Dementia                        | -0.4     | 2.0 | -1.6 – 1.1  | -3.6 – 2.7  | 1.00                                 |
| Female                                 | 0.2      | 1.1 | -0.5 – 1.0  | -1.6 – 1.9  | 1.00                                 |
| Barthel Score                          | 2.0      | 0.5 | 1.8 – 2.4   | 1.3 – 2.8   | 1.00                                 |
| Physical Restraints (yes)              | -4.9     | 1.2 | -5.8 – -4.1 | -7.0 – -2.8 | 1.00                                 |
| Special Care Ward (Intervention)       | 5.7      | 1.2 | 4.9 – 6.5   | 3.8 – 7.6   | 1.00                                 |
| PAS-Score                              | -2.9     | 0.2 | -3.1 – -2.8 | -3.2 – -2.7 | 1.00                                 |
| Charlson's Comorbidity Index           | -0.1     | 0.3 | -0.4 – 0.1  | -0.6 – 0.5  | 1.00                                 |
| Psychotropic Drug Use (yes, as-needed) | -4.4     | 1.4 | -5.3 – -3.5 | -6.5 – -2.1 | 1.00                                 |
| sigma                                  | 11.9     | 0.4 | 11.5 – 12.0 | 11.3 – 12.5 | 1.00                                 |

All Rhat values  $\sim 1$ , all mcse  $< 0.05$ . Results based on 4 chains each 1000 iterations for each chain. LOO-adjusted  $R^2$ : 0.500

#### 4. Test for Practical Equivalence of Parameters

Bayesian methods do not perform classical “null hypothesis significance tests”. Rather, to account for the uncertainty in estimation and the magnitude of parameter values, Kruschke<sup>3</sup> suggests checking whether parameter values lie inside a certain range that is considered as “practically no effect”.

Figure S2 shows the distribution of the 95% Highest Density Intervals of posterior samples and indicates whether these lie completely outside, completely inside or partially inside the region of practical equivalence (ROPE). If the HDI is completely outside the ROPE, the “null hypothesis” for this parameter is “rejected”. If the ROPE completely covers the HDI, i.e. all most credible values of a parameter are inside the region of practical equivalence, the null hypothesis is accepted. Else, it is undecided whether to accept or reject the null hypothesis.

The ROPE limits are specified following Kruschke's suggestion, which is defined as  $0 \pm SD(\text{dependent variable}) * 0.1$  for linear models.

Physical restraint, psychotropic drug use, agitation (PAS-score) and the intervention (special care ward) are those predictors that can be considered as relevant for our outcome.

**Figure S2:** 95%-Range of the Distribution of Posterior Samples from Regression Model; Region of Practical Equivalence emphasized in light-blue.



### 5. Summary of the Distribution of Prior and Posterior Samples

Bayesian regression models can incorporate prior information about the parameters. Informative or weakly informative priors have the advantage of regularization of parameters to rule out large effects. This leads to less biased results and reductions of outliers in situations where the sample size in general, or for certain groups in the data, is small. Where we found information about our parameters, we included it by specifying *informative priors*. For instance, studies suggest that physical restraints are, on average, associated with an about 5-point reduction in quality of life, so the *location* of the prior distribution of our parameter physical restraint is at -5.0 (see Table S2). *Weakly informative priors* simply have a location of zero.

**Table S2: Prior Summary**

| Predictor                    | Location | Scale |
|------------------------------|----------|-------|
| Length of Stay               | 0.00     | 6     |
| Age                          | 0.16     | 40    |
| Moderate dementia            | 0.00     | 42    |
| Severe dementia              | -0.44    | 42    |
| Sex, female                  | -3.22    | 42    |
| Barthel-Score                | 0.00     | 29    |
| Physical restraints          | -5.00    | 42    |
| Special Care Ward            | 0.00     | 42    |
| PAS-Score                    | 0.00     | 13    |
| Charlson's Comorbidity Index | 0.00     | 27    |
| Psychotic Drug Use           | 0.29     | 42    |

To prevent a too strong shrinkage of uncertainty, the *scale* of the prior distribution should be large enough. If no assumptions about the scale of the effect are made, a recommended way (for normally distributed priors) is to use a scale of 2.5 and adjust it by dividing the scale by the standard deviation of the related predictor and multiply it with the standard deviation of the outcome ( $2.5 * SD(y) / SD(x)$ , see <https://cran.r-project.org/web/packages/rstanarm/vignettes/priors.html>).

When the evidence in the data is *strong*, the impact of the prior information is rather low. On the other hand, if the evidence of the data is *weak*, for instance due to small sample size, the impact of the prior information increases. Figure S3 shows the summary of the prior and posterior sample distributions and suggests that the evidence in the data was rather strong and results were not biased due to unrealistic prior information.

**Figure S3: Posterior versus Prior Summary**

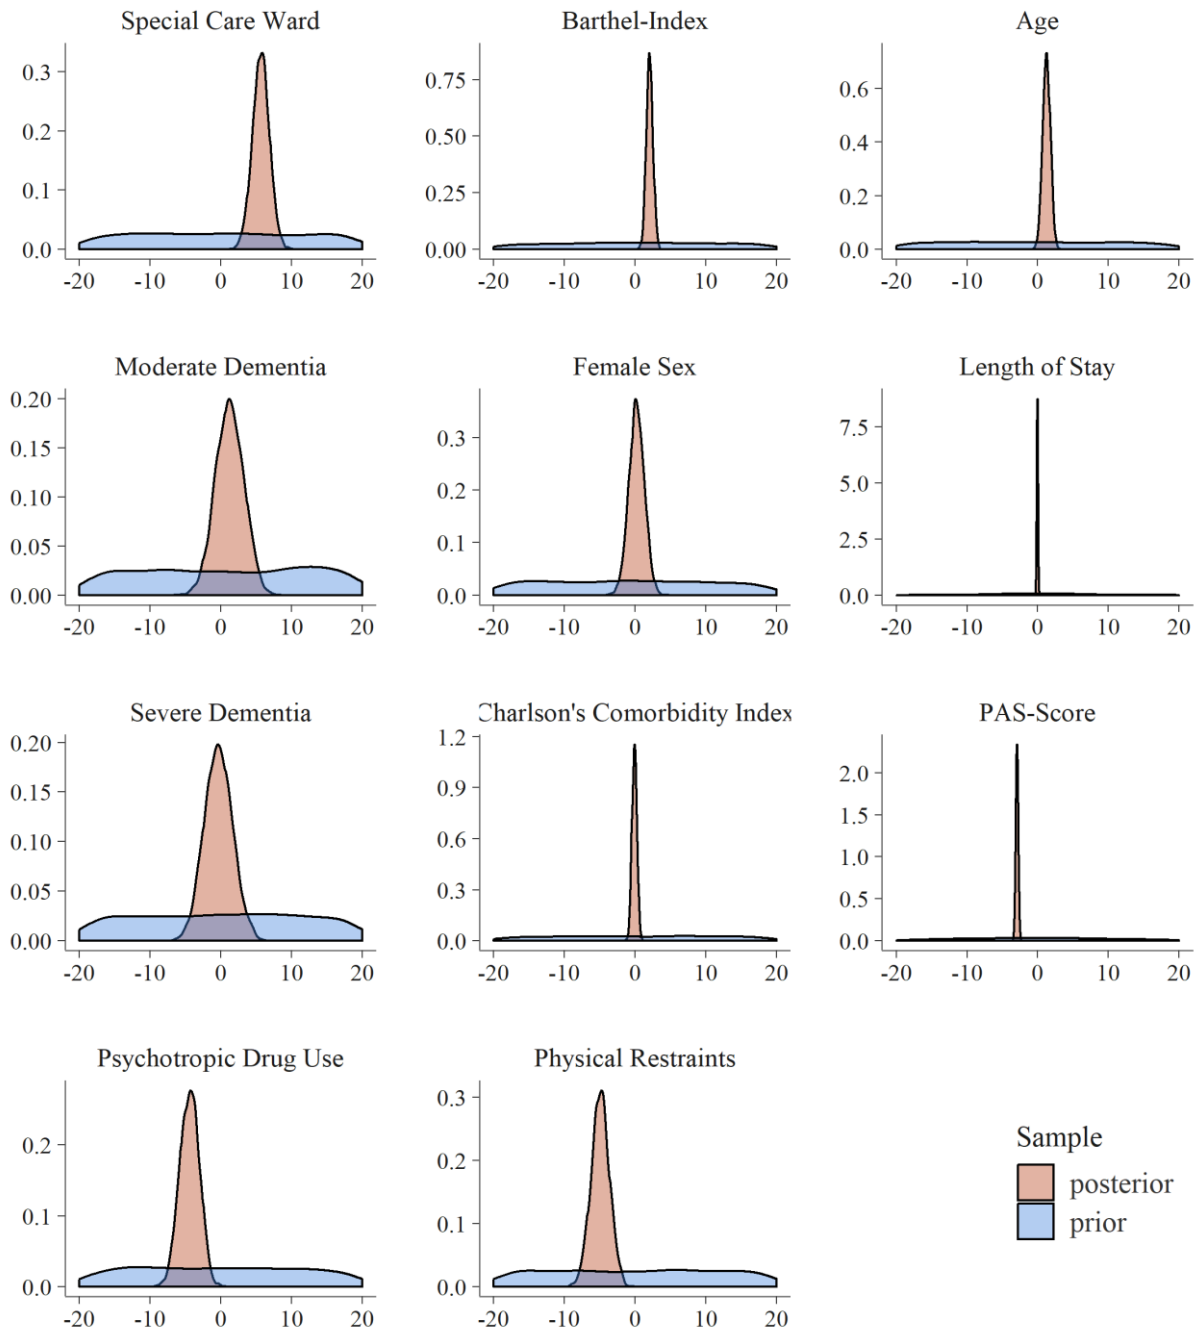

## 6. Trace plots

A trace plot provides a visual way to inspect sampling the behaviour and can be used, besides the Rhat-statistics, to assess convergence. The desired pattern is a “fat, hairy caterpillar”, which shows no suspicious bends<sup>4, 5</sup>. If the chains converged to the posterior distribution, we can be confident in our model-based inferences.

The trace plot in Figure S4 indicates that all chains have converged well.

**Figure S4:** Markov Chain trace plot, 4 chains with 1000 iterations each (excluding warmup-samples)

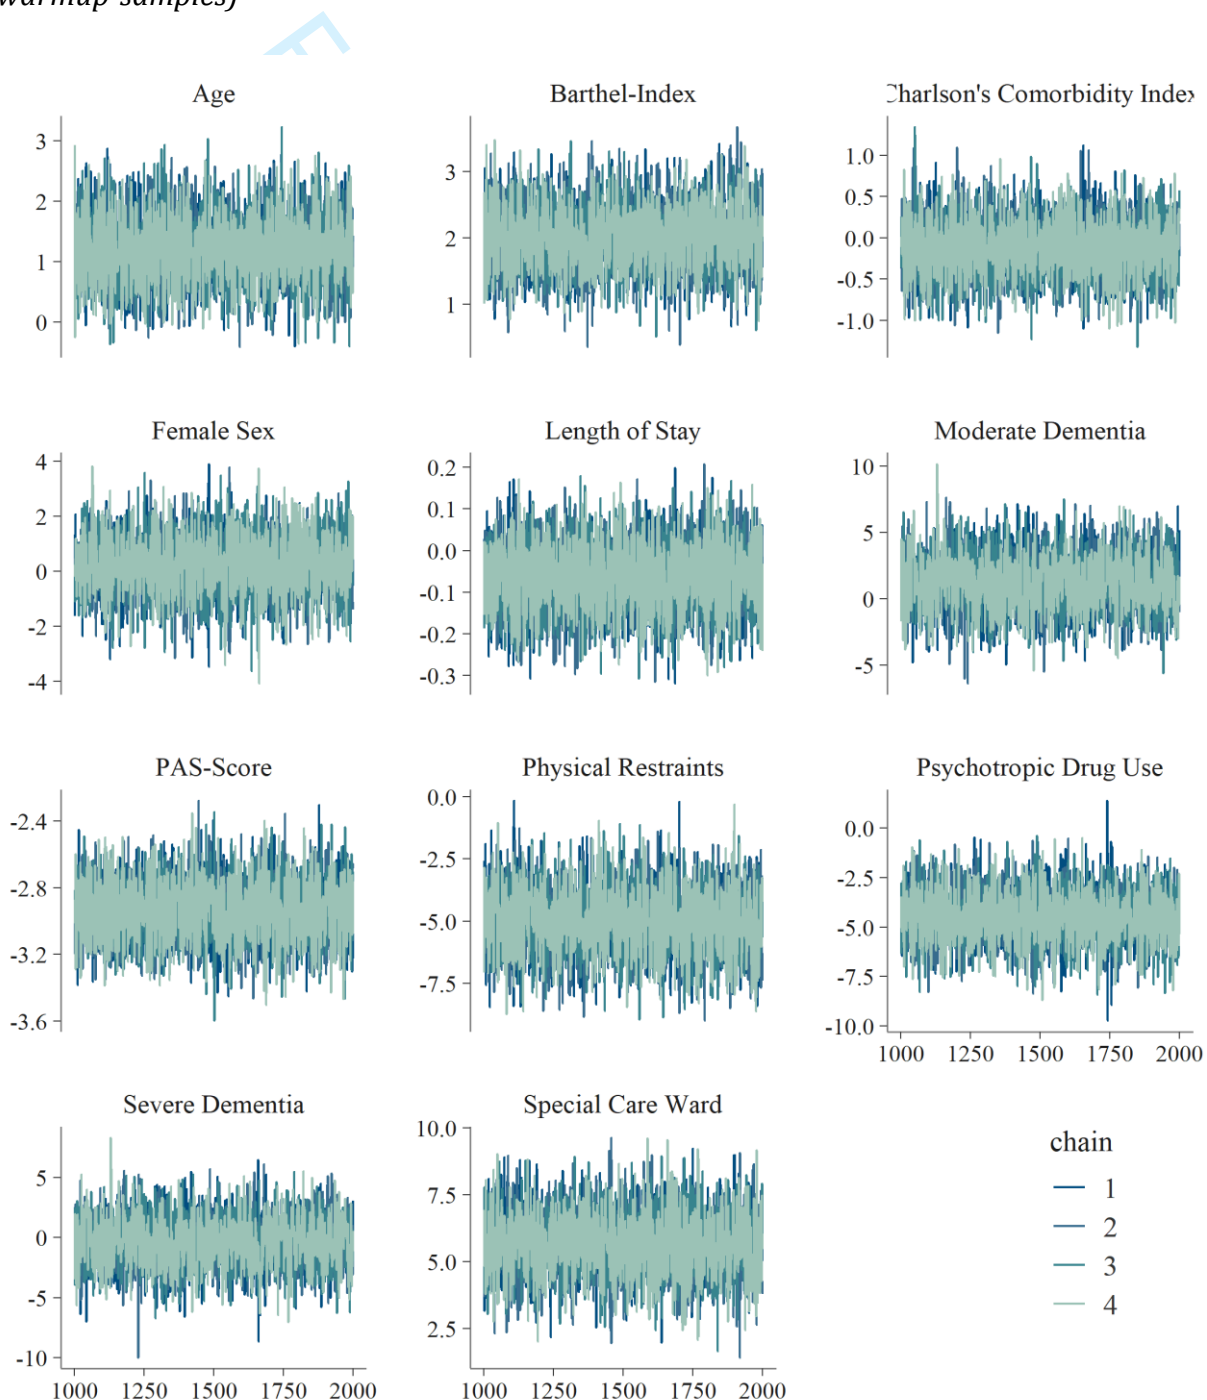

## 7. References

1. Gelman A, Carlin JB, Stern HS, Dunson DB, Vehtari A, Rubin DB. Bayesian Data Analysis. Third edition. Boca Raton: CRC Press; 2014: p.24
2. Gelman A, Rubin DB. Inference from Iterative Simulation Using Multiple Sequences. *Statistical Science*. 1992;7(4):457-472. doi:10.1214/ss/1177011136
3. Kruschke JK. Rejecting or Accepting Parameter Values in Bayesian Estimation. *Advances in Methods and Practices in Psychological Science*. 2018; doi: 10.1177/2515245918771304
4. Sorensen T, Hohenstein S, Vasishth S. Bayesian linear mixed models using Stan: A tutorial for psychologists, linguists, and cognitive scientists. *The Quantitative Methods for Psychology*. 2016;12:175–200.
5. Lunn D, Jackson C, Best N, Thomas A, Spiegelhalter D. *The BUGS book: a practical introduction to Bayesian analysis*. Boca Raton, FL: CRC Press, Taylor & Francis Group; 2013.

### Supplemental Material 3

To see if the complexity of patients' needs affect our findings, we calculated regression models with interaction terms between need factors moderated by hospitals. The figures S5 to S8 show the results of the interaction terms. Table S3 shows the coefficients in details. We found no "significant" associations for the interaction terms, concluding that the association between complexity of patients' needs and quality of life is not differing noticeably between the intervention and control group.

Plots were created using the *ggeffects* package in R (Lüdtke D. *ggeffects*: Tidy Data Frames of Marginal Effects from Regression Models. *Journal of Open Source Software*. 2018;3: 772. doi:10.21105/joss.00772).

**Figure S5:** Interaction between Barthel-Index and Intervention/Control-Group

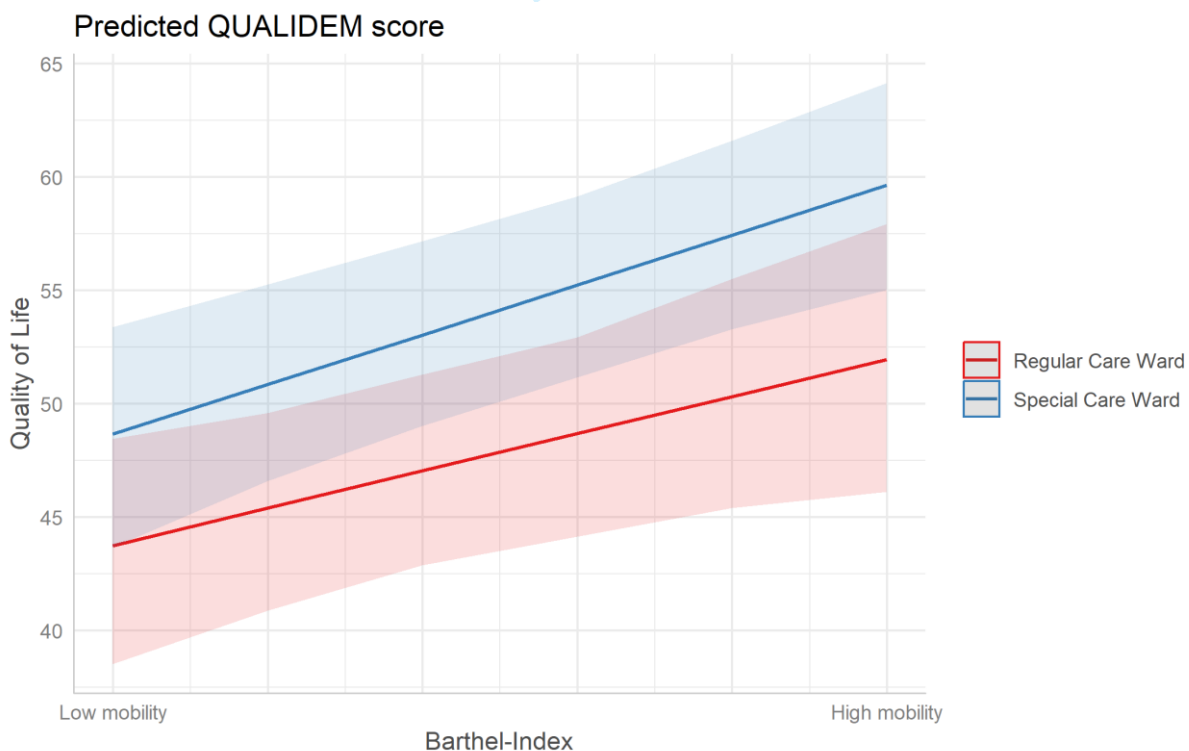



**Figure S6:** Interaction between Physical Restraints and Intervention/Control-Group

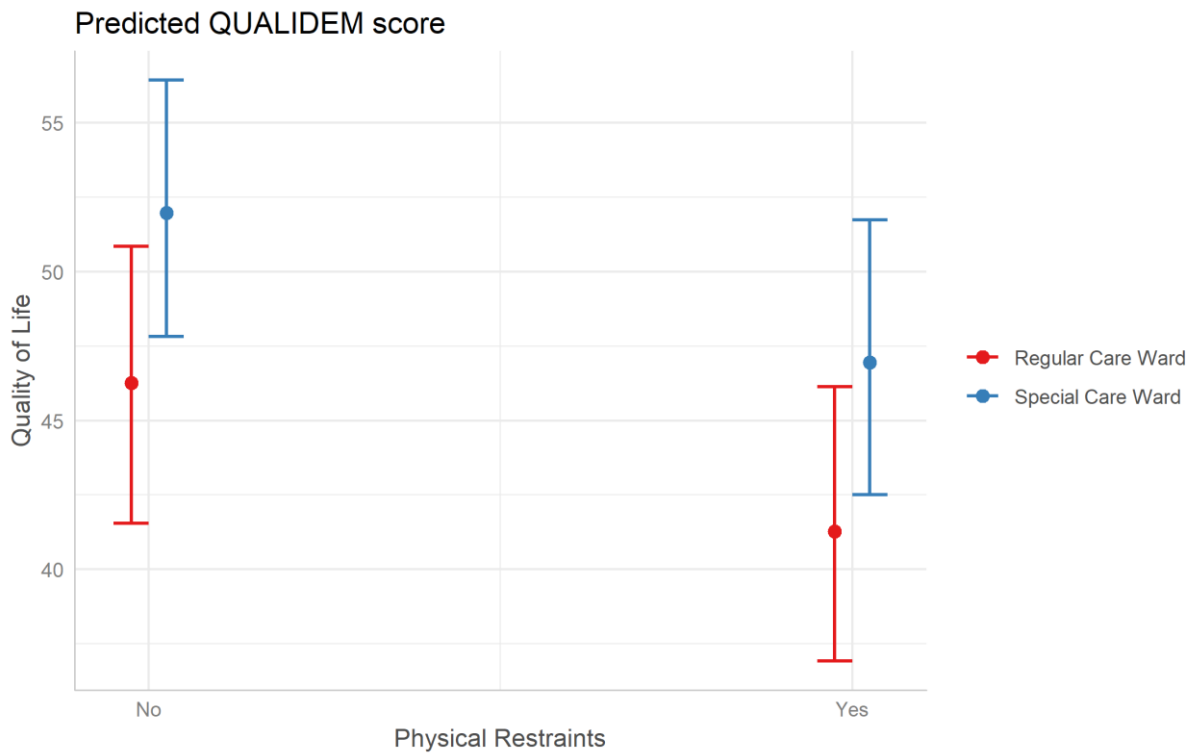

**Figure S7:** Interaction between PAS and Intervention/Control-Group

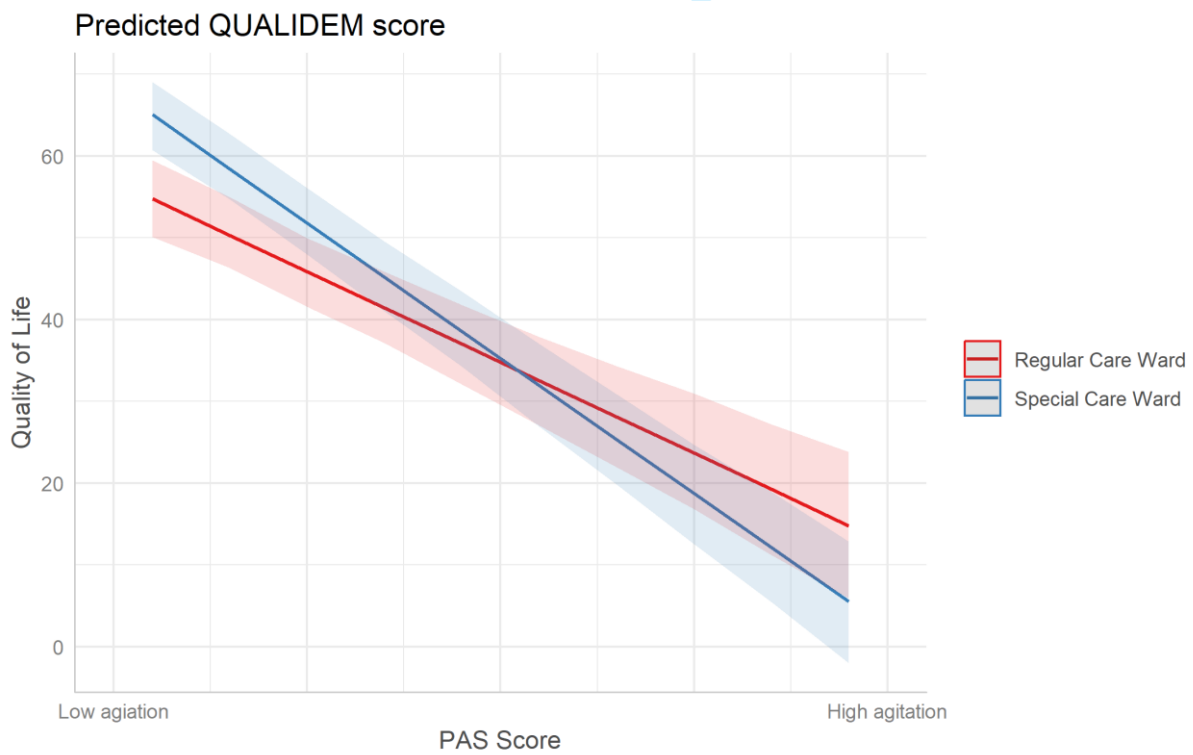

**Figure S8:** Interaction between Chemical Restraints and Intervention/Control-Group

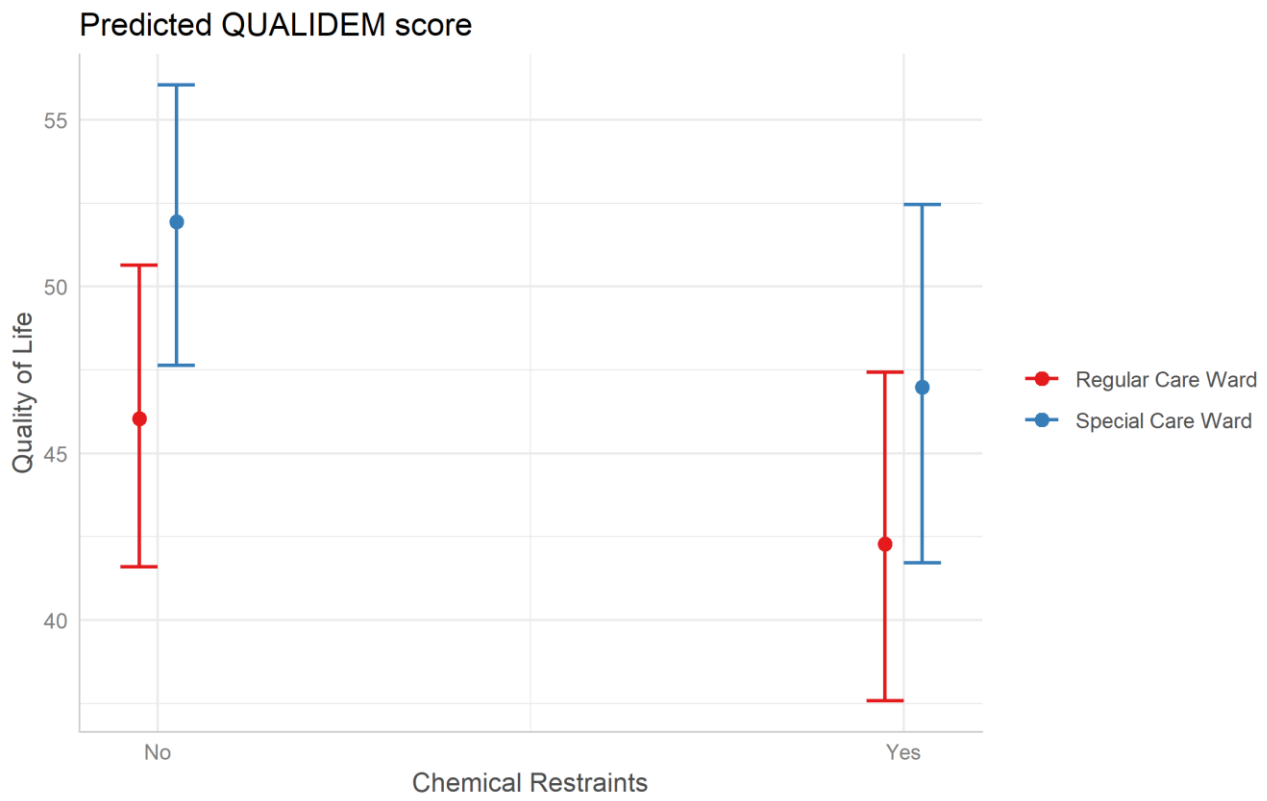

review only

**Table S3: Coefficients for Models with Interaction Terms**

| Terms                                  | Model: Interaction between Barthel and Hospital |               | Model: Interaction between Physical Restraints and Hospital |               | Model: Interaction between PAS and Hospital |               | Model: Interaction between Chemical Restraints and Hospital |               |
|----------------------------------------|-------------------------------------------------|---------------|-------------------------------------------------------------|---------------|---------------------------------------------|---------------|-------------------------------------------------------------|---------------|
|                                        | Estimates                                       | HDI (95%)     | Estimates                                                   | HDI (95%)     | Estimates                                   | HDI (95%)     | Estimates                                                   | HDI (95%)     |
| (Intercept)                            | 36.18                                           | 26.19 – 45.67 | 36.31                                                       | 27.00 – 46.10 | 36.57                                       | 27.11 – 45.71 | 36.16                                                       | 26.45 – 45.69 |
| Length of Stay                         | -0.07                                           | -0.23 – 0.11  | -0.06                                                       | -0.23 – 0.09  | -0.07                                       | -0.23 – 0.10  | -0.06                                                       | -0.22 – 0.10  |
| Age                                    | 0.12                                            | 0.01 – 0.23   | 0.12                                                        | 0.02 – 0.23   | 0.12                                        | 0.01 – 0.22   | 0.12                                                        | 0.02 – 0.23   |
| Moderate Dementia                      | 1.21                                            | -2.79 – 5.13  | 1.19                                                        | -2.72 – 5.24  | 1.19                                        | -2.83 – 4.72  | 1.25                                                        | -2.95 – 4.89  |
| Severe Dementia                        | -0.34                                           | -4.30 – 3.70  | -0.44                                                       | -4.45 – 3.65  | -0.74                                       | -4.54 – 3.10  | -0.30                                                       | -4.45 – 3.59  |
| Female                                 | 0.16                                            | -2.06 – 2.29  | 0.19                                                        | -1.98 – 2.29  | 0.52                                        | -1.53 – 2.70  | 0.23                                                        | -1.76 – 2.53  |
| Charlson's Comorbidity Index           | -0.12                                           | -0.81 – 0.59  | -0.11                                                       | -0.77 – 0.64  | -0.11                                       | -0.77 – 0.59  | -0.11                                                       | -0.82 – 0.59  |
| Barthel Score                          | 1.66                                            | 0.27 – 2.99   | 2.02                                                        | 1.15 – 2.88   | 2.07                                        | 1.17 – 2.97   | 2.05                                                        | 1.13 – 2.98   |
| Physical Restraints (yes)              | 5.74                                            | 3.48 – 7.90   | 5.76                                                        | 2.67 – 8.72   | 5.95                                        | 3.64 – 8.18   | 5.94                                                        | 3.44 – 8.62   |
| Special Care Ward (Intervention)       | -5.02                                           | -7.65 – -2.54 | -4.92                                                       | -8.57 – -1.11 | -4.94                                       | -7.60 – -2.41 | -4.96                                                       | -7.83 – -2.58 |
| PAS-Score                              | -2.96                                           | -3.30 – -2.62 | -2.94                                                       | -3.30 – -2.61 | -2.22                                       | -2.77 – -1.66 | -2.93                                                       | -3.27 – -2.59 |
| Psychotropic Drug Use (yes, as-needed) | -4.43                                           | -7.10 – -1.83 | -4.40                                                       | -7.08 – -1.87 | -4.30                                       | -6.81 – -1.56 | -3.76                                                       | -7.83 – -0.03 |
| Barthel * Intervention                 | 0.52                                            | -1.00 – 2.06  |                                                             |               |                                             |               |                                                             |               |
| Phys. Restr. * Intervention            |                                                 |               | -0.09                                                       | -4.46 – 4.66  |                                             |               |                                                             |               |
| PAS * Intervention                     |                                                 |               |                                                             |               | -1.09                                       | -1.76 – -0.42 |                                                             |               |
| Chem. Restr. * Intervention            |                                                 |               |                                                             |               |                                             |               | -1.15                                                       | -6.63 – 4.27  |

## Supplemental Material 4 – R Source Code

```

1
2 library(tidyverse)
3 library(gggridges)
4 library(sjmisc)
5 library(sjlabelled)
6 library(sjstats)
7 library(sjPlot)
8 library(insight)
9 library(bayestestR)
10 library(brms)
11
12 # Data available at https://doi.org/10.5281/zenodo.1479676
13
14 # load data ----
15
16 load("Dataset.RData")
17
18 # divide age by 10
19
20 d$age10 <- d$age / 10
21
22 # Labels for final model ----
23
24 labs <-
25   c(
26     stay_c = "Length of Stay",
27     age = "Age",
28     age10 = "Age",
29     mmse2 = "Moderate Dementia",
30     mmse3 = "Severe Dementia",
31     sex2 = "Female Sex",
32     barthel_code = "Barthel-Index",
33     groupintervention = "Special Care Ward",
34     physres1 = "Physical Restraints",
35     pas_c = "PAS-Score",
36     cci_c = "Charlson's Comorbidity Index",
37     chemicalres1 = "Psychotropic Drug Use", # oder as-needed
38     b_stay_c = "Length of Stay",
39     b_age = "Age",
40     b_age10 = "Age",
41     b_mmse2 = "Moderate Dementia",
42     b_mmse3 = "Severe Dementia",
43     b_sex2 = "Female Sex",
44     b_barthel_code = "Barthel-Index",
45     b_groupintervention = "Special Care Ward",
46     b_physres1 = "Physical Restraints",
47     b_pas_c = "PAS-Score",
48     b_cci_c = "Charlson's Comorbidity Index",
49     b_chemicalres1 = "Psychotropic Drug Use" # oder as-needed
50   )
51
52 # prior-definition in brms ----
53
54 # scale is 2.5 * sd(y) / sd(x)
55
56 bprior <-
57   prior(normal(0, 6), class = "b", coef = "stay_c") +
58   prior(normal(.1554, 40), class = "b", coef = "age10") +
59   prior(normal(0, 42), class = "b", coef = "mmse2") +
60   prior(normal(-.444, 42), class = "b", coef = "mmse3") +
61   prior(normal(-3.219, 42), class = "b", coef = "sex2") +
62   prior(normal(0, 29), class = "b", coef = "barthel_code") +
63   prior(normal(-5, 42), class = "b", coef = "physres1") +
64   prior(normal(0, 42), class = "b", coef = "groupintervention") +
65   prior(normal(0, 13), class = "b", coef = "pas_c") +
66   prior(normal(.2925, 42), class = "b", coef = "chemicalres1") +
67   prior(normal(0, 26.77), class = "b", coef = "cci_c")
68
69 # see:
70 # Beerens HC, Sutcliffe C, Renom-Guiteras A, et al. Quality of Life and
71 # Quality of Care for People With Dementia Receiving Long Term Institutional
72 # Care or Professional Home Care: The European RightTimePlaceCare Study.

```

```

1 # Journal of the American Medical Directors Association. 2014;15(1):54-61.
2 # doi:10.1016/j.jamda.2013.09.010
3 #
4 # QoL-Scale ranges from 13-52 (40 points). Effects from those study are
5 # multiplied by 2.5 (rescaling 40-points to 100-point-scale of QUALIDEM)
6 # see:
7 # Barca, M. L., Engedal, K., Laks, J., & Selbæk, G. (2011). Quality of Life
8 # among Elderly Patients with Dementia in Institutions. Dementia and Geriatric
9 # Cognitive Disorders, 31(6), 435-442. https://doi.org/10.1159/000328969
10 # QoL-scale ranges from 11-55 (45 points). Effects from those study are
11 # multiplied by 2.2 (rescaling 45-points to 100-point-scale of QUALIDEM)
12
13 # model formula ----
14 mf <-
15   formula(
16     QoL ~ stay_c + age10 + mmse + sex + cci_c +
17     barthel_code + physres + group + pas_c +
18     chemicalres + (1 | maindiag)
19   )
20
21 # brms-model ----
22
23 set.seed(1207)
24
25 m2a <- brm(
26   formula = mf,
27   data = d,
28   prior = bprior,
29   sample_prior = TRUE
30 )
31
32 # Figure 3 ----
33 theme_set(theme_sjplot2(base_size = 14, base_family = "serif"))
34
35 p <- plot_model(
36   m2a,
37   title = "",
38   axis.labels = labs,
39   sort.est = T,
40   colors = c("grey30"),
41   axis.title = "Change in QUALIDEM-Score",
42   wrap.title = 100,
43   wrap.labels = 20,
44   width = .2,
45   grid.breaks = 2,
46   size.inner = .1
47 ) +
48   ylab("Change in QUALIDEM Total Score") +
49   theme_sjplot2(base_size = 14, base_family = "serif")
50
51 p_pdf <- p +
52   theme_sjplot2(base_size = 28, base_family = "serif") +
53   theme(
54     panel.grid.major = element_line(size = .1),
55     panel.grid.minor = element_line(size = .05),
56     axis.line.x = element_line(size = .15),
57     axis.line.y = element_line(size = .15)
58   )
59
60 ggsave(filename = "Fig3.tiff", plot = p, width = 170, height = 120, units = "mm", dpi = 300,
61 compression = "lzw")
62 ggsave(filename = "Fig3.pdf", scale = 2, plot = p_pdf, width = 170, height = 120, units = "mm",
63 dpi = 300)
64
65 # Appendix S1: Test for practical equivalence ----
66
67 rope(m2a, rope = c(-6, 6))

```

```

1 rope(m2a, rope = c(-7.5, 7.5))
2 equivalence_test(m2a, parameters = "^(?!prior)")
3 equivalence_test(m2a, parameters = "^(?!prior)") %>% plot()
4
5 # Appendix S1, Table Regression Coefficients ----
6
7 tab_df(tidy_stan(m2a, prob = c(.5, .89), digits = 1))
8
9 # Appendix S1, Prior Adjustment ----
10
11 insight::get_priors(m2a)
12
13 # Appendix S1, Figure distribution Posterior Samples ----
14
15 tmp <- m2a %>%
16   as_tibble() %>%
17   select(2:12) %>%
18   gather(key = "predictor", value = "estimate") %>%
19   to_factor(predictor)
20
21 tmp$predictor <- lvl_reorder(tmp$predictor, c(9, 4, 8, 3, 7, 11, 10, 6, 1, 2, 5))
22
23 p2 <- ggplot(tmp, aes(x = estimate, y = predictor)) +
24   geom_vline(xintercept = 0, colour = "grey70", size = .8) +
25   geom_density_ridges2(rel_min_height = 0.001, scale = 2, alpha = .5) +
26   scale_x_continuous(breaks = seq(-8, 8, 2)) +
27   scale_y_discrete(labels = labs) +
28   labs(x = "Change in QUALIDEM-Score", y = NULL) +
29   theme_sjplot2(base_size = 14, base_family = "serif")
30
31 ggsave(filename = "FigS1.tiff", plot = p2, width = 190, height = 120, units = "mm", dpi = 300)
32
33 # Appendix S1, test for practical equivalence ----
34
35 ## Short version
36
37 equivalence_test(m2a, parameters = "^(?!prior)")
38 equivalence_test(m2a, parameters = "^(?!prior)") %>% plot()
39
40 ## More beautiful tweaked version
41
42 tmp.hdi <- hdi(m2a, prob = .95) %>%
43   slice(c(-c(1, 13:23)))
44
45 tmp2 <- m2a %>%
46   as_tibble() %>%
47   select(2:12) %>%
48   map2_df(tmp.hdi$CI_low, function(x, y) {
49     x[x < y] <- NA
50     x
51   }) %>%
52   map2_df(tmp.hdi$CI_high, function(x, y) {
53     x[x > y] <- NA
54     x
55   }) %>%
56   gather(key = "predictor", value = "estimate") %>%
57   to_factor(predictor)
58
59 tmp2$predictor <- lvl_reorder(tmp2$predictor, c(9, 4, 8, 3, 7, 11, 10, 6, 1, 2, 5))
60
61 tmp2$grp <- dplyr::case_when(
62   tmp2$predictor %in% c("b_stay_c", "b_cci_c") ~ "reject",
63   tmp2$predictor %in% c("b_age10", "b_mmse2", "b_mmse3", "b_sex2", "b_barthel_code") ~
64   "undecided",
65   TRUE ~ "accept"
66 )
67
68 p3 <- ggplot(tmp2, aes(x = estimate, y = predictor, fill = grp)) +
69   # rope based on "equi_test(model)".

```

```

1   annotate("rect", xmin = -1.7, xmax = 1.7, ymin = 0, ymax = Inf, fill = sjplot_pal(palette =
2   "us")[1], alpha = 0.15) +
3   geom_vline(xintercept = 0, colour = "grey70", size = .8) +
4   geom_density_ridges2(rel_min_height = 0.01, scale = 2, alpha = .4) +
5   scale_x_continuous(breaks = seq(-8, 8, 2)) +
6   scale_y_discrete(labels = labs) +
7   scale_fill_manual(values = sjplot_pal()[c(3, 1, 7)]) +
8   labs(x = "Change in QUALIDEM-Score", y = NULL, fill = "Acceptance of Parameters") +
9   theme_sjplot2(base_size = 14, base_family = "serif") +
10  theme(
11    legend.title = element_text(size = 13),
12    legend.position = "bottom",
13    axis.line.x = element_line(colour = "grey50"),
14    axis.line.y = element_line(colour = "grey50")
15  )
16  ggsave(filename = "FigS2.tiff", plot = p3, width = 190, height = 120, units = "mm", dpi = 300)
17
18  # Appendix S1, Posterior-Prior-Check ----
19
20  ## Short version
21  plot_model(m2a, type = "diag", axis.lim = c(-20, 20))
22
23  ## More beautiful tweaked version
24  pr_samp <- prior_samples(m2a) %>%
25    select(starts_with("b_")) %>%
26    gather(key = "Term", value = "Estimate") %>%
27    mutate(Sample = "prior")
28
29  ps_samp <- posterior_samples(m2a) %>%
30    select(starts_with("b_"), -b_Intercept) %>%
31    gather(key = "Term", value = "Estimate") %>%
32    mutate(Sample = "posterior")
33
34  m_pp_data <- bind_rows(pr_samp, ps_samp) %>% to_factor(Term)
35  m_pp_data$Term <- lvls_reorder(m_pp_data$Term, rev(c(8, 3, 10, 4, 7, 5, 11, 6, 1, 2, 9)))
36
37  p4 <- ggplot(m_pp_data, aes(x = Estimate, fill = Sample)) +
38    geom_density(alpha = .4) +
39    scale_x_continuous(limits = c(-20, 20)) +
40    facet_wrap(
41      ~ Term,
42      scales = "free",
43      labeller = labeller(Term = labs),
44      nrow = 4
45    ) +
46    labs(x = NULL, y = NULL) +
47    bayesplot::theme_default(base_size = 13) +
48    theme(
49      axis.line.x = element_line(colour = "grey50"),
50      axis.line.y = element_line(colour = "grey50"),
51      axis.text = element_text(colour = "grey10"),
52      axis.title = element_text(colour = "black"),
53      # strip.background = element_rect(colour = "grey50", fill = "grey90"),
54      # strip.text = element_text(colour = "grey20"),
55      legend.title = element_text(colour = "grey10"),
56      legend.text = element_text(colour = "grey20"),
57      legend.position = c(.5, .15),
58      legend.justification = c(-2, 1)
59    ) +
60    scale_fill_manual(values = sjplot_pal("breakfast club")[c(1, 3)])
61
62  ggsave(filename = "FigS3.tiff", plot = p4, width = 190, height = 214, units = "mm", dpi = 300)
63
64  # Appendix S1, Traceplot ----
65
66  p <- rstan::traceplot(m2a$fit, pars = colnames(as.data.frame(m2a))[1:12], inc_warmup = F)
67  p$data$parameter <- as.character(p$data$parameter)
68  tmp <- p$data %>%
69    filter(parameter != "b_Intercept")

```

```
for (i in 1:length(labs)) {
1   if (names(labs)[i] %in% tmp$parameter) {
2     r <- which(tmp$parameter == names(labs)[i])
3     tmp$parameter[r] <- labs[i]
4   }
5 }
6 p5 <- ggplot(tmp, aes(x = iteration, y = value, colour = chain)) +
7   geom_line() +
8   facet_wrap(~parameter, scales = "free_y", ncol = 3) +
9   scale_color_manual(values = sjplot_pal("us", n = 4)) +
10  labs(x = NULL, y = NULL) +
11  bayesplot::theme_default(base_size = 13) +
12  theme(
13    axis.line.x      = element_line(colour = "grey50"),
14    axis.line.y      = element_line(colour = "grey50"),
15    axis.text        = element_text(colour = "grey10"),
16    axis.title       = element_text(colour = "black"),
17    # strip.background = element_rect(colour = "grey50", fill = "grey90"),
18    # strip.text       = element_text(colour = "grey20"),
19    legend.title     = element_text(colour = "grey10"),
20    legend.text      = element_text(colour = "grey20"),
21    legend.position  = c(.5, .15),
22    legend.justification = c(-4.2, 0.7)
23  )
24 ggsave(filename = "FigS4.tiff", compress = "lzw", plot = p5, width = 190, height = 214, units =
25 "mm", dpi = 300)
26
27
28
29
30
31
32
33
34
35
36
37
38
39
40
41
42
43
44
45
46
47
48
49
50
51
52
53
54
55
56
57
58
59
60
```



**STROBE 2007 (v4) Statement—Checklist of items that should be included in reports of case-control studies**

| Section/Topic             | Item # | Recommendation                                                                                                                                                                       | Reported on page # |
|---------------------------|--------|--------------------------------------------------------------------------------------------------------------------------------------------------------------------------------------|--------------------|
| <b>Title and abstract</b> | 1      | (a) Indicate the study’s design with a commonly used term in the title or the abstract                                                                                               | 1                  |
|                           |        | (b) Provide in the abstract an informative and balanced summary of what was done and what was found                                                                                  | 2                  |
| <b>Introduction</b>       |        |                                                                                                                                                                                      |                    |
| Background/rationale      | 2      | Explain the scientific background and rationale for the investigation being reported                                                                                                 | 4                  |
| Objectives                | 3      | State specific objectives, including any prespecified hypotheses                                                                                                                     | 4-5                |
| <b>Methods</b>            |        |                                                                                                                                                                                      |                    |
| Study design              | 4      | Present key elements of study design early in the paper                                                                                                                              | 5                  |
| Setting                   | 5      | Describe the setting, locations, and relevant dates, including periods of recruitment, exposure, follow-up, and data collection                                                      | 6-7                |
| Participants              | 6      | (a) Give the eligibility criteria, and the sources and methods of case ascertainment and control selection. Give the rationale for the choice of cases and controls                  | 6-7                |
|                           |        | (b) For matched studies, give matching criteria and the number of controls per case                                                                                                  |                    |
| Variables                 | 7      | Clearly define all outcomes, exposures, predictors, potential confounders, and effect modifiers. Give diagnostic criteria, if applicable                                             | 8-10               |
| Data sources/ measurement | 8*     | For each variable of interest, give sources of data and details of methods of assessment (measurement). Describe comparability of assessment methods if there is more than one group | 8-10               |
| Bias                      | 9      | Describe any efforts to address potential sources of bias                                                                                                                            | 10                 |
| Study size                | 10     | Explain how the study size was arrived at                                                                                                                                            | 7                  |
| Quantitative variables    | 11     | Explain how quantitative variables were handled in the analyses. If applicable, describe which groupings were chosen and why                                                         | 10-11              |
| Statistical methods       | 12     | (a) Describe all statistical methods, including those used to control for confounding                                                                                                | 10-11              |
|                           |        | (b) Describe any methods used to examine subgroups and interactions                                                                                                                  | 10-11              |
|                           |        | (c) Explain how missing data were addressed                                                                                                                                          | 10                 |
|                           |        | (d) If applicable, explain how matching of cases and controls was addressed                                                                                                          | N/A                |
|                           |        | (e) Describe any sensitivity analyses                                                                                                                                                | N/A                |
| <b>Results</b>            |        |                                                                                                                                                                                      |                    |

|                          |     |                                                                                                                                                                                                              |       |
|--------------------------|-----|--------------------------------------------------------------------------------------------------------------------------------------------------------------------------------------------------------------|-------|
| Participants             | 13* | (a) Report numbers of individuals at each stage of study—eg numbers potentially eligible, examined for eligibility, confirmed eligible, included in the study, completing follow-up, and analysed            | 12    |
|                          |     | (b) Give reasons for non-participation at each stage                                                                                                                                                         | N/A   |
|                          |     | (c) Consider use of a flow diagram                                                                                                                                                                           | N/A   |
| Descriptive data         | 14* | (a) Give characteristics of study participants (eg demographic, clinical, social) and information on exposures and potential confounders                                                                     | 12-13 |
|                          |     | (b) Indicate number of participants with missing data for each variable of interest                                                                                                                          | 12-13 |
| Outcome data             | 15* | Report numbers in each exposure category, or summary measures of exposure                                                                                                                                    | 12-13 |
| Main results             | 16  | (a) Give unadjusted estimates and, if applicable, confounder-adjusted estimates and their precision (eg, 95% confidence interval). Make clear which confounders were adjusted for and why they were included | 13-14 |
|                          |     | (b) Report category boundaries when continuous variables were categorized                                                                                                                                    | N/A   |
|                          |     | (c) If relevant, consider translating estimates of relative risk into absolute risk for a meaningful time period                                                                                             | N/A   |
| Other analyses           | 17  | Report other analyses done—eg analyses of subgroups and interactions, and sensitivity analyses                                                                                                               | N/A   |
| <b>Discussion</b>        |     |                                                                                                                                                                                                              |       |
| Key results              | 18  | Summarise key results with reference to study objectives                                                                                                                                                     | 15-16 |
| Limitations              | 19  | Discuss limitations of the study, taking into account sources of potential bias or imprecision.<br>Discuss both direction and magnitude of any potential bias                                                | 17-18 |
| Interpretation           | 20  | Give a cautious overall interpretation of results considering objectives, limitations, multiplicity of analyses, results from similar studies, and other relevant evidence                                   | 15-18 |
| Generalisability         | 21  | Discuss the generalisability (external validity) of the study results                                                                                                                                        | 18-19 |
| <b>Other information</b> |     |                                                                                                                                                                                                              |       |
| Funding                  | 22  | Give the source of funding and the role of the funders for the present study and, if applicable, for the original study on which the present article is based                                                | 20    |

\*Give information separately for cases and controls in case-control studies and, if applicable, for exposed and unexposed groups in cohort and cross-sectional studies.

**Note:** An Explanation and Elaboration article discusses each checklist item and gives methodological background and published examples of transparent reporting. The STROBE checklist is best used in conjunction with this article (freely available on the Web sites of PLoS Medicine at <http://www.plosmedicine.org/>, Annals of Internal Medicine at <http://www.annals.org/>, and Epidemiology at <http://www.epidem.com/>). Information on the STROBE Initiative is available at [www.strobe-statement.org](http://www.strobe-statement.org).

# BMJ Open

## Quality of Life of Patients with Dementia in Acute Hospitals: A non-randomised case-control-study comparing a regular ward to a special care ward with dementia care concept.

|                                 |                                                                                                                                                                                                                                                                                                                                                         |
|---------------------------------|---------------------------------------------------------------------------------------------------------------------------------------------------------------------------------------------------------------------------------------------------------------------------------------------------------------------------------------------------------|
| Journal:                        | <i>BMJ Open</i>                                                                                                                                                                                                                                                                                                                                         |
| Manuscript ID                   | bmjopen-2019-030743.R2                                                                                                                                                                                                                                                                                                                                  |
| Article Type:                   | Research                                                                                                                                                                                                                                                                                                                                                |
| Date Submitted by the Author:   | 26-Jul-2019                                                                                                                                                                                                                                                                                                                                             |
| Complete List of Authors:       | Lüdecke, Daniel; University Medical Center Hamburg-Eppendorf, Department of Medical Sociology<br>Poppele, Georg; Evangelisches Krankenhaus Alsterdorf<br>Klein, Jens; University Medical Center Hamburg-Eppendorf, Department of Medical Sociology<br>Kofahl, Christopher; University Medical Center Hamburg-Eppendorf, Department of Medical Sociology |
| <b>Primary Subject Heading</b>: | Patient-centred medicine                                                                                                                                                                                                                                                                                                                                |
| Secondary Subject Heading:      | Health services research, Nursing                                                                                                                                                                                                                                                                                                                       |
| Keywords:                       | Dementia < NEUROLOGY, Quality of Life, Acute Hospital, Quality of Care, INTERNAL MEDICINE                                                                                                                                                                                                                                                               |
|                                 |                                                                                                                                                                                                                                                                                                                                                         |

SCHOLARONE™  
Manuscripts

**Title**

Quality of Life of Patients with Dementia in Acute Hospitals: A non-randomised case-control-study comparing a regular ward to a special care ward with dementia care concept.

**Authors**

Daniel Lüdecke, Georg Poppele, Jens Klein, Christopher Kofahl

**Corresponding author**

Daniel Lüdecke

Department of Medical Sociology

University Medical Center Hamburg-Eppendorf

Martinistr. 52

20246 Hamburg

Germany

Email: [d.luedecke@uke.de](mailto:d.luedecke@uke.de)

ORCID iD: 0000-0002-8895-3206

Tel.: ++49 40 7410 52878

**Co-authors**

Georg Poppele, Evangelisches Krankenhaus Alsterdorf (Protestant Hospital Alsterdorf), Hamburg, Germany

Jens Klein, University Medical Center Hamburg-Eppendorf, Department of Medical Sociology, Hamburg, Germany

Christopher Kofahl, University Medical Center Hamburg-Eppendorf, Department of Medical Sociology, Hamburg, Germany

**Keywords**

Dementia, Quality of Life, Acute Hospital, Quality of Care, Internal Medicine

1  
2  
3 **Word Count:** 5.256 (excluding title page, abstract, strength and limitations, references,  
4 tables)  
5  
6  
7  
8  
9  
10  
11  
12  
13  
14  
15  
16  
17  
18  
19  
20  
21  
22  
23  
24  
25  
26  
27  
28  
29  
30  
31  
32  
33  
34  
35  
36  
37  
38  
39  
40  
41  
42  
43  
44  
45  
46  
47  
48  
49  
50  
51  
52  
53  
54  
55  
56  
57  
58  
59  
60

For peer review only

## Abstract

**Objectives:** To identify factors that predict the quality of life (QoL) of patients with dementia in acute hospitals and to analyse if a special care concept can increase the patients' QoL.

**Design:** A non-randomised case-control-study, including two internal medicine wards from hospitals in Hamburg, Germany.

**Setting and Participants:** In all, 526 patients with dementia from two hospitals were included in the study (intervention: n=333; control: n=193). Inclusion criteria was an at least mild cognitive impairment or dementia. The intervention group was a hospital with a special care ward for internal medicine focussing on patients with dementia. The control group was from a hospital with a regular care ward without special dementia care concept.

**Outcome Measures:** Our main outcome was the QoL (range 0-100) from patients with dementia in two different hospitals. A Bayesian multilevel analysis was conducted to identify predictors like age, dementia, agitation, physical and chemical restraints or functional limitations that affect QoL.

**Results:** QoL differs significantly between the control (40.7) and intervention group (51.2),  $p < 0.001$ . Regression analysis suggests that physical restraint (estimated effect: -4.9), psychotropic drugs use (-4.4) and agitation (-2.9) are negatively associated with QoL. After controlling for confounders, the positive effect of the special care concept remained (5.7).

**Conclusions:** A special care ward will improve the quality of care and has a positive impact on the QoL of patients with dementia. Health policies should consider the benefits of special care concepts and develop incentives for hospitals to improve the QoL and quality of care for these patients.

## Article Summary

### Strengths and Limitations

- This is one of the first studies to investigate quality of life of patients with dementia in acute internal medicine wards in Germany.
- The statistical method applied in this study explicitly incorporates and accounts for information and knowledge from previous research.
- There are no studies which have evaluated the reliability and validity for the use of the assessment instrument for our main outcome (quality of life) in hospitals settings.
- The structural differences between the hospitals from the control and intervention may limit the generalizability of the results regarding the benefit of special care concepts for regular internal medicine wards.

## Introduction

Acute hospitals face the challenge of an increase in old-age patients, which particularly affects internal medicine wards [1]. The average age of patients in internal medicine wards is above 70 years and may even come close to 80 years [2,3], leading to an increasing prevalence of cognitive impairments [4]. Although data on the occurrence of dementia or cognitive impairments of patients in hospitals is inconsistent, the larger proportion of studies report prevalence rates of about 40% [5–7].

Many hospitals are insufficiently prepared for patients with cognitive impairments, especially in acute care units predominantly focussing on somatic diseases [8]. Patients with cognitive impairments or dementia do not fit into the typical routines and standardised workflows of hospitals as these patients need more resources for care and treatment [9,10]. These patients often become disoriented, anxious, agitated and challenge hospital staff with erratic behaviour when placed in regular care wards. This results in an increased likelihood of falls, complications during the hospital stay and post-operative complications [11,12]. Hence, patients with dementia are a vulnerable group with a higher risk for long-lasting functional impairments [13,14].

To control the challenging behaviour of patients with dementia, a common practice – at least in German acute hospitals, and especially for older patients – is to use physical restraints like side rails to keep patients in bed, or chemical restraints such as the on-demand-use of psychotropic medication or hypnotics and sedatives [15,16]. This practise is not limited to German hospitals; however, there seems to be large variations between countries [17]. Physical and chemical restraints as well as anxiety and challenging behaviour are associated with poorer outcomes in quality of life [QoL] and quality of care of patients with dementia [18,19]. Therefore, hospitals in general, and specifically internal medicine wards with their increasing proportion of patients with



dementia, need to address these issues in order to improve the quality of care for these patients.

At least in Germany, there were lately no care concepts that fully address the needs of patients with dementia in internal medicine [20]. The special care ward “DAVID” in the Protestant Hospital Alsterdorf in Hamburg was one of the first internal medicine wards in Germany that implemented a comprehensive care concept for patients with dementia, aiming to improve the patients’ QoL during their hospital stay. QoL is an important indicator of quality of care and a major dimension when assessing patient reported outcomes, particularly in older people as global outcome measure for interventions [21,22]. The assumption of this care concept is that a special care ward for patients with dementia leads to better outcomes in QoL compared to regular internal medicine wards. A study (“DAVID 2”) was conducted to investigate the impact of such a care concept. This paper shows the results of this study and addresses two research questions. First, which factors predict the QoL of patients with dementia in acute hospitals? Second, beyond these factors, can a special care concept for patients with dementia in acute hospitals increase the patients’ QoL?

## Methods

### Study Design and Setting

The aim of this study was to compare the quality of care for patients with dementia within a specialised dementia care concept as opposed to regular care in acute hospitals. The present study was designed as a non-randomised case-control-study, including two internal medicine wards in two hospitals located in Hamburg, Germany. The intervention group was a hospital that implemented a special care ward for internal medicine focussing on patients with dementia. The control group was from a hospital

1  
2  
3 with a regular care ward for internal medicine, which had no special dementia care  
4  
5 concept.  
6  
7  
8  
9

### 10 **Intervention Group**

11  
12 The special care ward “DAVID” is an internal medicine ward in the Protestant Hospital  
13 Alsterdorf, a not-for-profit organization, and has 14 beds. In the year of data collection  
14 (2016), 349 patients were treated. The ward employed nine care workers as nursing  
15 staff.  
16  
17  
18  
19  
20

21 Key components of the special care concept are a) a specific architectural design,  
22 including a homelike lounge, a specific colouring of doors and walls, and a light concept  
23 with minimum 500 lux at eye level; b) doctors, nurses and service staff are trained in  
24 coping with challenging behaviour and other dementia related issues, like basal  
25 stimulation or validation therapy, but also included case conferences to discuss issues  
26 with current patients [23]; duration of training courses and case conferences was about  
27 one hour and were provided on a monthly basis by external instructors; additionally,  
28 twice per year, an internal training course was offered for employees, lasting for half a  
29 day; c) mobile devices for diagnostics, to perform as many treatments as possible in the  
30 different rooms of the special care ward; d) involvement of relatives into assessment,  
31 care and discharge planning; and e) regular therapeutic offers like occupational or  
32 speech therapy, and social offers like music, playing or spending more time than usual to  
33 care for the patients.  
34  
35  
36  
37  
38  
39  
40  
41  
42  
43  
44  
45  
46  
47  
48  
49  
50

51 To fulfil these high standards of quality of care, the ward “DAVID” employs more care  
52 staff in relation to the number of patients as compared to other regular internal  
53 medicine wards in Germany. With respect to the total number of full-time equivalents  
54 [FTE] nurses, the staff-patient-ratio is one FTE nurse per 39 patients.  
55  
56  
57  
58  
59  
60

1  
2  
3 The Protestant Hospital Alsterdorf has a second ward for internal medicine, however,  
4 patients with dementia were usually immediately transferred to the special care ward  
5 after admission to hospital. Thus, as almost no patients with dementia were treated in  
6 the second internal medicine ward, the control group was taken from another hospital.  
7  
8  
9  
10  
11  
12  
13  
14

### 15 **Control Group**

16  
17 The regular care ward is part of a larger private-company hospital with emergency  
18 hospitalisation. It has 80 beds and in the year of data collection, about 3.500 patients  
19 were treated in this internal medicine ward. Twenty-six employees worked as care staff  
20 in this ward. Trainees sometimes supported the care team. The staff-patient-ratio in the  
21 regular care ward is approximately one FTE nurse per 130 patients. However, since the  
22 internal medicine ward in this hospital also treats patients from the emergency  
23 ambulance, the staff-patient-ratio related to the number of patients who actually stayed  
24 longer in hospital (three days and more) is lower. Unfortunately, the hospital  
25 management was not willing to provide more detailed information beside the publicly  
26 available quality reports, so we cannot quantify the staff-patient-ratio exactly.  
27  
28  
29  
30  
31  
32  
33  
34  
35  
36  
37  
38  
39

40 The regular care ward had no specific care concept for dementia patients. The care staff  
41 was not particularly trained in dementia topics.  
42  
43  
44  
45  
46  
47

### 48 **Data collection and participants**

49 An assessment questionnaire was developed to obtain data from patients with dementia.  
50 Study nurses were trained in using this assessment questionnaire and then conducted  
51 the data collection in both hospitals. Two study nurses were responsible for the special  
52 care ward and one for the regular care ward. A pre-test of two months was conducted to  
53 test and revise the questionnaire. As a result, some items were removed and instructions  
54  
55  
56  
57  
58  
59  
60

1  
2  
3 for study nurses were defined more precisely. After the pre-test, data was collected over  
4  
5 a period of about 12 months (from July 2015 to June 2016 in the special care ward and  
6  
7 from August 2015 to September 2016 in the regular care ward). To detect small to  
8  
9 medium effect sizes (Cohen's  $d \sim 0.1$  to  $0.2$ ), a power analysis was performed prior to  
10  
11 the data collection and yielded a sample size of at least 173 subjects per group. Patients  
12  
13 were included when they showed at least mild cognitive impairments or memory  
14  
15 problems. In the special care ward (intervention group) all patients were assessed  
16  
17 because a diagnosed dementia was a requirement for admission to that hospital. Hence,  
18  
19 the participation rate for the special care ward was about 94% and excluded only a few  
20  
21 patients that were not responsive. For the regular care ward (control group), patients  
22  
23 who already had a diagnosed dementia or cognitive impairments were included in the  
24  
25 study. A short dementia screening was carried out by the study nurse to assess the  
26  
27 severity of dementia of patients who had no clarified dementia diagnosis, and to identify  
28  
29 further patients who qualify for the study [24]. The total sample size for the present  
30  
31 analysis consists of  $N=526$  patients (special care ward:  $n=333$ ; regular care ward:  
32  
33  $n=193$ ). For both the intervention and control group, patients were excluded from the  
34  
35 study when they were completely confined to bed due to severe health-related  
36  
37 dependency. As both care wards had no particular selection criteria for patients such as  
38  
39 age, mobility, or the main diagnosis that lead to hospital admission, no further exclusion  
40  
41 criteria for the study were defined.

42  
43 Prior to the study, a study protocol was developed and submitted to the ethical  
44  
45 committee of the medical association of Hamburg. The ethical committee approved the  
46  
47 proposal and attested that the study conforms to ethical and legal requirements  
48  
49 (approval code PV5102). Study participants were not able to give their informed  
50  
51 consent due to their cognitive impairments. However, as data mostly derived from the  
52  
53  
54  
55  
56  
57  
58  
59  
60

1  
2  
3 hospitals' regular documentation and was completely anonymous, the ethics committee  
4  
5 waived the need of an informed consent.  
6  
7  
8  
9

## 10 **Patient and Public involvement**

11  
12 Patients and the public were not involved in the development of the research question  
13  
14 nor study design.  
15  
16

## 17 **Measures**

18  
19 *Outcome:* QoL in patients with dementia was assessed using the QUALIDEM [25,26].

20  
21 After observing patients for about one week (depending on the length of stay), the study  
22  
23 nurses rated their QoL. QUALIDEM comprises 37 items reflecting nine different  
24  
25 subdomains of QoL: "care relationship" (7 items, 0-21 points), "positive affect" (6 items,  
26  
27 0-18 points), "negative affect" (3 items, 0-9 points), "restless and tense behaviour" (3  
28  
29 items, 0-9 points), "positive self-image" (3 items, 0-9 points), "social relations" (6 items,  
30  
31 0-18 points), "social isolation" (3 items, 0-9 points), "feeling at home" (4 items, 0-12  
32  
33 points) and "have something to do" (2 items, 0-6 points). For patients with very severe  
34  
35 dementia (Minimental State Examination Test [27] [MMSE] < 7), only six of the nine  
36  
37 subscales apply, where the dimensions "positive self-image", "feeling at home" and "have  
38  
39 something to do" were omitted. The recommendation is to report descriptive results of  
40  
41 the QUALIDEM separately for each subscale. For regression analyses, a QoL index was  
42  
43 calculated by summing up and normalizing the QUALIDEM subscales (six subscales for  
44  
45 patients with very severe dementia, nine subscales for the remaining patients) to a  
46  
47 range from 0 to 100 points. A higher score indicates better QoL. Due to normalization of  
48  
49 the QUALIDEM total score for all severities of dementia, all patients' scores are  
50  
51 consistent and comparable [28].  
52  
53  
54  
55  
56  
57  
58  
59  
60

1  
2  
3 *Independent Variables:* Age, gender, main diagnosis for admission to hospital and length  
4 of stay were recorded. Details about the distribution of the main diagnoses among  
5 patients and by hospitals are shown in the Supplementary File 1. If a main diagnosis was  
6 mentioned no more than one time in both hospital wards, it was recoded into the  
7 category “other”. The final variable “main diagnosis” comprised 20 different diagnoses. A  
8 modified version of the Charlson’s Comorbidity Index [CCI], which included depression  
9 and hypertension as new items, was built based upon the assessment of comorbidities  
10 and chronic diseases [29,30]. If patients had no chronic illnesses, the CCI had a score of  
11 zero points. Else, higher scores indicated more serious comorbid disease. Shortly after  
12 admission to hospital, the study nurses measured functional limitations and cognitive  
13 status of patients. Functional limitations in daily living were assessed with the Barthel-  
14 Index [31]. This score ranges from 0 (completely dependent) to 100 points (no basic  
15 functional limitations) and was recoded according to the classification of the ICD-10 [32]  
16 (German adaption) into a score from 1 to 6 points. The Minimental State Examination  
17 Test [27] [MMSE] measures the cognitive impairments of patients, ranging from 0 (very  
18 strong cognitive impairments) to 30 (very mild or no cognitive impairments) points.  
19 This score was recoded into three categories, also based on ICD-10 classification: severe  
20 dementia (0-16), moderate dementia (17-23 points) and mild dementia (24-27 points).  
21 After about one week of hospital stay, the study nurses rated the patients’ agitation and  
22 challenging behaviour and recorded psychotropic drug use (chemical restraint) and  
23 physical restraints. Agitation and challenging behaviour of patients was assessed using  
24 the Pittsburgh Agitation Scale [PAS] [33] ranging from 0 to 16 points (higher scores  
25 indicate stronger agitation).  
26 Physical restraints were defined as the use of one the following measures: Side rails to  
27 keep a patient in bed, tying a patient to a bed, and use of “therapeutic” chairs that

1  
2  
3 prevent patients to stand up. The variable was dichotomised, indicating whether  
4  
5 patients (in the course of the hospital stay) were mechanically restrained by at least one  
6  
7 of these measures or not.  
8  
9

10 Psychotropic drug use was defined as on-demand-use (“as-needed”) of medication for  
11  
12 the nervous system by means of the Anatomical Therapeutical Chemical (ATC)  
13  
14 classification [34] and comprises antipsychotics, anxiolytics, hypnotics/sedatives and  
15  
16 antidepressants (N05A-C, N06A). Indicated use of psychotropic drugs was defined as  
17  
18 medications that were prescribed for regular, not on-demand-use and not only given to  
19  
20 patients in order to control their challenging behaviour. Such use of psychotropic drugs  
21  
22 was excluded from the analysis. The on-demand-use variable was dichotomised and  
23  
24 shows whether, during the complete hospital stay, chemical restraints were applied to  
25  
26 patients or not.  
27  
28  
29

30  
31 While these variables already cover many different aspects that have an effect on the  
32  
33 QoL, we decided to add a further predictor as proxy for the intervention to the model.  
34  
35 Therefore, we included a binary variable with two categories (“control” as reference and  
36  
37 “intervention”) representing the two hospitals, to estimate the impact of the special care  
38  
39 concept. This should reflect how much of the change in QoL is attributable to the special  
40  
41 care concept.  
42  
43  
44  
45  
46  
47

### 48 **Missing Data**

49  
50 In total, 11% of individual items across all scales were missing (at random), 6% of  
51  
52 individual items when looking at the QUALIDEM only. The missing data pattern was  
53  
54 analysed and missing data was imputed using the multivariate imputation by chained  
55  
56 equations method [35], using 11 imputation steps corresponding to the proportion of  
57  
58 missing data [36]. The method for imputing missing values depends on the variable’s  
59  
60

1  
2  
3 nature. For continuous variables, predictive mean matching was applied, while logistic  
4  
5 regressions were used for binary variables.  
6  
7  
8  
9

## 10 **Statistical Methods**

11  
12 Descriptive results for the total sample and each hospital are reported. Statistically  
13  
14 significant differences of  $p < 0.05$  between the two hospital wards were tested using t-  
15  
16 tests,  $\chi^2$ -tests or Mann-Whitney-U-tests, depending on the level of measurement and  
17  
18 distribution of variables. Differences between the hospitals in the QUALIDEM subscales  
19  
20 are presented as boxplots, showing the median value and upper and lower quartiles of  
21  
22 the value distribution.  
23  
24

25  
26 As multivariate analysis, a Bayesian linear mixed model was applied to analyse the  
27  
28 associations between the independent variables and the outcome. Computations were  
29  
30 based on Stan [37], a probabilistic programming language for specifying Bayesian  
31  
32 models, using Markov Chain Monte Carlo sampling (in particular, Hamiltonian Monte  
33  
34 Carlo) [38]. We assume that the patients' main diagnosis is associated with different  
35  
36 degrees of physical impairments, which affect the QoL. Therefore, the variable 'main  
37  
38 diagnosis' was used as level-2 unit (*random intercept*) in the multilevel model to control  
39  
40 for the variation in the outcome. We used informative priors for the predictors age,  
41  
42 female gender, severe dementia, psychotic drug use and physical restraints, based on  
43  
44 information from former research [18,39,40]. Weakly informative priors were used for  
45  
46 the remaining predictors. The prior and posterior distributions of the model are  
47  
48 summarised in the supplemental material (see Supplementary File 2).  
49  
50  
51  
52

53  
54 Continuous predictors were centred before entering the model. Age was divided by 10,  
55  
56 so a 1-unit change in the predictor of age reflects a change of 10 years in patients. The  
57  
58 median value of the posterior distribution is used as "Bayesian point estimate", which  
59  
60



1  
2  
3 minimises the difference of estimates from true values over posterior samples, but there  
4 are many other plausible values (the “posterior distribution”) to describe the association  
5  
6 between predictors and outcome. Hence, 50% and 89% highest density intervals [41]  
7  
8 [HDI] are shown to indicate the range of most credible values and to reflect the (un-  
9  
10 )certainty of the estimates. The intraclass correlation coefficient [42] was calculated to  
11  
12 see how much of the proportion of the variance in the outcome can be explained by the  
13  
14 grouping structure (‘main diagnosis’). We developed post-hoc additional regression  
15  
16 models with interaction terms for need predictors (Barthel-Index, physical and chemical  
17  
18 restraints, PAS-Score) to check if the associations between the complexity of patients’  
19  
20 needs and QoL differ between hospitals. We found no significant interaction terms and  
21  
22 decided to present the most parsimonious model here and show further results in the  
23  
24 appendix (see Supplementary File 3).  
25  
26  
27  
28  
29

30  
31 All analyses were conducted with the R statistical package [43], including the packages  
32  
33 *mice* [35], *ggplot* [44], *brms* [45] and *sjPlot* [46]. The source code is available in the  
34  
35 supplemental material (see Supplementary File 4). Data is available online [47].  
36  
37  
38  
39

## 40 41 **Results**

### 42 43 **Sample Characteristics**

44  
45 Table 1 gives an overview of the sample characteristics. The proportion of female to  
46  
47 male patients is similar in both groups. The mean age is 4 years higher in the control  
48  
49 group. There are also significant group differences in the Barthel-Index indicating higher  
50  
51 functional impairment in the control group, while the dementia severity was the same in  
52  
53 both hospitals. Comorbid conditions are slightly higher in the control group. Patients  
54  
55 stayed 9.4 days in hospital on average and nearly one day longer in the intervention  
56  
57 group as compared to the control group. Large differences between the two hospitals  
58  
59  
60

can be seen in the use of medical and physical restraints with significantly less use in the intervention group. Agitation- and QoL-scores also show strong group differences to the disadvantage of the patients in the control group.

In most cases, the distribution of main diagnoses of patients were comparable between the two hospital wards (see Supplemental File 1). Most frequent were pneumonia (13.5% in the intervention group and 11.9% in the control group), a worsening medical condition of patients (8.7% and 7.2%) or exsiccosis (4.8% and 6.7%). Noticeable differences between the two wards were found in urinary tract infections (UTI) (9.9% in the intervention group and 3.1% in the control group) or dyspnoea (1.2% and 7.8%).

Table 1: Sample Characteristics

| Characteristic                            | Control Group (Regular Care Ward, n=193) | Intervention Group (Special Care Ward, n=333) | Total (N=526) | p-value of difference |
|-------------------------------------------|------------------------------------------|-----------------------------------------------|---------------|-----------------------|
| Female, %                                 | 59.1                                     | 61.6                                          | 60.6          | .637                  |
| Mean Age (SD)                             | 83.1 (7.2)                               | 79.0 (11.9)                                   | 80.5 (10.6)   | <.001                 |
| Mean Barthel-Index (SD)                   | 29.9 (27.9)                              | 40.7 (30.4)                                   | 36.7 (29.9)   | <.001                 |
| Mild Dementia, %                          | 7.8                                      | 9.6                                           | 8.9           | .580                  |
| Moderate Dementia, %                      | 30.0                                     | 26.7                                          | 27.9          | .473                  |
| Severe Dementia, %                        | 62.2                                     | 63.7                                          | 63.2          | .805                  |
| Mean Length of Stay, in Days (SD)         | 8.9 (7.5)                                | 9.7 (5.5)                                     | 9.4 (6.3)     | .002                  |
| Physical Restraints (yes), %              | 54.4                                     | 28.2                                          | 37.8          | <.001                 |
| Psychotropic Drug Use (yes, as-needed), % | 25.9                                     | 14.1                                          | 18.4          | .001                  |
| Mean-Score Pittsburg Agitation Scale (SD) | 3.9 (3.1)                                | 3.0 (3.2)                                     | 3.3 (3.2)     | <.001                 |
| Mean Charlson' Comorbidity Index (SD)     | 3.2 (3.0)                                | 2.5 (2.0)                                     | 2.8 (1.6)     | <.001                 |
| Mean QUALIDEM Total Score (SD)            | 40.7 (14.5)                              | 51.2 (17.2)                                   | 47.3 (17.0)   | <.001                 |

Barthel-Index: 0-100 (higher = better functioning); Dementia (MMSE score): mild: 24-27; moderate: 17-23; severe: <= 16; Pittsburg Agitation Scale: 0-16 (higher = stronger agitation and anxiety); Charlson' Comorbidity Index: 0-9 (higher = more comorbidities); QUALIDEM: 0-100 (higher = better QoL)

## Quality of life

1  
2  
3 Looking at the QoL for patients with severe to mild cognitive impairments (these are the  
4 ones, in which all subdomains of the QUALIDEM could be applied), there is a consistent  
5 pattern across all QUALIDEM-domains: Patients in the control group have a lower QoL  
6 compared to the intervention group. Except for the last subdomain ('having something  
7 to do'), all differences are statistically significant (Figure 1).  
8  
9  
10  
11  
12  
13  
14  
15  
16

17 The same consistent pattern can be found for patients with very severe dementia  
18 symptoms (MMSE score < 7). Here, only the second of the six applied subdomains  
19 ('positive affect') does not differ significantly between intervention and control (Figure  
20 2).  
21  
22  
23  
24  
25  
26  
27  
28

### 29 **Predictors of quality of life**

30  
31 Figure 3 shows the results from the Bayesian mixed model. Three predictors are clearly  
32 negatively associated with QoL: physical restraint, psychotropic drug use and agitation  
33 (PAS-score). Physical restraint is associated with a 4.9-point decrease in QoL. With 50%  
34 probability, the QoL decreases by 4.1 to 5.8 points and with a chance of 89% by -7 to -2.8  
35 points respectively. The application of psychotropic drugs as-needed shows similar  
36 results, with a posterior median of -4.4. The third clearly negative associated predictor is  
37 agitation, which shows a decrease in QoL of about 2.9 points for each additional point in  
38 the PAS-score.  
39  
40  
41  
42  
43  
44  
45  
46  
47  
48

49 Dementia and gender are not clearly associated with QoL. Neither are the length of  
50 hospital stay and the CCI.  
51  
52  
53

54 The age of the patient correlates slightly positive with QoL, where an increase of 10  
55 years means an increase of about 1.2 points in the QoL. The posterior median of the  
56 Barthel-Index is 2.0, so for a one-category change in functional impairments the QoL  
57  
58  
59  
60

1  
2  
3 changes by two points. This means that patients with severe functional impairments  
4  
5 differ by about 10 points in QoL compared to patients with no functional impairments.  
6  
7 Controlling for all other predictors, the intervention (special care ward) shows the  
8  
9 strongest association with our outcome of interest, the patients' QoL. The posterior  
10  
11 median is 5.7, and with an 89% probability, the credible values describing the effect of  
12  
13 the intervention on QoL are within the range from 3.8 to 7.6.  
14  
15

16  
17 The intraclass correlation coefficient of the model is rather low (0.01). This means, the  
18  
19 'main diagnosis' does not explain much of the variance in the patients' QoL and there is  
20  
21 almost no regularization ("shrinkage") of estimated model parameters and no larger  
22  
23 differences between hospitals according to the patients' needs, as indicated by their  
24  
25 main diagnosis.  
26  
27  
28  
29  
30

## 31 Discussion

32  
33 The study reported in this paper sought to understand those factors that influence the  
34  
35 QoL in patients with dementia and whether a special care concept for these patients  
36  
37 performs better in this regard as opposed to regular care wards.  
38  
39

40  
41 One of our main findings is that QoL differs significantly between the control and  
42  
43 intervention group. We found substantial differences between the two hospitals in the  
44  
45 patients' total QoL score in favour of the special care ward. Beyond the statistical  
46  
47 significance, this finding also has a clinical impact. Studies suggest a change in 3 points  
48  
49 for the Quality of Life – Alzheimer's Disease Scale [48], which has a range of 40 points, to  
50  
51 be clinically relevant [49,50]. Transferred to the range of the QUALIDEM scale, a  
52  
53 difference of about 7.5 points would be considered as an important improvement in  
54  
55 QoL. Another indicator to evaluate the clinical relevance of a change in QoL is an  
56  
57 increase of the score of half a standard deviation [51], which would be about 8.5 points  
58  
59  
60

1  
2  
3 for our data. Taking these reference points as a basis, we found evidence for the clinical  
4 relevant improvement in QoL of patients in a special care ward.  
5  
6

7  
8 A second key finding is the identification of those factors that are clearly associated with  
9  
10 QoL. The use of physical and chemical restraints, both happening more frequently in the  
11 control group, are associated with lower outcomes in QoL. This finding is in line with  
12  
13 other studies that suggest a negative association between physical and chemical  
14  
15 restraints and QoL [18,40] and explains why the regular care ward performs less good in  
16  
17 this regard than the special care ward. Agitation was also negatively associated with  
18  
19 QoL. This is understandable as agitation is an expression of anxiety and indisposition of  
20  
21 people with dementia and typically occurs after admission to hospital. Furthermore,  
22  
23 agitation is often a reason for psychotropic drug use or physical restraint and, thus, also  
24  
25 negatively affects QoL [52,53].  
26  
27  
28  
29

30  
31 Independent from these factors, the special care ward itself shows the strongest impact  
32  
33 on QoL, indicating that patients with dementia explicitly benefit from specialised care  
34  
35 concepts. Other studies also report these benefits, both in a nursing home or hospital  
36  
37 setting [54,55]. Since we controlled for patient characteristics like main diagnosis, age,  
38  
39 functional limitations, chronic comorbidities, agitation, length of stay etc. in our model,  
40  
41 we do not assume that the positive effect of the special care ward is completely a result  
42  
43 of a biased sample between intervention and control group. Although the two compared  
44  
45 hospitals differ in their structures and size, patients' characteristics are largely  
46  
47 comparable between the samples in the control and intervention group. For instance,  
48  
49 there is no substantial difference between the two hospitals regarding the relationship  
50  
51 between functional impairments and physical restraints. Moreover, to see if the  
52  
53 complexity of patients' need affects our findings, we calculated regression models with  
54  
55  
56  
57  
58  
59  
60

1  
2  
3 interaction terms between need factors moderated by hospitals (see Supplementary File  
4  
5 3).

6  
7  
8 The association between complexity of needs and QoL is not significantly different  
9  
10 between the intervention and control group. Based on our results we suggest that the  
11  
12 special care concept mainly explains the differences in the QoL. Although it is certainly  
13  
14 difficult to determine the exact effect of the special care concept on the patients' QoL,  
15  
16 our findings seem plausible in the light of the key elements of this intervention. A higher  
17  
18 ratio of care staff as to patients, smaller facilities or systematically trained employees  
19  
20 can be considered essential for health care provision to patients with dementia and are  
21  
22 much better conditions for less physical or chemical restraints, independent of the  
23  
24 functional limitations of patients. The special care ward provides a more dementia-  
25  
26 friendly interior design, including orientation and navigation aids and the use of light  
27  
28 and colours, which are considered as important components to reduce agitation for  
29  
30 patients with dementia [56].

31  
32  
33 These findings and conclusions are in line with other studies on hospital care that  
34  
35 suggest that an increased staff ratio or the implementation of multiple components,  
36  
37 which particularly address the needs of patients with dementia, lead to reduced use of  
38  
39 physical restraints and psychotropic drug use and improve the quality of care [57,58].  
40  
41 Furthermore, dementia-specific educational programmes, as implemented in the special  
42  
43 care ward, have positive effects on nurses regarding their interaction with patients with  
44  
45 dementia. Trained nurses can improve their coping skills in handling challenging  
46  
47 behaviour of these patients, and better attend to the patients' unmet physical and  
48  
49 psychological needs [59].

50  
51  
52 Studies suggest that the use of both physical and chemical restraints is reduced for  
53  
54 nurses who completed a dementia-specific training as opposed to nurses who did not  
55  
56  
57  
58  
59  
60

1  
2  
3 complete such an educational programme. Trained nurses had better skills in providing  
4 patient-centred care and thus improving the QoL for patients with dementia [59–61].  
5

6  
7 The special care ward benefits from a higher staff ratio, i.e. nurses have to care for fewer  
8 patients with dementia compared to the control group. While this is an intentional  
9 element of the concept, the downside is higher personnel costs. Only few studies  
10 investigated the follow-up costs for patients with dementia in home care settings after  
11 hospitalization. Costa et al. predicted additional monthly costs in home care of about  
12 445 Euros due to increased agitation of patients with dementia [62]. Thus, if patients  
13 with dementia benefit from special care concepts and perceive better outcomes in  
14 quality of life and care, the increased costs for more care personnel may be compensated  
15 by reducing follow-up costs for the ambulatory care. However, further research is  
16 needed to give more exact projections of the increased costs and potential of saving  
17 money.  
18  
19  
20  
21  
22  
23  
24  
25  
26  
27  
28  
29  
30  
31  
32

33 Another finding is that the severity of cognitive impairments, measured with the MMSE,  
34 is a rather improper indicator to represent the underlying problems of and with the  
35 dementia disease, as these factors were not consistently associated with QoL. Direct  
36 measures of the problems associated with dementia, as agitation or challenging  
37 behaviour, should be considered as well when it comes to investigate the QoL of patients  
38 with dementia.  
39  
40  
41  
42  
43  
44  
45  
46

47 Our study has several limitations. One concerns the structural differences between the  
48 two hospitals. The hospital with the special care ward is much smaller than the hospital  
49 that hosted the control group. A second control group or an intervention group in a  
50 hospital of a similar size as the hospital with the regular care ward may have permitted  
51 a more distinct comparison. We tried to keep the impact of the structural differences as  
52  
53  
54  
55  
56  
57  
58  
59  
60

1  
2  
3 minimal as possible, for instance by accounting for many different patient  
4  
5 characteristics including functional status, comorbidities and behavioural problems.  
6  
7 Furthermore, the main diagnoses of patients were also considered in the analysis. We  
8  
9 assume that we could at least partly adjust our analysis for a bias due to patient  
10  
11 selection mechanisms. To validate our assumptions, we investigated to which extent the  
12  
13 association between patient characteristics and QoL is affected by differences between  
14  
15 the control and intervention group (details shown in Supplementary File 3). Results  
16  
17 suggest that our data provides no strong evidence for noticeably differences between  
18  
19 the intervention and control group regarding the association between complexity of  
20  
21 patients' needs and QoL. However, although we adjusted our analysis for many patient  
22  
23 characteristics, we cannot eliminate a potential bias due to different hospital structures.  
24  
25 In particular, the higher mean age and stronger functional limitations in the control  
26  
27 group may indicate a selection bias in our sample. We suggest that further studies  
28  
29 should take a second control group or a more comparable intervention group into  
30  
31 account to gain more insight into potential biases due to structural differences of the  
32  
33 control and intervention group.  
34  
35 Another structural difference between the intervention and control group that certainly  
36  
37 affects the results are the different staff-patient-ratios. In the special care ward, nurses  
38  
39 have to care for fewer patients than in the regular care ward. Although we assume that  
40  
41 this aspect probably has the highest impact on the outcomes in QoL, this is not a  
42  
43 "selection bias" per se rather than a core component of the intervention. A higher staff-  
44  
45 patient-ratio, dementia-specific training programmes, or a specific architectural  
46  
47 design are key elements of the special care concept, which, in their entirety, are reflected  
48  
49 in the resulting differences between hospitals.  
50  
51  
52  
53  
54  
55  
56  
57  
58  
59  
60



1  
2  
3 A further limitation is possibly the first and thus rather exploratory use of the  
4  
5 QUALIDEM assessment in a hospital setting. Although studies show reliable results of  
6  
7 the QUALIDEM in nursing homes even for a short observation period of about one week  
8  
9 [63], there are no studies that evaluate the reliability and validity for use in hospitals.  
10  
11 We have done checks of internal consistencies, which showed that most subdomains of  
12  
13 the QUALIDEM perform well with our data and are comparable to results from other  
14  
15 validation studies [64]. This indicates that the use of the QUALIDEM is feasible for  
16  
17 hospital research. However, due to financial and logistic limitations, it was not possible  
18  
19 to monitor the complete data collection and accurate completion of questionnaires.  
20  
21 Hence, we cannot give evidence on the interrater reliability apart from the intense  
22  
23 training of the study nurses.  
24  
25

26  
27  
28 Another debatable issue regarding the QUALIDEM concerns the computation concept of  
29  
30 the total score for patients with very severe dementia. We followed the QUALIDEM  
31  
32 authors' instruction to use only six of the nine subscales to calculate the total score for  
33  
34 this group [65]. Technically, this is similar to mean value imputation for the missing  
35  
36 scores of the three omitted subscales. This, however, may result in biased and/or  
37  
38 underestimated measurement error variance for this group. Therefore, we also  
39  
40 calculated a regression model with a QUALIDEM total score based on imputation for  
41  
42 missing values for all nine subscales for patients with very severe dementia (see  
43  
44 Supplementary File 5). In the results section, we have provided the analyses as  
45  
46 suggested by the QUALIDEM authors for comparability reasons. In order to meet  
47  
48 different views on the computation concept, we also provide the results of the  
49  
50 alternative analysis in the Supplementary File 5. These are very similar to the first  
51  
52 analysis and do not differ significantly.  
53  
54  
55  
56  
57  
58  
59  
60

1  
2  
3 Finally, due to the nature of the study design, it was not possible that study nurses in the  
4  
5 intervention and control group were blinded. This might affect the results insofar as  
6  
7 study nurses may have generated more generous responses for the assessment scales  
8  
9 [66].  
10  
11  
12  
13  
14

## 15 **Conclusions**

16  
17 On the whole, we think that a special care ward will improve the quality of care and is  
18  
19 effective regarding the positive impact on the QoL of patients with dementia. Our study  
20  
21 showed that after controlling for different predictors, the intervention still has a  
22  
23 perceptible effect concerning clinical important differences in our outcome of interest,  
24  
25 the patients' quality of life. However, such improvements can only be achieved by  
26  
27 implementing a concept with multiple components that address the explicit needs of  
28  
29 patients with dementia. The implementation of a special care concept usually increases  
30  
31 the costs for hospitals because it requires a higher staff-patient-ratio, regular training of  
32  
33 employees or more therapeutic offers. On the other hand, costs that accumulate in  
34  
35 informal care after hospital stay as a result of poorer quality of care in hospitals can be  
36  
37 much higher than additional personnel costs and could probably be reduced [62,67].  
38  
39 Health policies should consider the benefits of special care concepts and develop  
40  
41 incentives for hospitals to improve the QoL and quality of care for patients with  
42  
43 dementia.  
44  
45  
46  
47  
48  
49  
50  
51  
52  
53  
54  
55  
56  
57  
58  
59  
60

## Acknowledgement

The authors are grateful to the clinical staff of both hospitals who supported this study by helping with the data collection. Furthermore, we are thankful to the Authority of Health and Consumer Protection and the Homann-foundation for funding this study.

## Author Contributions

DL was involved in conception and design of the study, analysis and interpretation of data and drafting the article. GP was involved in conception and design of the study and interpretation of data. JK was involved in interpretation of data and drafting the article. CK was involved in conception and design of the study, interpretation of data and drafting the article.

## Competing interests

The authors have declared that no competing interests exist.

## Funding

The present study was funded by the Behörde für Gesundheit und Verbraucherschutz (Authority of Health and Consumer Protection) in Hamburg and the Homann-foundation (grant number Z/65454/2014/F500-02.10/10,002). No one of the funders was involved in the data analysis process and did not influence or hold back results of the study.

## Ethics approval and consent to participate

Prior to the study, a study protocol was developed and submitted to the ethical committee of the medical association of Hamburg ("Ethik-Kommission der Ärztekammer Hamburg"). The IRB of the ethical committee approved the proposal and attested that the study conforms to ethical and legal requirements (approval code PV5102). Study participants were not able to give their informed consent due to their cognitive impairments. However, as data mostly derived from the hospitals' regular documentation and was completely anonymous, the IRB of the ethics committee waived the need of an informed consent.

### Availability of data and material

All data generated or analysed during this study are licensed under CC BY-NC 4.0 and available in the Zenodo repository (DOI: 10.5281/zenodo.3351450) at <https://doi.org/10.5281/zenodo.3351450>.

For peer review only

## References

- 1 Recine U, Scotti E, Bruzzese V, *et al.* The change of hospital internal medicine: a study on patients admitted in internal medicine wards of 8 hospitals of the Lazio area, Italy. *Ital J Med* 2015;**9**:252. doi:10.4081/itjm.2015.523
- 2 Raveh D, Gratch L, Yinnon AM, *et al.* Demographic and clinical characteristics of patients admitted to medical departments. *J Eval Clin Pract* 2005;**11**:33–44. doi:10.1111/j.1365-2753.2004.00492.x
- 3 Sonnenblick M, Raveh D, Gratch L, *et al.* Clinical and demographic characteristics of elderly patients hospitalised in an internal medicine department in Israel: Characteristics of elderly patients in medical wards. *Int J Clin Pract* 2007;**61**:247–54. doi:10.1111/j.1742-1241.2006.00925.x
- 4 Mukadam N, Sampson EL. A systematic review of the prevalence, associations and outcomes of dementia in older general hospital inpatients. *Int Psychogeriatr* 2011;**23**:344–55. doi:10.1017/S1041610210001717
- 5 Zekry D, Herrmann FR, Grandjean R, *et al.* Does dementia predict adverse hospitalization outcomes? A prospective study in aged inpatients. *Int J Geriatr Psychiatry* 2009;**24**:283–91. doi:10.1002/gps.2104
- 6 Lyketsos CG, Sheppard JM, Rabins PV. Dementia in elderly persons in a general hospital. *Am J Psychiatry* 2000;**157**:704–7. doi:10.1176/appi.ajp.157.5.704
- 7 Sampson EL, Blanchard MR, Jones L, *et al.* Dementia in the acute hospital: prospective cohort study of prevalence and mortality. *Br J Psychiatry J Ment Sci* 2009;**195**:61–6. doi:10.1192/bjp.bp.108.055335
- 8 Pinkert C, Holle B. Menschen mit Demenz im Akutkrankenhaus: Literaturübersicht zu Prävalenz und Einweisungsgründen. *Z Für Gerontol Geriatr* 2012;**45**:728–34. doi:10.1007/s00391-012-0319-1
- 9 Dutzi I, Schwenk M, Micol W, *et al.* Patienten mit Begleitdiagnose Demenz. *Z Für Gerontol Geriatr* 2013;**46**:208–13. doi:10.1007/s00391-013-0483-y
- 10 Timmons S, O’Shea E, O’Neill D, *et al.* Acute hospital dementia care: results from a national audit. *BMC Geriatr* 2016;**16**:113. doi:10.1186/s12877-016-0293-3
- 11 Pi H-Y, Gao Y, Wang J, *et al.* Risk Factors for In-Hospital Complications of Fall-Related Fractures among Older Chinese: A Retrospective Study. *BioMed Res Int* 2016;**2016**:1–11. doi:10.1155/2016/8612143
- 12 Hu C-J, Liao C-C, Chang C-C, *et al.* Postoperative Adverse Outcomes in Surgical Patients with Dementia: A Retrospective Cohort Study. *World J Surg* 2012;**36**:2051–8. doi:10.1007/s00268-012-1609-x
- 13 Motzek T, Junge M, Marquardt G. Einfluss der Demenz auf Verweildauer und Erlöse im Akutkrankenhaus. *Z Für Gerontol Geriatr* 2017;**50**:59–66. doi:10.1007/s00391-016-1040-2

- 14 Gross AL, Jones RN, Habtemariam DA, *et al.* Delirium and Long-term Cognitive Trajectory Among Persons With Dementia. *Arch Intern Med* 2012;**172**:1324. doi:10.1001/archinternmed.2012.3203
- 15 Nakanishi M, Okumura Y, Ogawa A. Physical restraint to patients with dementia in acute physical care settings: effect of the financial incentive to acute care hospitals. *Int Psychogeriatr* 2017;:1–10. doi:10.1017/S104161021700240X
- 16 Krüger C, Mayer H, Haastert B, *et al.* Use of physical restraints in acute hospitals in Germany: a multi-centre cross-sectional study. *Int J Nurs Stud* 2013;**50**:1599–606. doi:10.1016/j.ijnurstu.2013.05.005
- 17 Heinze C, Dassen T, Grittner U. Use of physical restraints in nursing homes and hospitals and related factors: a cross-sectional study: Physical restraints in nursing homes and hospitals. *J Clin Nurs* 2012;**21**:1033–40. doi:10.1111/j.1365-2702.2011.03931.x
- 18 Beerens HC, Sutcliffe C, Renom-Guiteras A, *et al.* Quality of Life and Quality of Care for People With Dementia Receiving Long Term Institutional Care or Professional Home Care: The European RightTimePlaceCare Study. *J Am Med Dir Assoc* 2014;**15**:54–61. doi:10.1016/j.jamda.2013.09.010
- 19 Beerens HC, Zwakhalen SMG, Verbeek H, *et al.* Factors associated with quality of life of people with dementia in long-term care facilities: A systematic review. *Int J Nurs Stud* 2013;**50**:1259–70. doi:10.1016/j.ijnurstu.2013.02.005
- 20 Kricheldorf C, Hofmann W. Demenz im Akutkrankenhaus. *Z Für Gerontol Geriatr* 2013;**46**:196–7. doi:10.1007/s00391-013-0484-x
- 21 Treurniet HF, Essink-Bot M-L, Mackenbach JP, *et al.* Health-related quality of life: an indicator of quality of care? *Qual Life Res* 1997;**6**:363–9. doi:10.1023/A:1018435427116
- 22 Valderas JM, Alonso J. Patient reported outcome measures: a model-based classification system for research and clinical practice. *Qual Life Res* 2008;**17**:1125–35. doi:10.1007/s11136-008-9396-4
- 23 Tondi L, Ribani L, Bottazzi M, *et al.* Validation therapy (VT) in nursing home: A case-control study. *Arch Gerontol Geriatr* 2007;**44**:407–11. doi:10.1016/j.archger.2007.01.057
- 24 Kaiser AK, Hitzl W, Iglseider B. Three-question dementia screening: Development of the Salzburg Dementia Test Prediction (SDTP). *Z Für Gerontol Geriatr* 2014;**47**:577–82. doi:10.1007/s00391-013-0568-7
- 25 Ettema TP, Dröes R-M, de Lange J, *et al.* QUALIDEM: development and evaluation of a dementia specific quality of life instrument. Scalability, reliability and internal structure. *Int J Geriatr Psychiatry* 2007;**22**:549–56. doi:10.1002/gps.1713
- 26 Dichter MM, Ettema TP, Schwab CGG, *et al.* Benutzerhandbuch für die deutschsprachige QUALIDEM Version 2.0. Witten: 2016.
- 27 Folstein MF, Folstein SE, McHugh PR. “Mini-mental state”. A practical method for grading the cognitive state of patients for the clinician. *J Psychiatr Res* 1975;**12**:189–98.

- 1  
2  
3 28 Dichter MN, Meyer G. Quality of Life of People with Dementia in Nursing Homes. In:  
4 Schüssler S, Lohrmann C, eds. *Dementia in Nursing Homes*. Cham: : Springer 2017. 139–  
5 57. doi:10.1007/978-3-319-49832-4\_11  
6
- 7 29 Charlson ME, Pompei P, Ales KL, *et al*. A new method of classifying prognostic  
8 comorbidity in longitudinal studies: development and validation. *J Chronic Dis*  
9 1987;**40**:373–83.  
10
- 11 30 Charlson ME, Charlson RE, Peterson JC, *et al*. The Charlson comorbidity index is  
12 adapted to predict costs of chronic disease in primary care patients. *J Clin Epidemiol*  
13 2008;**61**:1234–40. doi:10.1016/j.jclinepi.2008.01.006  
14
- 15 31 Mahoney FI, Barthel DW. Functional Evaluation: The Barthel Index. *Md State Med J*  
16 1965;**14**:61–5.  
17
- 18 32 Deutsches Institut f. medizinische Dokumentation u. Information (DIMDI). *ICD-10-GM*  
19 *2017 Systematisches Verzeichnis*. Lich, Hess: : pictura Werbung 2016.  
20
- 21 33 Rosen J, Burgio L, Kollar M, *et al*. The Pittsburg Agitation Scale: A user-friendly  
22 instrument for rating agitation in dementia patients. *Am J Geriatr Psychiatry Off J Am*  
23 *Assoc Geriatr Psychiatry* 1994;**2**:52–9.  
24
- 25 34 WHO Collaborating Centre for Drug Statistics Methodology, editor. *Guidelines for ATC*  
26 *classification and DDD assignment 2013*. Oslo: 2012.  
27
- 28 35 Buuren S van, Groothuis-Oudshoorn K. mice: Multivariate Imputation by Chained  
29 Equations in R. *J Stat Softw* 2011;**45**. doi:10.18637/jss.v045.i03  
30
- 31 36 White IR, Royston P, Wood AM. Multiple imputation using chained equations: Issues and  
32 guidance for practice. *Stat Med* 2011;**30**:377–99. doi:10.1002/sim.4067  
33
- 34 37 Carpenter B, Gelman A, Hoffman MD, *et al*. Stan: A Probabilistic Programming  
35 Language. *J Stat Softw* 2017;**76**. doi:10.18637/jss.v076.i01  
36
- 37 38 Gelman A, Carlin JB, Stern HS, *et al*. *Bayesian data analysis*. Third edition. Boca Raton:  
38 : CRC Press 2014.  
39
- 40 39 Barca ML, Engedal K, Laks J, *et al*. Quality of Life among Elderly Patients with  
41 Dementia in Institutions. *Dement Geriatr Cogn Disord* 2011;**31**:435–42.  
42 doi:10.1159/000328969  
43
- 44 40 Beer C, Flicker L, Horner B, *et al*. Factors Associated with Self and Informant Ratings of  
45 the Quality of Life of People with Dementia Living in Care Facilities: A Cross Sectional  
46 Study. *PLoS ONE* 2010;**5**:e15621. doi:10.1371/journal.pone.0015621  
47
- 48 41 McElreath R. *Statistical rethinking: a Bayesian course with examples in R and Stan*. Boca  
49 Raton London New York: : CRC Press, Taylor & Francis Group 2016.  
50
- 51 42 Hox JJ. *Multilevel analysis: techniques and applications*. 2nd ed. New York: : Routledge  
52 2010.  
53
- 54 43 R Core Team. *R: A Language and Environment for Statistical Computing*. Vienna,  
55 Austria: : R Foundation for Statistical Computing 2019. <https://www.R-project.org/>  
56  
57  
58  
59  
60

- 1  
2  
3 44 Wickham H. *ggplot2: Elegant Graphics for Data Analysis*. 2nd ed. New York: : Springer  
4 2016.  
5  
6  
7 45 Bürkner P-C. brms: An R Package for Bayesian Multilevel Models Using Stan. *J Stat*  
8 *Softw* 2017;**80**. doi:10.18637/jss.v080.i01  
9  
10 46 Lüdtke D. *sjPlot: Data Visualization for Statistics in Social Science*. 2018.  
11 doi:10.5281/zenodo.1308157  
12  
13 47 Lüdtke D. Dataset: Quality Of Life Of Patients With Dementia In Acute Hospitals-  
14 Version 1.0. 2018. doi:10.5281/zenodo.1479677  
15  
16 48 Thorgrimsen L, Selwood A, Spector A, *et al*. Whose quality of life is it anyway? The  
17 validity and reliability of the Quality of Life-Alzheimer's Disease (QoL-AD) scale.  
18 *Alzheimer Dis Assoc Disord* 2003;**17**:201–8.  
19  
20 49 Selwood A, Thorgrimsen L, Orrell M. Quality of life in dementia--a one-year follow-up  
21 study. *Int J Geriatr Psychiatry* 2005;**20**:232–7. doi:10.1002/gps.1271  
22  
23 50 Hoe J, Hancock G, Livingston G, *et al*. Changes in the quality of life of people with  
24 dementia living in care homes. *Alzheimer Dis Assoc Disord* 2009;**23**:285–90.  
25 doi:10.1097/WAD.0b013e318194fc1e  
26  
27 51 Norman GR, Sloan JA, Wyrwich KW. Interpretation of Changes in Health-related Quality  
28 of Life: The Remarkable Universality of Half a Standard Deviation. *Med Care*  
29 2003;**41**:582–92. doi:10.1097/01.MLR.0000062554.74615.4C  
30  
31 52 Lam K, Kwan JSK, Wai Kwan C, *et al*. Factors Associated With the Trend of Physical  
32 and Chemical Restraint Use Among Long-Term Care Facility Residents in Hong Kong:  
33 Data From an 11-Year Observational Study. *J Am Med Dir Assoc* 2017;**18**:1043–8.  
34 doi:10.1016/j.jamda.2017.06.018  
35  
36 53 Ó Flatharta T, Haugh J, Robinson SM, *et al*. Prevalence and predictors of bedrail use in  
37 an acute hospital. *Age Ageing* 2014;**43**:801–5. doi:10.1093/ageing/afu081  
38  
39 54 Kok JS, Berg IJ, Scherder EJA. Special Care Units and Traditional Care in Dementia:  
40 Relationship with Behavior, Cognition, Functional Status and Quality of Life - A Review.  
41 *Dement Geriatr Cogn Disord Extra* 2013;**3**:360–75. doi:10.1159/000353441  
42  
43 55 von Renteln-Kruse W, Neumann L, Klugmann B, *et al*. Geriatric Patients With Cognitive  
44 Impairment. *Dtsch Arztebl Int* 2015;**112**:103–12. doi:10.3238/arztebl.2015.0103  
45  
46 56 Büter K, Motzek T, Dietz B, *et al*. Demenzsensible Krankenhausstationen:  
47 Expertenempfehlungen zu Planung und Gestaltung. *Z Für Gerontol Geriatr* 2017;**50**:67–  
48 72. doi:10.1007/s00391-016-1079-0  
49  
50 57 Blair A, Anderson K, Bateman C. The “Golden Angels”: effects of trained volunteers on  
51 specialling and readmission rates for people with dementia and delirium in rural hospitals.  
52 *Int Psychogeriatr* 2018;:1–10. doi:10.1017/S1041610218000911  
53  
54 58 Sinvani L, Warner-Cohen J, Strunk A, *et al*. A Multicomponent Model to Improve  
55 Hospital Care of Older Adults with Cognitive Impairment: A Propensity Score-Matched  
56  
57  
58  
59  
60



- 1  
2  
3 Analysis. *J Am Geriatr Soc* Published Online First: 11 August 2018.  
4 doi:10.1111/jgs.15452  
5
- 6  
7 59 Schindel Martin L, Gillies L, Coker E, *et al.* An Education Intervention to Enhance Staff  
8 Self-Efficacy to Provide Dementia Care in an Acute Care Hospital in Canada: A  
9 Nonrandomized Controlled Study. *Am J Alzheimers Dis Dementiasr* 2016;**31**:664–77.  
10 doi:10.1177/1533317516668574  
11
- 12  
13 60 Matsuda Y, Hashimoto R, Takemoto S, *et al.* Educational benefits for nurses and nursing  
14 students of the dementia supporter training program in Japan. *PLOS ONE*  
15 2018;**13**:e0200586. doi:10.1371/journal.pone.0200586  
16
- 17  
18 61 Galvin JE, Kuntemeier B, Al-Hammadi N, *et al.* “Dementia-friendly Hospitals: Care not  
19 Crisis.” *Alzheimer Dis Assoc Disord* 2010;**24**:372–9.  
20 doi:10.1097/WAD.0b013e3181e9f829  
21
- 22  
23 62 Costa N, Wübker A, De Mauléon A, *et al.* Costs of Care of Agitation Associated With  
24 Dementia in 8 European Countries: Results From the RightTimePlaceCare Study. *J Am*  
25 *Med Dir Assoc* 2018;**19**:95.e1-95.e10. doi:10.1016/j.jamda.2017.10.013  
26
- 27  
28 63 Dichter MN, Schwab CGG, Meyer G, *et al.* Item distribution, internal consistency and  
29 inter-rater reliability of the German version of the QUALIDEM for people with mild to  
30 severe and very severe dementia. *BMC Geriatr* 2016;**16**. doi:10.1186/s12877-016-0296-0  
31
- 32  
33 64 Dichter M, Dortmann O, Halek M, *et al.* Scalability and internal consistency of the  
34 German version of the dementia-specific quality of life instrument QUALIDEM in  
35 nursing homes – a secondary data analysis. *Health Qual Life Outcomes* 2013;**11**:91.  
36 doi:10.1186/1477-7525-11-91  
37
- 38  
39 65 Dichter MN, Quasdorf T, Schwab CGG, *et al.* Dementia care mapping: effects on  
40 residents’ quality of life and challenging behavior in German nursing homes. A quasi-  
41 experimental trial. *Int Psychogeriatr* 2015;**27**:1875–92. doi:10.1017/S1041610215000927  
42
- 43  
44 66 Schulz KF, Grimes DA. Blinding in randomised trials: hiding who got what. *The Lancet*  
45 2002;**359**:696–700. doi:10.1016/S0140-6736(02)07816-9  
46
- 47  
48 67 Leon J, Cheng CK, Neumann PJ. Alzheimer’s disease care: costs and potential savings.  
49 *Health Aff Proj Hope* 1998;**17**:206–16.  
50  
51  
52  
53  
54  
55  
56  
57  
58  
59  
60

## Figure Titles and Legends

Figure 1: QUALIDEM subdomain scores by care ward in patients with mild to severe dementia (MMSE score from 7 to 27, n = 400)

Figure 2: QUALIDEM subdomain scores by care ward, patients with very severe dementia (MMSE score < 7, n = 126)

Figure 3: Predictors of Health Related Quality of Life, Regression Coefficients, Bayesian Linear Mixed Model, Posterior Median (+50% and 89% High Density Interval)

## Supplementary Files

Supplementary File 1: Figure, Distribution of Patients' Main Diagnosis by Hospital

Supplementary File 2: Methodological comments

Supplementary File 3: Regression Models with Interaction Terms

Supplementary File 4: R Source Code (to use with R statistics, CC BY-NC 4.0 license)

Supplementary File 5: Regression Model with Alternative QUALIDEM-Score



Figure 1: QUALIDEM subdomain scores by care ward in patients with mild to severe dementia (MMSE score from 7 to 27, n = 400)

169x189mm (220 x 220 DPI)

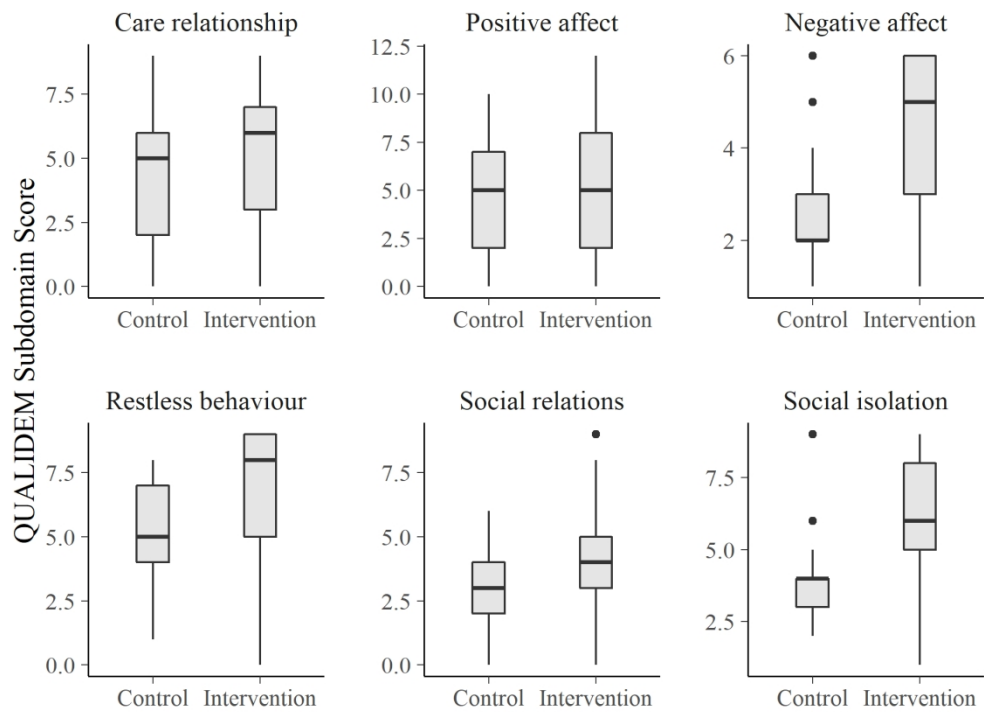

Figure 2: QUALIDEM subdomain scores by care ward, patients with very severe dementia (MMSE score < 7, n = 126)

169x125mm (300 x 300 DPI)



Figure 3: Predictors of Health Related Quality of Life, Regression Coefficients, Bayesian Linear Mixed Model, Posterior Median (+50% and 89% High Density Interval)

169x119mm (300 x 300 DPI)

Main Diagnosis by Hospital Ward

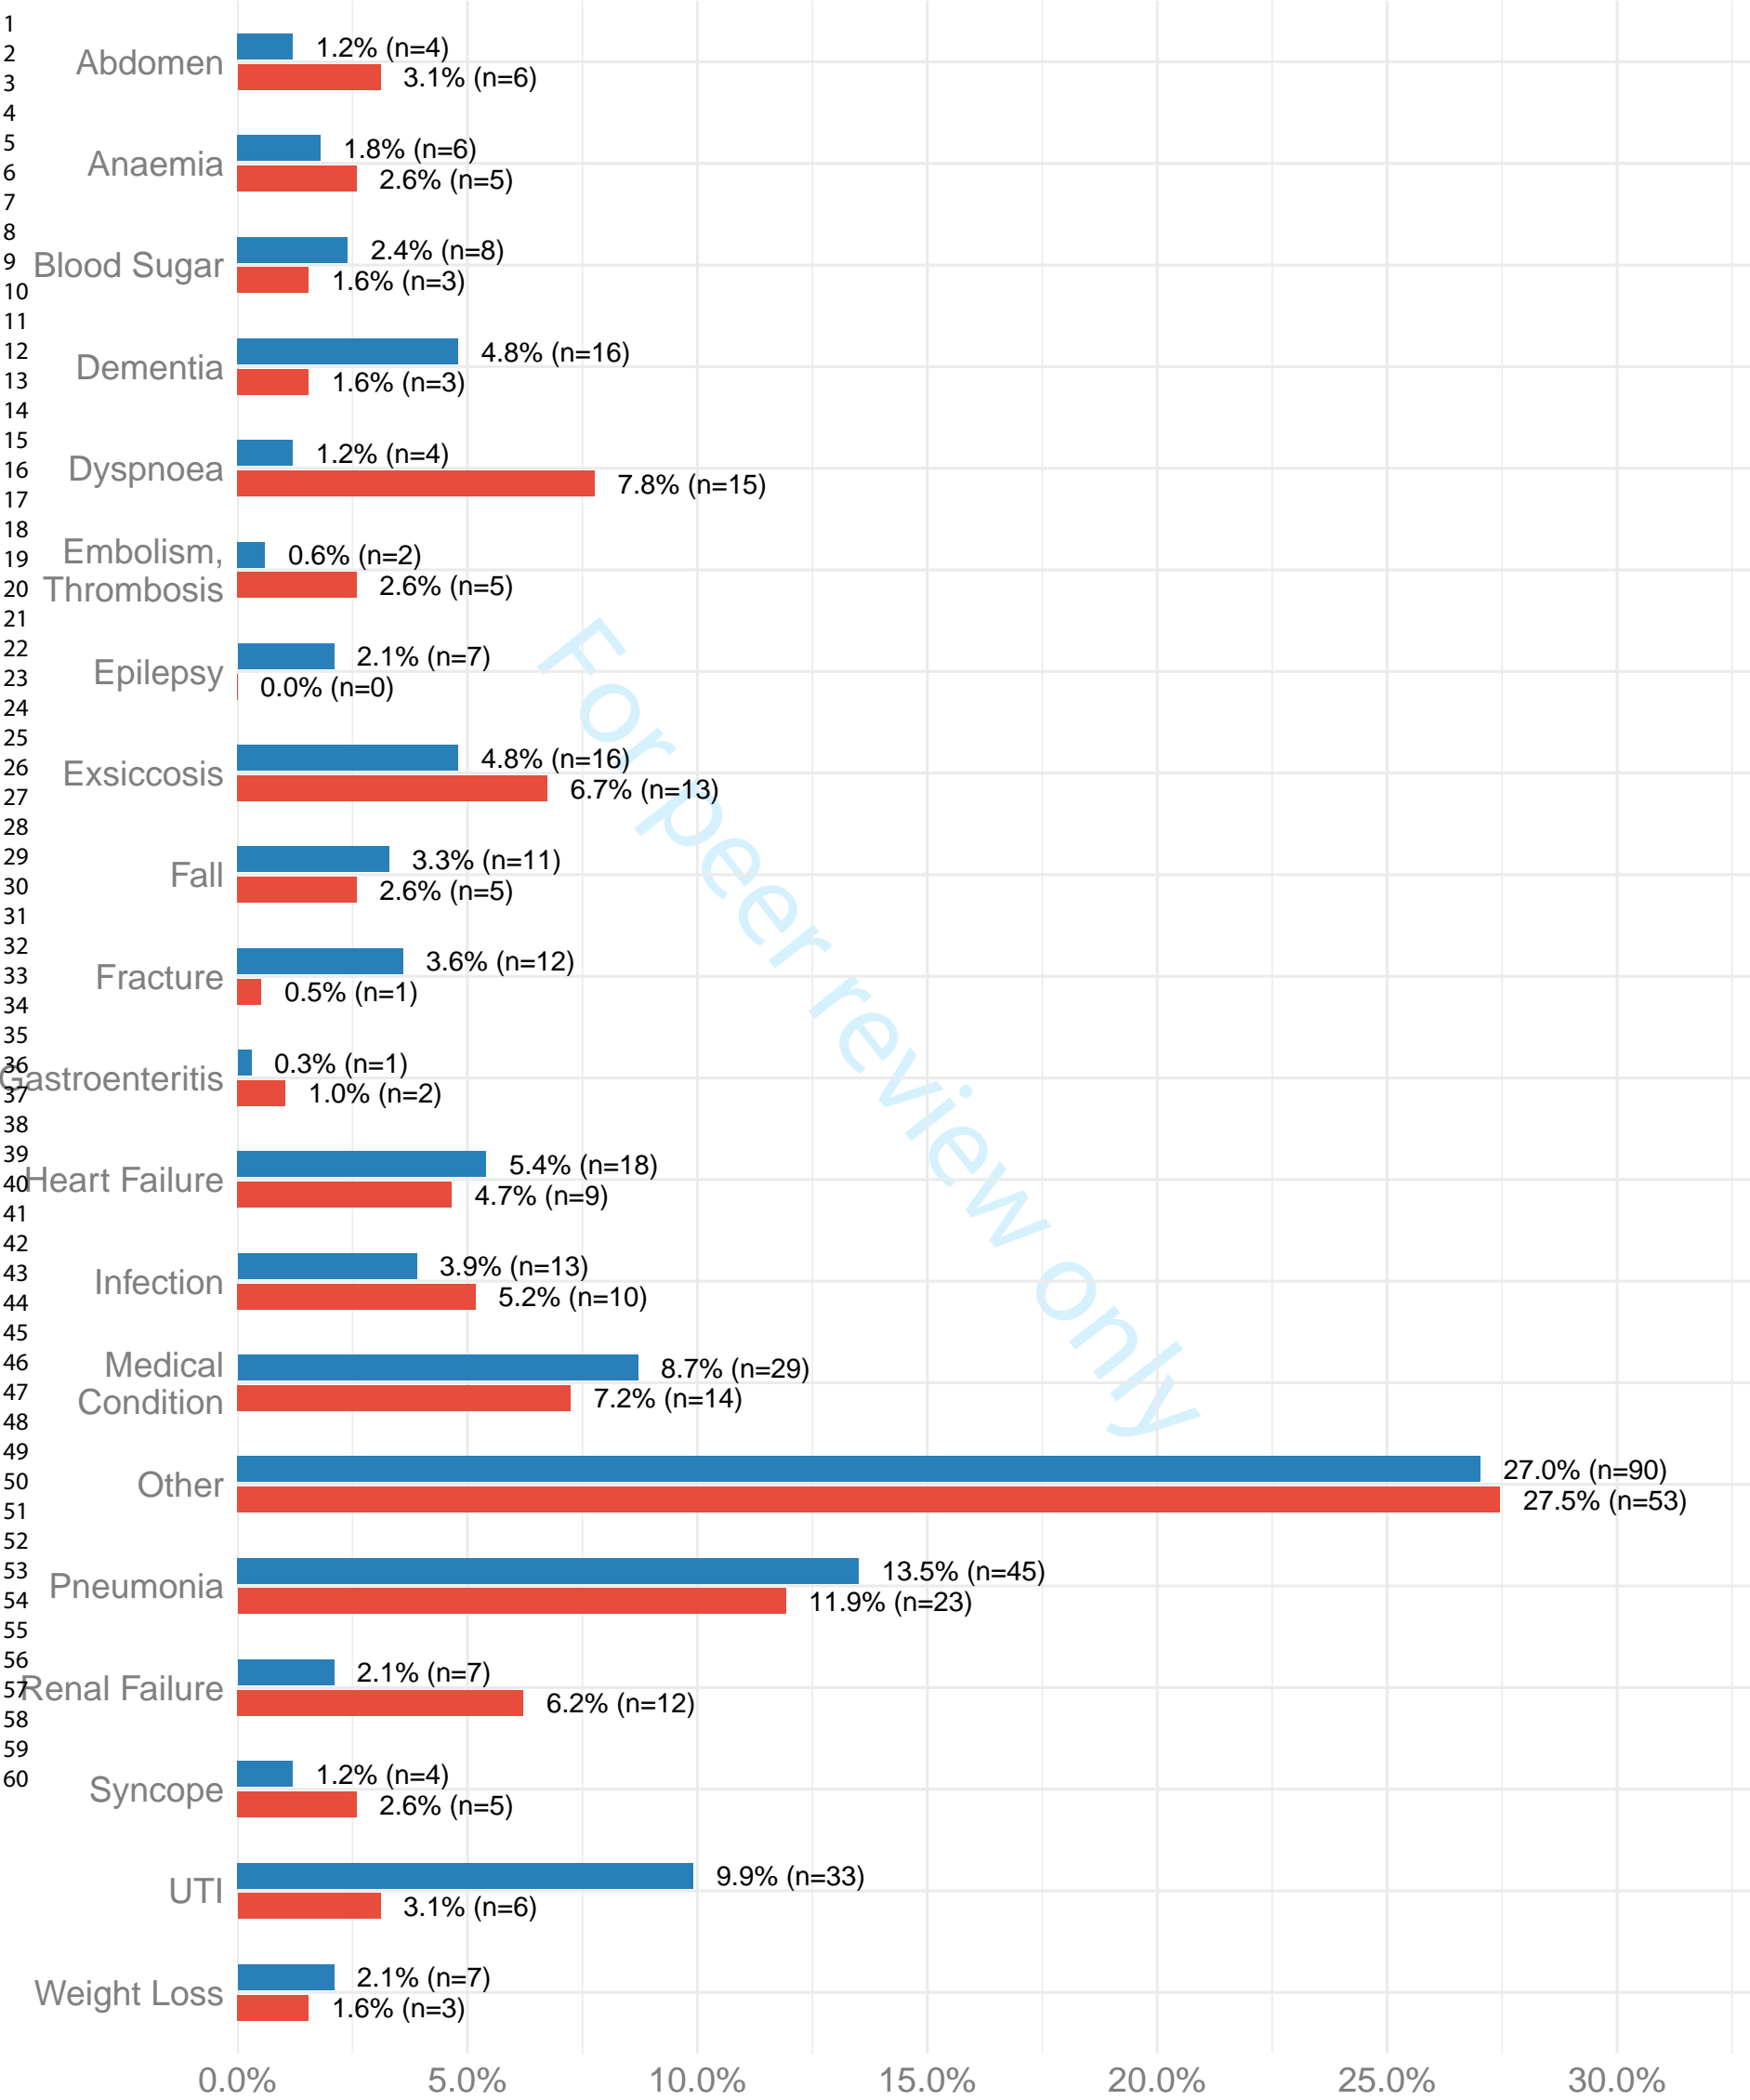

## Supplemental Material 2

### Quality of Life of Patients with Dementia in Acute Hospitals: Comparing a regular ward to a special care ward with dementia care concept. A Bayesian Multilevel Model Analysis.

#### Methodological comments

##### *1. Short note on Bayesian Methods*

Bayesian methods are probably not very common, and readers may ask “Why use Bayesian regression models?” Gelman et al.<sup>1</sup> give a well summarized answer to this question: “A pragmatic rationale for the use of Bayesian methods is the inherent flexibility introduced by their incorporation of multiple levels of randomness and the resultant ability to combine information from different sources, while incorporating all reasonable sources of uncertainty in inferential summaries. Such methods naturally lead to smoothed estimates in complicated data structures and consequently have the ability to obtain better real-world answers.”<sup>1</sup>. Shortly speaking, advantages of Bayesian methods are, for instance, the ability to derive probability statements for every quantity of interest or explicitly incorporate prior knowledge about parameters into the model.

##### *2. Distribution of Posterior Samples from the Regression Model*

Contrary to a frequentist approach, there is no unique point estimate in Bayesian analysis. The posterior median minimises the expected absolute error (i.e. the difference of estimates from true values over posterior samples), but there are many other plausible values to describe the association between predictors and outcome, which is called the *distribution of posterior samples*. Credible or Highest Density Intervals are based on quantiles of this distribution and indicate the probability of an estimate being inside this interval. In terms of inference, this allows us to say that with, e.g. 50% probability, the true effect of a *Special Care Ward* on our outcome lies between 5.1 and 6.6. Figure S1 shows the distribution of posterior samples from our regression model.

**Figure S1: Distribution of Posterior Samples from Regression Model**

### 3. Tabular Summary from the Regression Model

Table S1 provides a summary of the regression model, including the data for two different Highest Density Intervals as well as the ratio of effective number of samples. The ratio should be 1.0 or close to 1.0 and indicates whether the samples were efficient, which means that the results for the related coefficient are reliable. Furthermore, all  $R_{hat}$  values of the models were approximately 1. The  $R_{hat}$  statistic<sup>2</sup> measures the ratio of the average variance of the draws within each chain to the variance of the pooled draws across chains. If the chains have not converged to a common distribution, the  $R_{hat}$  statistic will tend to be greater than one, indicating that more iterations may be required for reliable results.



**Table S1:** Predictors of Quality of Life, Regression Coefficients, Bayesian Linear Mixed Model, Posterior Median (+50% and 89% Highest Density Intervals)

| Term                                   | Estimate | SE  | 50% HDI     | 89% HDI     | Ratio of effective Number of Samples |
|----------------------------------------|----------|-----|-------------|-------------|--------------------------------------|
| (Intercept)                            | 46.2     | 2.2 | 45.2 – 48.2 | 42.7 – 49.8 | 1.00                                 |
| Length of Stay                         | -0.1     | 0.1 | -0.1 – 0.0  | -0.2 – 0.1  | 1.00                                 |
| Age                                    | 1.2      | 0.5 | 0.8 – 1.5   | 0.4 – 2.1   | 1.00                                 |
| Moderate Dementia                      | 1.2      | 2.0 | -0.1 – 2.7  | -1.8 – 4.6  | 1.00                                 |
| Severe Dementia                        | -0.4     | 2.0 | -1.6 – 1.1  | -3.6 – 2.7  | 1.00                                 |
| Female                                 | 0.2      | 1.1 | -0.5 – 1.0  | -1.6 – 1.9  | 1.00                                 |
| Barthel Score                          | 2.0      | 0.5 | 1.8 – 2.4   | 1.3 – 2.8   | 1.00                                 |
| Physical Restraints (yes)              | -4.9     | 1.2 | -5.8 – -4.1 | -7.0 – -2.8 | 1.00                                 |
| Special Care Ward (Intervention)       | 5.7      | 1.2 | 4.9 – 6.5   | 3.8 – 7.6   | 1.00                                 |
| PAS-Score                              | -2.9     | 0.2 | -3.1 – -2.8 | -3.2 – -2.7 | 1.00                                 |
| Charlson's Comorbidity Index           | -0.1     | 0.3 | -0.4 – 0.1  | -0.6 – 0.5  | 1.00                                 |
| Psychotropic Drug Use (yes, as-needed) | -4.4     | 1.4 | -5.3 – -3.5 | -6.5 – -2.1 | 1.00                                 |
| sigma                                  | 11.9     | 0.4 | 11.5 – 12.0 | 11.3 – 12.5 | 1.00                                 |

All Rhat values ~ 1, all mcse < 0.05. Results based on 4 chains each 1000 iterations for each chain. LOO-adjusted R<sup>2</sup>: 0.500

#### 4. Test for Practical Equivalence of Parameters

Bayesian methods do not perform classical “null hypothesis significance tests”. Rather, to account for the uncertainty in estimation and the magnitude of parameter values, Kruschke<sup>3</sup> suggests checking whether parameter values lie inside a certain range that is considered as “practically no effect”.

Figure S2 shows the distribution of the 95% Highest Density Intervals of posterior samples and indicates whether these lie completely outside, completely inside or partially inside the region of practical equivalence (ROPE). If the HDI is completely outside the ROPE, the “null hypothesis” for this parameter is “rejected”. If the ROPE completely covers the HDI, i.e. all most credible values of a parameter are inside the region of practical equivalence, the null hypothesis is accepted. Else, it is undecided whether to accept or reject the null hypothesis.

The ROPE limits are specified following Kruschke's suggestion, which is defined as  $0 \pm SD(\text{dependent variable}) * 0.1$  for linear models.

Physical restraint, psychotropic drug use, agitation (PAS-score) and the intervention (special care ward) are those predictors that can be considered as relevant for our outcome.

**Figure S2:** 95%-Range of the Distribution of Posterior Samples from Regression Model; Region of Practical Equivalence emphasized in light-blue.



### 5. Summary of the Distribution of Prior and Posterior Samples

Bayesian regression models can incorporate prior information about the parameters. Informative or weakly informative priors have the advantage of regularization of parameters to rule out large effects. This leads to less biased results and reductions of outliers in situations where the sample size in general, or for certain groups in the data, is small. Where we found information about our parameters, we included it by specifying *informative priors*. For instance, studies suggest that physical restraints are, on average, associated with an about 5-point reduction in quality of life, so the *location* of the prior distribution of our parameter physical restraint is at -5.0 (see Table S2). *Weakly informative priors* simply have a location of zero.

**Table S2: Prior Summary**

| Predictor                    | Location | Scale |
|------------------------------|----------|-------|
| Length of Stay               | 0.00     | 6     |
| Age                          | 0.16     | 40    |
| Moderate dementia            | 0.00     | 42    |
| Severe dementia              | -0.44    | 42    |
| Sex, female                  | -3.22    | 42    |
| Barthel-Score                | 0.00     | 29    |
| Physical restraints          | -5.00    | 42    |
| Special Care Ward            | 0.00     | 42    |
| PAS-Score                    | 0.00     | 13    |
| Charlson's Comorbidity Index | 0.00     | 27    |
| Psychotic Drug Use           | 0.29     | 42    |

To prevent a too strong shrinkage of uncertainty, the *scale* of the prior distribution should be large enough. If no assumptions about the scale of the effect are made, a recommended way (for normally distributed priors) is to use a scale of 2.5 and adjust it by dividing the scale by the standard deviation of the related predictor and multiply it with the standard deviation of the outcome ( $2.5 * SD(y) / SD(x)$ , see <https://cran.r-project.org/web/packages/rstanarm/vignettes/priors.html>).

When the evidence in the data is *strong*, the impact of the prior information is rather low. On the other hand, if the evidence of the data is *weak*, for instance due to small sample size, the impact of the prior information increases. Figure S3 shows the summary of the prior and posterior sample distributions and suggests that the evidence in the data was rather strong and results were not biased due to unrealistic prior information.

**Figure S3: Posterior versus Prior Summary**

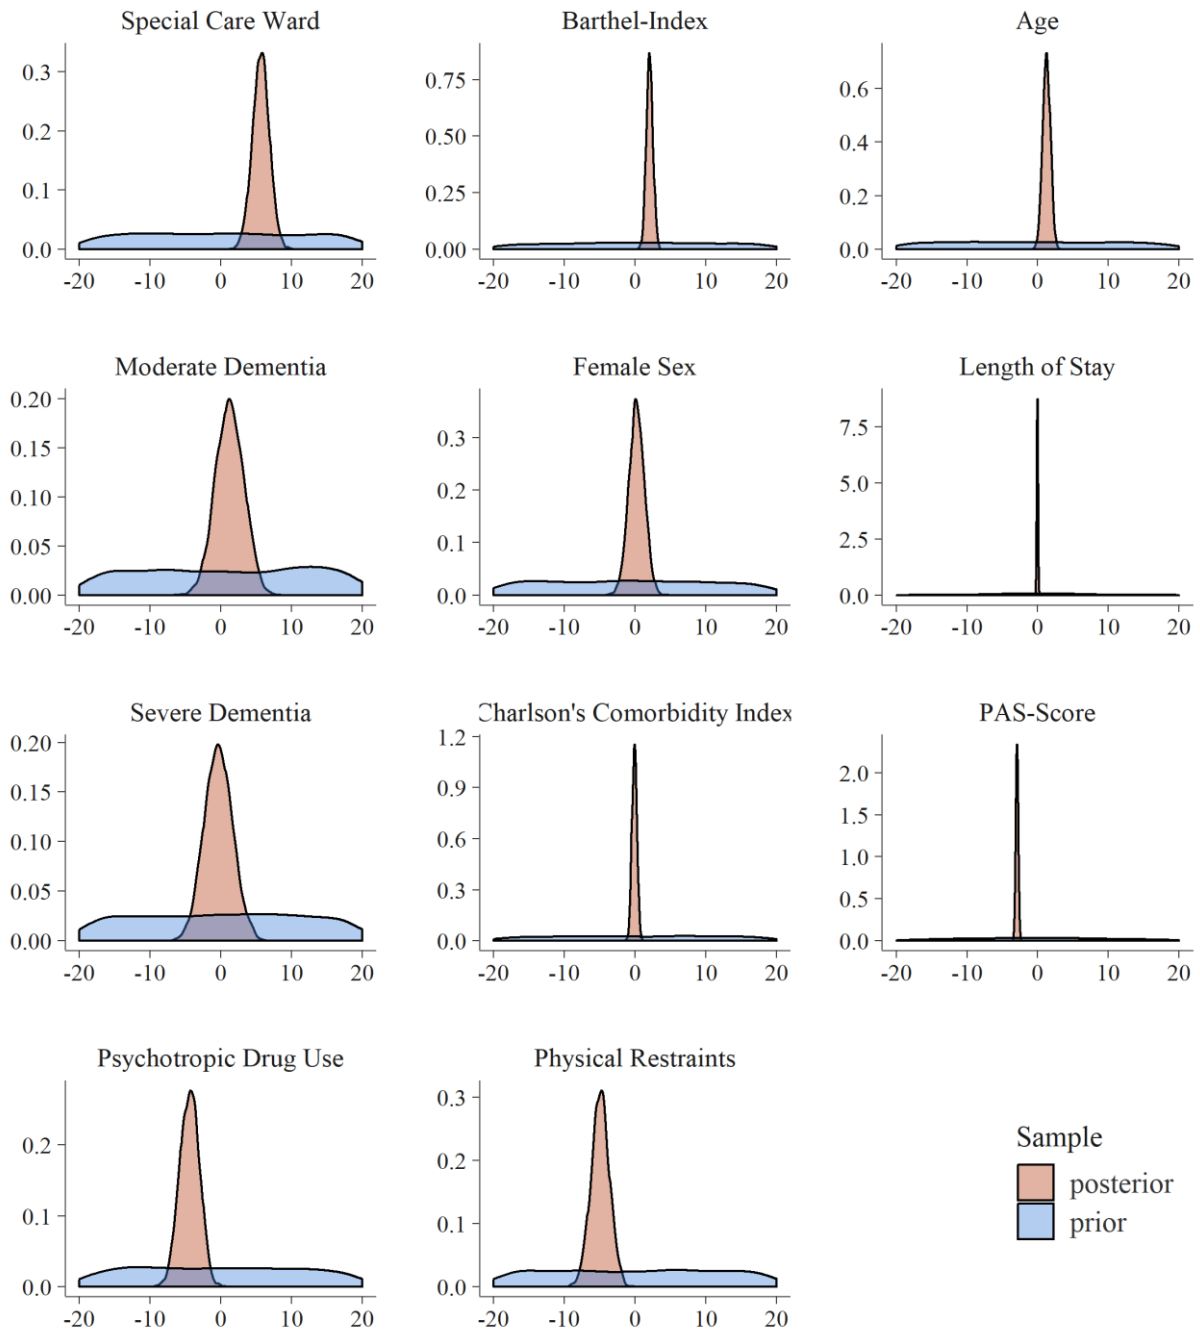

## 6. Trace plots

A trace plot provides a visual way to inspect sampling the behaviour and can be used, besides the Rhat-statistics, to assess convergence. The desired pattern is a “fat, hairy caterpillar”, which shows no suspicious bends<sup>4, 5</sup>. If the chains converged to the posterior distribution, we can be confident in our model-based inferences.

The trace plot in Figure S4 indicates that all chains have converged well.

**Figure S4:** Markov Chain trace plot, 4 chains with 1000 iterations each (excluding warmup-samples)

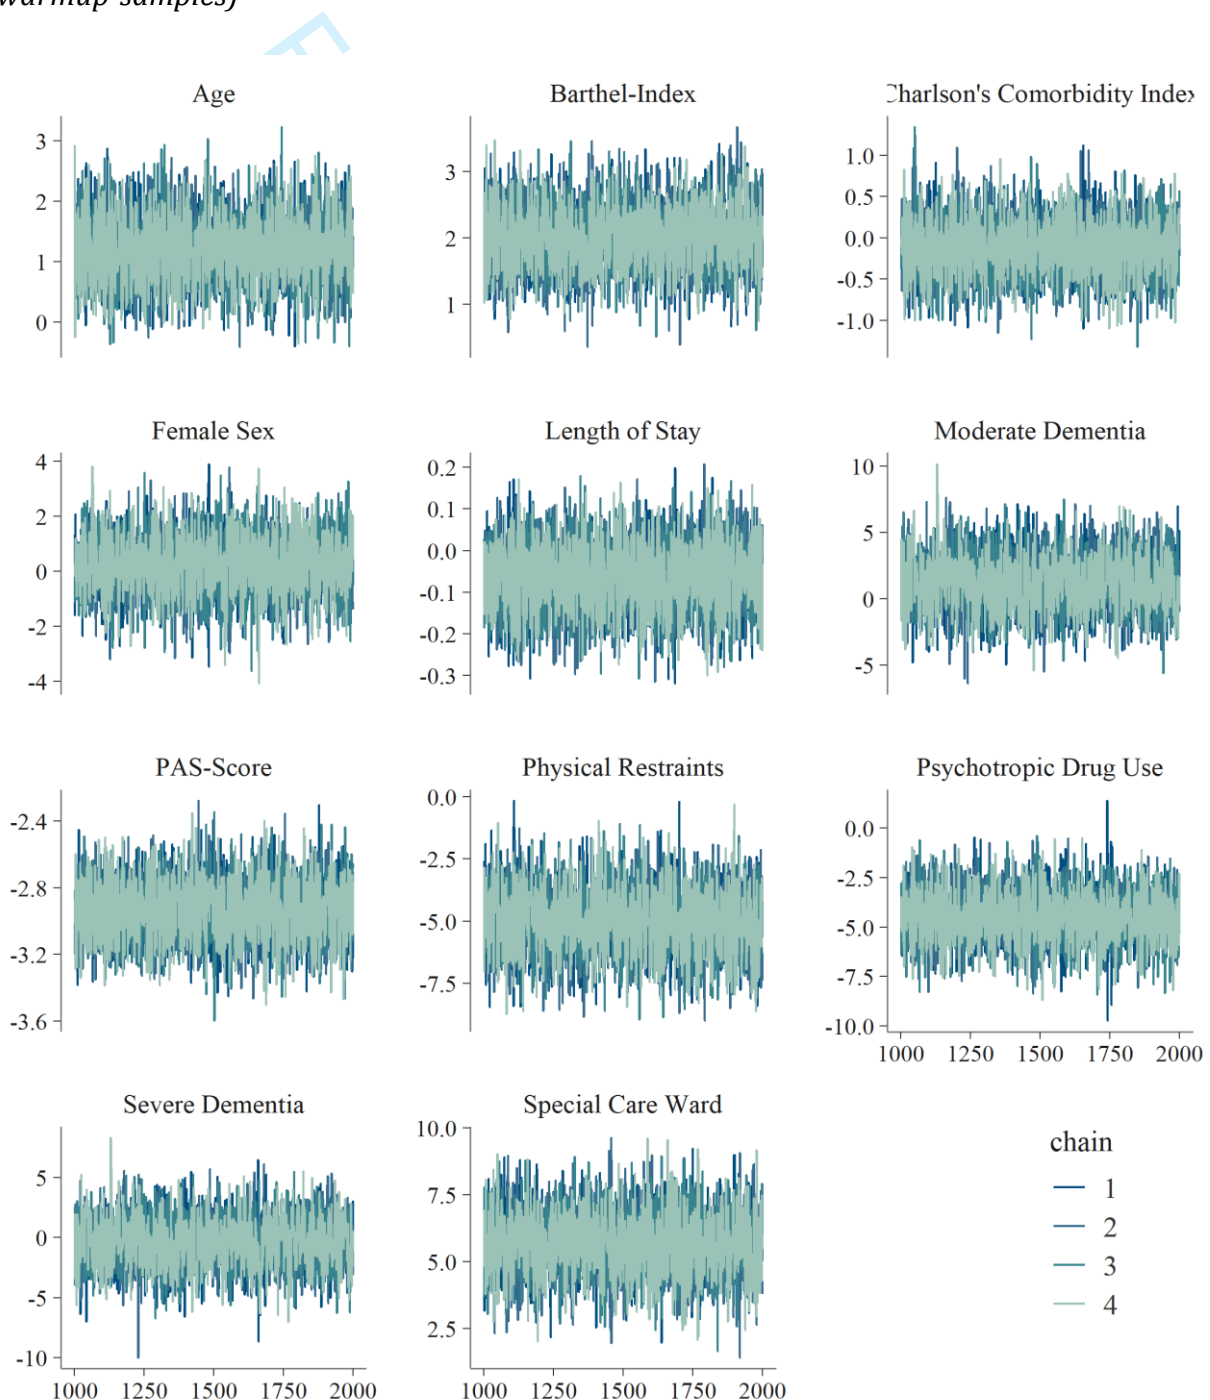

## 7. References

1. Gelman A, Carlin JB, Stern HS, Dunson DB, Vehtari A, Rubin DB. Bayesian Data Analysis. Third edition. Boca Raton: CRC Press; 2014: p.24
2. Gelman A, Rubin DB. Inference from Iterative Simulation Using Multiple Sequences. *Statistical Science*. 1992;7(4):457-472. doi:10.1214/ss/1177011136
3. Kruschke JK. Rejecting or Accepting Parameter Values in Bayesian Estimation. *Advances in Methods and Practices in Psychological Science*. 2018; doi: 10.1177/2515245918771304
4. Sorensen T, Hohenstein S, Vasishth S. Bayesian linear mixed models using Stan: A tutorial for psychologists, linguists, and cognitive scientists. *The Quantitative Methods for Psychology*. 2016;12:175–200.
5. Lunn D, Jackson C, Best N, Thomas A, Spiegelhalter D. *The BUGS book: a practical introduction to Bayesian analysis*. Boca Raton, FL: CRC Press, Taylor & Francis Group; 2013.

### Supplemental Material 3

To see if the complexity of patients' needs affect our findings, we calculated regression models with interaction terms between need factors moderated by hospitals. The figures S5 to S8 show the results of the interaction terms. Table S3 shows the coefficients in details. We found no "significant" associations for the interaction terms, concluding that the association between complexity of patients' needs and quality of life is not differing noticeably between the intervention and control group.

Plots were created using the *ggeffects* package in R (Lüdtke D. *ggeffects*: Tidy Data Frames of Marginal Effects from Regression Models. *Journal of Open Source Software*. 2018;3: 772. doi:10.21105/joss.00772).

**Figure S5:** Interaction between Barthel-Index and Intervention/Control-Group

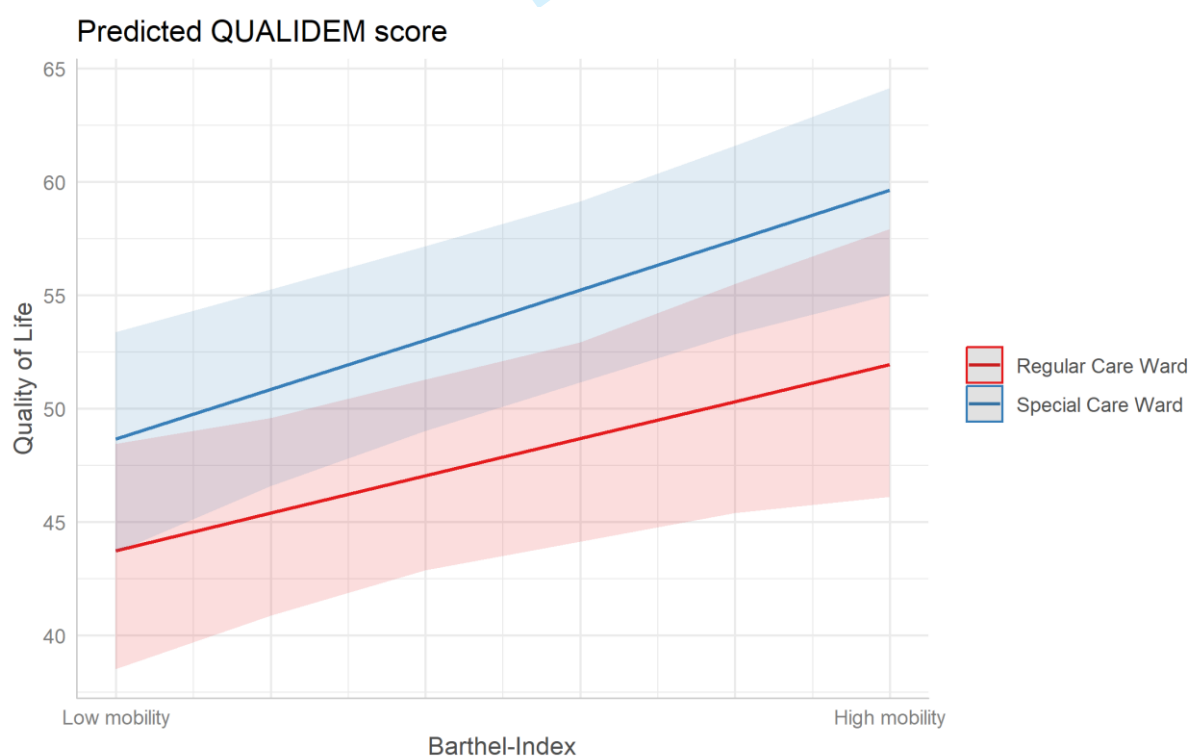

**Figure S6:** Interaction between Physical Restraints and Intervention/Control-Group

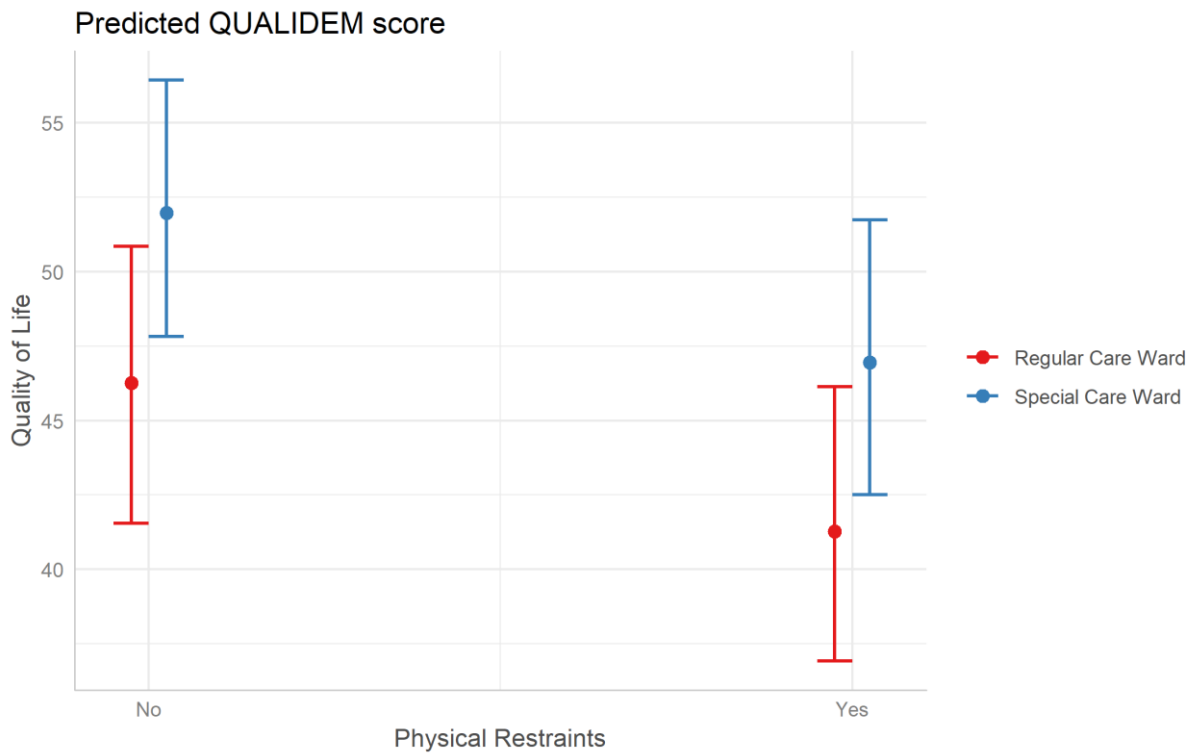

**Figure S7:** Interaction between PAS and Intervention/Control-Group

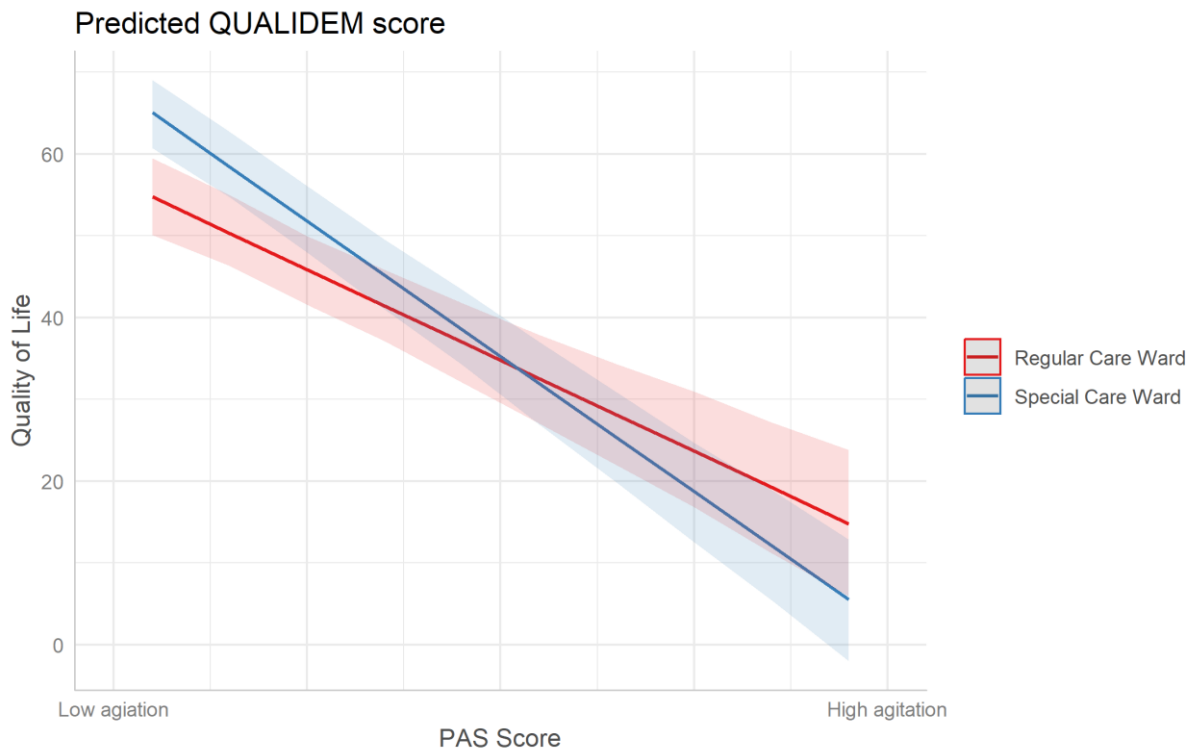



**Figure S8:** Interaction between Chemical Restraints and Intervention/Control-Group

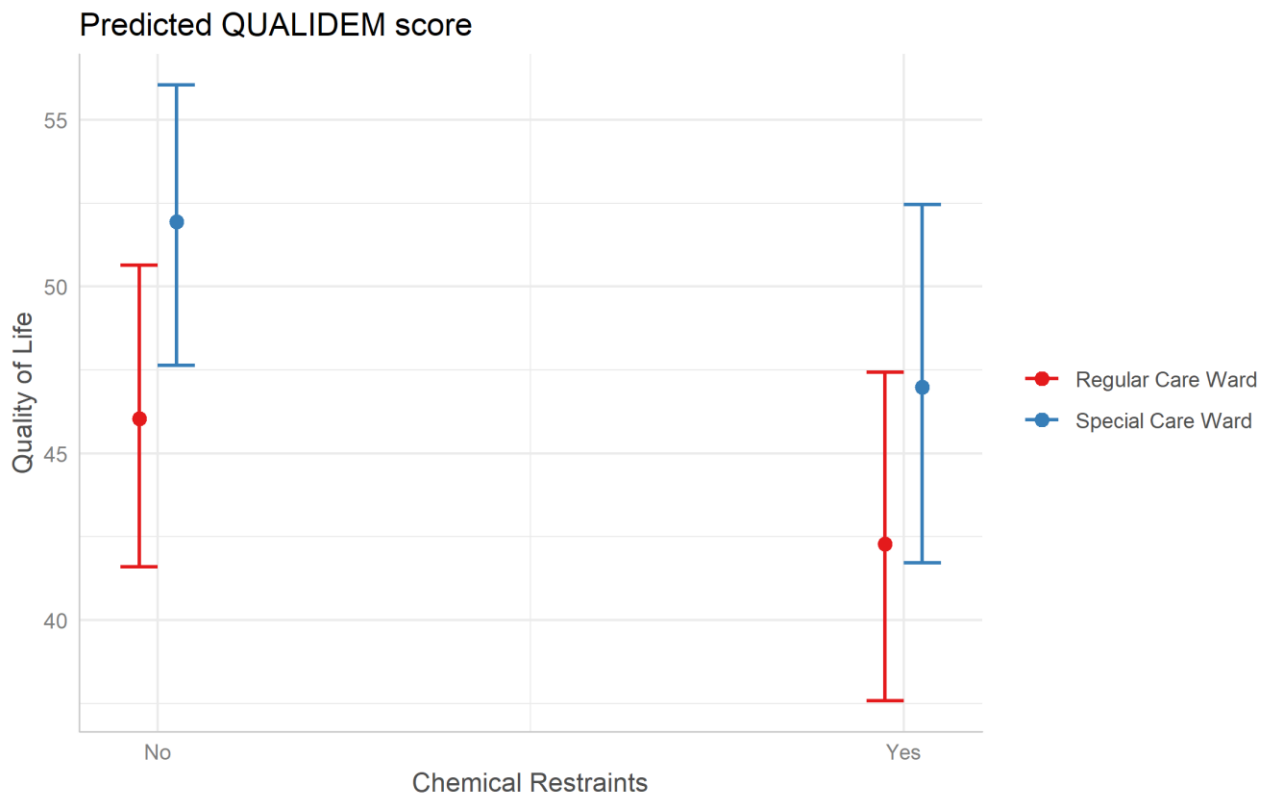

review only

**Table S3: Coefficients for Models with Interaction Terms**

| Terms                                  | Model: Interaction between Barthel and Hospital |               | Model: Interaction between Physical Restraints and Hospital |               | Model: Interaction between PAS and Hospital |               | Model: Interaction between Chemical Restraints and Hospital |               |
|----------------------------------------|-------------------------------------------------|---------------|-------------------------------------------------------------|---------------|---------------------------------------------|---------------|-------------------------------------------------------------|---------------|
|                                        | Estimates                                       | HDI (95%)     | Estimates                                                   | HDI (95%)     | Estimates                                   | HDI (95%)     | Estimates                                                   | HDI (95%)     |
| (Intercept)                            | 36.18                                           | 26.19 – 45.67 | 36.31                                                       | 27.00 – 46.10 | 36.57                                       | 27.11 – 45.71 | 36.16                                                       | 26.45 – 45.69 |
| Length of Stay                         | -0.07                                           | -0.23 – 0.11  | -0.06                                                       | -0.23 – 0.09  | -0.07                                       | -0.23 – 0.10  | -0.06                                                       | -0.22 – 0.10  |
| Age                                    | 0.12                                            | 0.01 – 0.23   | 0.12                                                        | 0.02 – 0.23   | 0.12                                        | 0.01 – 0.22   | 0.12                                                        | 0.02 – 0.23   |
| Moderate Dementia                      | 1.21                                            | -2.79 – 5.13  | 1.19                                                        | -2.72 – 5.24  | 1.19                                        | -2.83 – 4.72  | 1.25                                                        | -2.95 – 4.89  |
| Severe Dementia                        | -0.34                                           | -4.30 – 3.70  | -0.44                                                       | -4.45 – 3.65  | -0.74                                       | -4.54 – 3.10  | -0.30                                                       | -4.45 – 3.59  |
| Female                                 | 0.16                                            | -2.06 – 2.29  | 0.19                                                        | -1.98 – 2.29  | 0.52                                        | -1.53 – 2.70  | 0.23                                                        | -1.76 – 2.53  |
| Charlson's Comorbidity Index           | -0.12                                           | -0.81 – 0.59  | -0.11                                                       | -0.77 – 0.64  | -0.11                                       | -0.77 – 0.59  | -0.11                                                       | -0.82 – 0.59  |
| Barthel Score                          | 1.66                                            | 0.27 – 2.99   | 2.02                                                        | 1.15 – 2.88   | 2.07                                        | 1.17 – 2.97   | 2.05                                                        | 1.13 – 2.98   |
| Physical Restraints (yes)              | 5.74                                            | 3.48 – 7.90   | 5.76                                                        | 2.67 – 8.72   | 5.95                                        | 3.64 – 8.18   | 5.94                                                        | 3.44 – 8.62   |
| Special Care Ward (Intervention)       | -5.02                                           | -7.65 – -2.54 | -4.92                                                       | -8.57 – -1.11 | -4.94                                       | -7.60 – -2.41 | -4.96                                                       | -7.83 – -2.58 |
| PAS-Score                              | -2.96                                           | -3.30 – -2.62 | -2.94                                                       | -3.30 – -2.61 | -2.22                                       | -2.77 – -1.66 | -2.93                                                       | -3.27 – -2.59 |
| Psychotropic Drug Use (yes, as-needed) | -4.43                                           | -7.10 – -1.83 | -4.40                                                       | -7.08 – -1.87 | -4.30                                       | -6.81 – -1.56 | -3.76                                                       | -7.83 – -0.03 |
| Barthel * Intervention                 | 0.52                                            | -1.00 – 2.06  |                                                             |               |                                             |               |                                                             |               |
| Phys. Restr. * Intervention            |                                                 |               | -0.09                                                       | -4.46 – 4.66  |                                             |               |                                                             |               |
| PAS * Intervention                     |                                                 |               |                                                             |               | -1.09                                       | -1.76 – -0.42 |                                                             |               |
| Chem. Restr. * Intervention            |                                                 |               |                                                             |               |                                             |               | -1.15                                                       | -6.63 – 4.27  |

## Supplemental Material 4 – R Source Code

```

1
2 library(tidyverse)
3 library(gggridges)
4 library(sjmisc)
5 library(sjlabelled)
6 library(sjstats)
7 library(sjPlot)
8 library(insight)
9 library(bayestestR)
10 library(brms)
11
12 # Data available at https://doi.org/10.5281/zenodo.1479676
13
14 # load data ----
15 load("Dataset.RData")
16
17 # divide age by 10
18 d$age10 <- d$age / 10
19
20 # Labels for final model ----
21
22 labs <-
23   c(
24     stay_c = "Length of Stay",
25     age = "Age",
26     age10 = "Age",
27     mmse2 = "Moderate Dementia",
28     mmse3 = "Severe Dementia",
29     sex2 = "Female Sex",
30     barthel_code = "Barthel-Index",
31     groupintervention = "Special Care Ward",
32     physres1 = "Physical Restraints",
33     pas_c = "PAS-Score",
34     cci_c = "Charlson's Comorbidity Index",
35     chemicalres1 = "Psychotropic Drug Use", # oder as-needed
36     b_stay_c = "Length of Stay",
37     b_age = "Age",
38     b_age10 = "Age",
39     b_mmse2 = "Moderate Dementia",
40     b_mmse3 = "Severe Dementia",
41     b_sex2 = "Female Sex",
42     b_barthel_code = "Barthel-Index",
43     b_groupintervention = "Special Care Ward",
44     b_physres1 = "Physical Restraints",
45     b_pas_c = "PAS-Score",
46     b_cci_c = "Charlson's Comorbidity Index",
47     b_chemicalres1 = "Psychotropic Drug Use" # oder as-needed
48   )
49
50 # prior-definition in brms ----
51
52 # scale is 2.5 * sd(y) / sd(x)
53
54 bprior <-
55   prior(normal(0, 6), class = "b", coef = "stay_c") +
56   prior(normal(.1554, 40), class = "b", coef = "age10") +
57   prior(normal(0, 42), class = "b", coef = "mmse2") +
58   prior(normal(-.444, 42), class = "b", coef = "mmse3") +
59   prior(normal(-3.219, 42), class = "b", coef = "sex2") +
60   prior(normal(0, 29), class = "b", coef = "barthel_code") +
61   prior(normal(-5, 42), class = "b", coef = "physres1") +
62   prior(normal(0, 42), class = "b", coef = "groupintervention") +
63   prior(normal(0, 13), class = "b", coef = "pas_c") +
64   prior(normal(.2925, 42), class = "b", coef = "chemicalres1") +
65   prior(normal(0, 26.77), class = "b", coef = "cci_c")
66
67 # see:
68 # Beerens HC, Sutcliffe C, Renom-Guiteras A, et al. Quality of Life and
69 # Quality of Care for People With Dementia Receiving Long Term Institutional
70 # Care or Professional Home Care: The European RightTimePlaceCare Study.

```

```

# Journal of the American Medical Directors Association. 2014;15(1):54-61.
1 # doi:10.1016/j.jamda.2013.09.010
2 #
3 # QoL-Scale ranges from 13-52 (40 points). Effects from those study are
4 # multiplied by 2.5 (rescaling 40-points to 100-point-scale of QUALIDEM)
5 # see:
6 # Barca, M. L., Engedal, K., Laks, J., & Selbæk, G. (2011). Quality of Life
7 # among Elderly Patients with Dementia in Institutions. Dementia and Geriatric
8 # Cognitive Disorders, 31(6), 435-442. https://doi.org/10.1159/000328969
9 # QoL-scale ranges from 11-55 (45 points). Effects from those study are
10 # multiplied by 2.2 (rescaling 45-points to 100-point-scale of QUALIDEM)
11
12
13 # model formula ----
14 mf <-
15   formula(
16     QoL ~ stay_c + age10 + mmse + sex + cci_c +
17     barthel_code + physres + group + pas_c +
18     chemicalres + (1 | maindiag)
19   )
20
21 # brms-model ----
22
23 set.seed(1207)
24
25 m2a <- brm(
26   formula = mf,
27   data = d,
28   prior = bprior,
29   sample_prior = TRUE
30 )
31
32 # Figure 3 ----
33 theme_set(theme_sjplot2(base_size = 14, base_family = "serif"))
34
35 p <- plot_model(
36   m2a,
37   title = "",
38   axis.labels = labs,
39   sort.est = T,
40   colors = c("grey30"),
41   axis.title = "Change in QUALIDEM-Score",
42   wrap.title = 100,
43   wrap.labels = 20,
44   width = .2,
45   grid.breaks = 2,
46   size.inner = .1
47 ) +
48   ylab("Change in QUALIDEM Total Score") +
49   theme_sjplot2(base_size = 14, base_family = "serif")
50
51 p_pdf <- p +
52   theme_sjplot2(base_size = 28, base_family = "serif") +
53   theme(
54     panel.grid.major = element_line(size = .1),
55     panel.grid.minor = element_line(size = .05),
56     axis.line.x = element_line(size = .15),
57     axis.line.y = element_line(size = .15)
58   )
59
60 ggsave(filename = "Fig3.tiff", plot = p, width = 170, height = 120, units = "mm", dpi = 300,
61 compression = "lzw")
62 ggsave(filename = "Fig3.pdf", scale = 2, plot = p_pdf, width = 170, height = 120, units = "mm",
63 dpi = 300)
64
65 # Appendix S1: Test for practical equivalence ----
66
67 rope(m2a, rope = c(-6, 6))

```

```

1 rope(m2a, rope = c(-7.5, 7.5))
2 equivalence_test(m2a, parameters = "^(?!prior)")
3 equivalence_test(m2a, parameters = "^(?!prior)") %>% plot()
4
5 # Appendix S1, Table Regression Coefficients ----
6
7 tab_df(tidy_stan(m2a, prob = c(.5, .89), digits = 1))
8
9 # Appendix S1, Prior Adjustment ----
10 insight::get_priors(m2a)
11
12
13 # Appendix S1, Figure distribution Posterior Samples ----
14
15 tmp <- m2a %>%
16   as_tibble() %>%
17   select(2:12) %>%
18   gather(key = "predictor", value = "estimate") %>%
19   to_factor(predictor)
20
21 tmp$predictor <- lvl_reorder(tmp$predictor, c(9, 4, 8, 3, 7, 11, 10, 6, 1, 2, 5))
22
23 p2 <- ggplot(tmp, aes(x = estimate, y = predictor)) +
24   geom_vline(xintercept = 0, colour = "grey70", size = .8) +
25   geom_density_ridges2(rel_min_height = 0.001, scale = 2, alpha = .5) +
26   scale_x_continuous(breaks = seq(-8, 8, 2)) +
27   scale_y_discrete(labels = labs) +
28   labs(x = "Change in QUALIDEM-Score", y = NULL) +
29   theme_sjplot2(base_size = 14, base_family = "serif")
30
31 ggsave(filename = "FigS1.tiff", plot = p2, width = 190, height = 120, units = "mm", dpi = 300)
32
33 # Appendix S1, test for practical equivalence ----
34 ## Short version
35 equivalence_test(m2a, parameters = "^(?!prior)")
36 equivalence_test(m2a, parameters = "^(?!prior)") %>% plot()
37
38 ## More beautiful tweaked version
39
40 tmp.hdi <- hdi(m2a, prob = .95) %>%
41   slice(c(-c(1, 13:23)))
42
43 tmp2 <- m2a %>%
44   as_tibble() %>%
45   select(2:12) %>%
46   map2_df(tmp.hdi$CI_low, function(x, y) {
47     x[x < y] <- NA
48     x
49   }) %>%
50   map2_df(tmp.hdi$CI_high, function(x, y) {
51     x[x > y] <- NA
52     x
53   }) %>%
54   gather(key = "predictor", value = "estimate") %>%
55   to_factor(predictor)
56
57 tmp2$predictor <- lvl_reorder(tmp2$predictor, c(9, 4, 8, 3, 7, 11, 10, 6, 1, 2, 5))
58
59 tmp2$grp <- dplyr::case_when(
60   tmp2$predictor %in% c("b_stay_c", "b_cci_c") ~ "reject",
61   tmp2$predictor %in% c("b_age10", "b_mmse2", "b_mmse3", "b_sex2", "b_barthel_code") ~
62   "undecided",
63   TRUE ~ "accept"
64 )
65
66 p3 <- ggplot(tmp2, aes(x = estimate, y = predictor, fill = grp)) +
67   # rope based on "equi_test(model)".

```

```

1   annotate("rect", xmin = -1.7, xmax = 1.7, ymin = 0, ymax = Inf, fill = sjplot_pal(palette =
2   "us")[1], alpha = 0.15) +
3   geom_vline(xintercept = 0, colour = "grey70", size = .8) +
4   geom_density_ridges2(rel_min_height = 0.01, scale = 2, alpha = .4) +
5   scale_x_continuous(breaks = seq(-8, 8, 2)) +
6   scale_y_discrete(labels = labs) +
7   scale_fill_manual(values = sjplot_pal()[c(3, 1, 7)]) +
8   labs(x = "Change in QUALIDEM-Score", y = NULL, fill = "Acceptance of Parameters") +
9   theme_sjplot2(base_size = 14, base_family = "serif") +
10  theme(
11    legend.title = element_text(size = 13),
12    legend.position = "bottom",
13    axis.line.x = element_line(colour = "grey50"),
14    axis.line.y = element_line(colour = "grey50")
15  )
16  ggsave(filename = "FigS2.tiff", plot = p3, width = 190, height = 120, units = "mm", dpi = 300)
17
18  # Appendix S1, Posterior-Prior-Check ----
19
20  ## Short version
21  plot_model(m2a, type = "diag", axis.lim = c(-20, 20))
22
23  ## More beautiful tweaked version
24
25  pr_samp <- prior_samples(m2a) %>%
26    select(starts_with("b_")) %>%
27    gather(key = "Term", value = "Estimate") %>%
28    mutate(Sample = "prior")
29
30  ps_samp <- posterior_samples(m2a) %>%
31    select(starts_with("b_"), -b_Intercept) %>%
32    gather(key = "Term", value = "Estimate") %>%
33    mutate(Sample = "posterior")
34
35  m_pp_data <- bind_rows(pr_samp, ps_samp) %>% to_factor(Term)
36  m_pp_data$Term <- lvls_reorder(m_pp_data$Term, rev(c(8, 3, 10, 4, 7, 5, 11, 6, 1, 2, 9)))
37
38  p4 <- ggplot(m_pp_data, aes(x = Estimate, fill = Sample)) +
39    geom_density(alpha = .4) +
40    scale_x_continuous(limits = c(-20, 20)) +
41    facet_wrap(
42      ~ Term,
43      scales = "free",
44      labeller = labeller(Term = labs),
45      nrow = 4
46    ) +
47    labs(x = NULL, y = NULL) +
48    bayesplot::theme_default(base_size = 13) +
49    theme(
50      axis.line.x = element_line(colour = "grey50"),
51      axis.line.y = element_line(colour = "grey50"),
52      axis.text = element_text(colour = "grey10"),
53      axis.title = element_text(colour = "black"),
54      # strip.background = element_rect(colour = "grey50", fill = "grey90"),
55      # strip.text = element_text(colour = "grey20"),
56      legend.title = element_text(colour = "grey10"),
57      legend.text = element_text(colour = "grey20"),
58      legend.position = c(.5, .15),
59      legend.justification = c(-2, 1)
60    ) +
61    scale_fill_manual(values = sjplot_pal("breakfast club")[c(1, 3)])
62
63  ggsave(filename = "FigS3.tiff", plot = p4, width = 190, height = 214, units = "mm", dpi = 300)
64
65  # Appendix S1, Traceplot ----
66
67  p <- rstan::traceplot(m2a$fit, pars = colnames(as.data.frame(m2a))[1:12], inc_warmup = F)
68  p$data$parameter <- as.character(p$data$parameter)
69  tmp <- p$data %>%
70    filter(parameter != "b_Intercept")

```

```
for (i in 1:length(labs)) {
1   if (names(labs)[i] %in% tmp$parameter) {
2     r <- which(tmp$parameter == names(labs)[i])
3     tmp$parameter[r] <- labs[i]
4   }
5 }
6 p5 <- ggplot(tmp, aes(x = iteration, y = value, colour = chain)) +
7   geom_line() +
8   facet_wrap(~parameter, scales = "free_y", ncol = 3) +
9   scale_color_manual(values = sjplot_pal("us", n = 4)) +
10  labs(x = NULL, y = NULL) +
11  bayesplot::theme_default(base_size = 13) +
12  theme(
13    axis.line.x      = element_line(colour = "grey50"),
14    axis.line.y      = element_line(colour = "grey50"),
15    axis.text        = element_text(colour = "grey10"),
16    axis.title       = element_text(colour = "black"),
17    # strip.background = element_rect(colour = "grey50", fill = "grey90"),
18    # strip.text       = element_text(colour = "grey20"),
19    legend.title     = element_text(colour = "grey10"),
20    legend.text      = element_text(colour = "grey20"),
21    legend.position  = c(.5, .15),
22    legend.justification = c(-4.2, 0.7)
23  )
24 ggsave(filename = "FigS4.tiff", compress = "lzw", plot = p5, width = 190, height = 214, units =
25 "mm", dpi = 300)
26
27
28
29
30
31
32
33
34
35
36
37
38
39
40
41
42
43
44
45
46
47
48
49
50
51
52
53
54
55
56
57
58
59
60
```

## Supplemental Material 5

### Regression Model with Alternative QUALIDEM-Score

A limitation of the QUALIDEM total score is how it is calculated for patients with very severe dementia. As recommended by the authors of QUALIDEM, only six of the nine subscales are used to calculate the total score [1]. Technically speaking, this is similar to simple mean value imputation of the missing scores for the three omitted subscales, resulting in biased and underestimated measurement error variance for this group. In order to see to which extent an alternative computation of the QUALIDEM total score might be more appropriate than the recommended approach, we calculated another regression model (called “New Model”, see *Table S4*). This model used a QUALIDEM total score based on full imputation of missing values for *all nine* subscales for patients with very severe dementia (instead of only using six subscales).

Table S4 shows the result of the new model in comparison to the main model presented in the manuscript. Both results for the estimates as well as standard error and HDI are very similar. This suggests that in our particular case we found no improvement in the estimation accuracy after imputing the missing values for the originally omitted three subscales for people with very severe dementia. Still it might be statistically more sound to either have the same amount of subscales for all groups of dementia severity or to consider appropriate missing data imputation algorithms for the group with very severe dementia. Thus, future research in QoL for patients with dementia should also focus on the reliability and validity of the QUALIDEM.



**Table S4:** Comparison of Models for two different QoL-Scores

| Term                                   | New Model with full imputed QoL-Score for very severe dementia |     |             | Main Model |     |             |
|----------------------------------------|----------------------------------------------------------------|-----|-------------|------------|-----|-------------|
|                                        | Estimate                                                       | SE  | 89% HDI     | Estimate   | SE  | 89% HDI     |
| Length of Stay                         | -0.0                                                           | 0.1 | -0.2 – 0.1  | -0.1       | 0.1 | -0.2 – 0.1  |
| Age                                    | 0.8                                                            | 0.5 | -0.0 – 1.6  | 1.2        | 0.5 | 0.4 – 2.1   |
| Moderate Dementia                      | 1.1                                                            | 1.9 | -1.8 – 4.1  | 1.2        | 2.0 | -1.8 – 4.6  |
| Severe Dementia                        | -0.3                                                           | 1.9 | -3.2 – 2.7  | -0.4       | 2.0 | -3.6 – 2.7  |
| Female                                 | 0.6                                                            | 1.0 | -1.0 – 2.2  | 0.2        | 1.1 | -1.6 – 1.9  |
| Barthel Score                          | 2.0                                                            | 0.4 | 1.3 – 2.7   | 2.0        | 0.5 | 1.3 – 2.8   |
| Physical Restraints (yes)              | -4.1                                                           | 1.3 | -6.1 – -2.1 | -4.9       | 1.2 | -7.0 – -2.8 |
| Special Care Ward (Intervention)       | 5.2                                                            | 1.1 | 3.4 – 6.9   | 5.7        | 1.2 | 3.8 – 7.6   |
| PAS-Score                              | -2.7                                                           | 0.2 | -3.0 – -2.4 | -2.9       | 0.2 | -3.2 – -2.7 |
| Charlson's Comorbidity Index           | 0.0                                                            | 0.3 | -0.5 – 0.5  | -0.1       | 0.3 | -0.6 – 0.5  |
| Psychotropic Drug Use (yes, as-needed) | -4.3                                                           | 1.3 | -6.3 – -2.3 | -4.4       | 1.4 | -6.5 – -2.1 |

All Rhat values ~ 1, all mcse < 0.05. Results based on 4 chains each 1000 iterations for each chain.

1 Dichter MN, Quasdorf T, Schwab CGG, et al. Dementia care mapping: effects on residents' quality of life and challenging behavior in German nursing homes. A quasi-experimental trial. *International Psychogeriatrics* 2015;27:1875–92.  
doi:10.1017/S1041610215000927

**STROBE 2007 (v4) Statement—Checklist of items that should be included in reports of case-control studies**

| Section/Topic             | Item # | Recommendation                                                                                                                                                                       | Reported on page # |
|---------------------------|--------|--------------------------------------------------------------------------------------------------------------------------------------------------------------------------------------|--------------------|
| <b>Title and abstract</b> | 1      | (a) Indicate the study’s design with a commonly used term in the title or the abstract                                                                                               | 1                  |
|                           |        | (b) Provide in the abstract an informative and balanced summary of what was done and what was found                                                                                  | 2                  |
| <b>Introduction</b>       |        |                                                                                                                                                                                      |                    |
| Background/rationale      | 2      | Explain the scientific background and rationale for the investigation being reported                                                                                                 | 4                  |
| Objectives                | 3      | State specific objectives, including any prespecified hypotheses                                                                                                                     | 4-5                |
| <b>Methods</b>            |        |                                                                                                                                                                                      |                    |
| Study design              | 4      | Present key elements of study design early in the paper                                                                                                                              | 5                  |
| Setting                   | 5      | Describe the setting, locations, and relevant dates, including periods of recruitment, exposure, follow-up, and data collection                                                      | 6-7                |
| Participants              | 6      | (a) Give the eligibility criteria, and the sources and methods of case ascertainment and control selection. Give the rationale for the choice of cases and controls                  | 6-7                |
|                           |        | (b) For matched studies, give matching criteria and the number of controls per case                                                                                                  |                    |
| Variables                 | 7      | Clearly define all outcomes, exposures, predictors, potential confounders, and effect modifiers. Give diagnostic criteria, if applicable                                             | 8-10               |
| Data sources/ measurement | 8*     | For each variable of interest, give sources of data and details of methods of assessment (measurement). Describe comparability of assessment methods if there is more than one group | 8-10               |
| Bias                      | 9      | Describe any efforts to address potential sources of bias                                                                                                                            | 10                 |
| Study size                | 10     | Explain how the study size was arrived at                                                                                                                                            | 7                  |
| Quantitative variables    | 11     | Explain how quantitative variables were handled in the analyses. If applicable, describe which groupings were chosen and why                                                         | 10-11              |
| Statistical methods       | 12     | (a) Describe all statistical methods, including those used to control for confounding                                                                                                | 10-11              |
|                           |        | (b) Describe any methods used to examine subgroups and interactions                                                                                                                  | 10-11              |
|                           |        | (c) Explain how missing data were addressed                                                                                                                                          | 10                 |
|                           |        | (d) If applicable, explain how matching of cases and controls was addressed                                                                                                          | N/A                |
|                           |        | (e) Describe any sensitivity analyses                                                                                                                                                | N/A                |
| <b>Results</b>            |        |                                                                                                                                                                                      |                    |

|                          |     |                                                                                                                                                                                                              |       |
|--------------------------|-----|--------------------------------------------------------------------------------------------------------------------------------------------------------------------------------------------------------------|-------|
| Participants             | 13* | (a) Report numbers of individuals at each stage of study—eg numbers potentially eligible, examined for eligibility, confirmed eligible, included in the study, completing follow-up, and analysed            | 12    |
|                          |     | (b) Give reasons for non-participation at each stage                                                                                                                                                         | N/A   |
|                          |     | (c) Consider use of a flow diagram                                                                                                                                                                           | N/A   |
| Descriptive data         | 14* | (a) Give characteristics of study participants (eg demographic, clinical, social) and information on exposures and potential confounders                                                                     | 12-13 |
|                          |     | (b) Indicate number of participants with missing data for each variable of interest                                                                                                                          | 12-13 |
| Outcome data             | 15* | Report numbers in each exposure category, or summary measures of exposure                                                                                                                                    | 12-13 |
| Main results             | 16  | (a) Give unadjusted estimates and, if applicable, confounder-adjusted estimates and their precision (eg, 95% confidence interval). Make clear which confounders were adjusted for and why they were included | 13-14 |
|                          |     | (b) Report category boundaries when continuous variables were categorized                                                                                                                                    | N/A   |
|                          |     | (c) If relevant, consider translating estimates of relative risk into absolute risk for a meaningful time period                                                                                             | N/A   |
| Other analyses           | 17  | Report other analyses done—eg analyses of subgroups and interactions, and sensitivity analyses                                                                                                               | N/A   |
| <b>Discussion</b>        |     |                                                                                                                                                                                                              |       |
| Key results              | 18  | Summarise key results with reference to study objectives                                                                                                                                                     | 15-16 |
| Limitations              | 19  | Discuss limitations of the study, taking into account sources of potential bias or imprecision. Discuss both direction and magnitude of any potential bias                                                   | 17-18 |
| Interpretation           | 20  | Give a cautious overall interpretation of results considering objectives, limitations, multiplicity of analyses, results from similar studies, and other relevant evidence                                   | 15-18 |
| Generalisability         | 21  | Discuss the generalisability (external validity) of the study results                                                                                                                                        | 18-19 |
| <b>Other information</b> |     |                                                                                                                                                                                                              |       |
| Funding                  | 22  | Give the source of funding and the role of the funders for the present study and, if applicable, for the original study on which the present article is based                                                | 20    |

\*Give information separately for cases and controls in case-control studies and, if applicable, for exposed and unexposed groups in cohort and cross-sectional studies.

**Note:** An Explanation and Elaboration article discusses each checklist item and gives methodological background and published examples of transparent reporting. The STROBE checklist is best used in conjunction with this article (freely available on the Web sites of PLoS Medicine at <http://www.plosmedicine.org/>, Annals of Internal Medicine at <http://www.annals.org/>, and Epidemiology at <http://www.epidem.com/>). Information on the STROBE Initiative is available at [www.strobe-statement.org](http://www.strobe-statement.org).
