# Supplementary figures and images for: Quality of life of patients with dementia in acute hospitals in Germany: a non-randomised, case–control study comparing a regular ward with a special care ward with dementia care concept
Source: PubMed Central journal article supplement — BMJ Open. 2019 Sep 6;9(9):e030743. doi: 10.1136/bmjopen-2019-030743 (PMC6731932; doi:10.1136/bmjopen-2019-030743), 2019-09-06

### Supplemental Material 1

#### Main Diagnosis by Hospital Ward

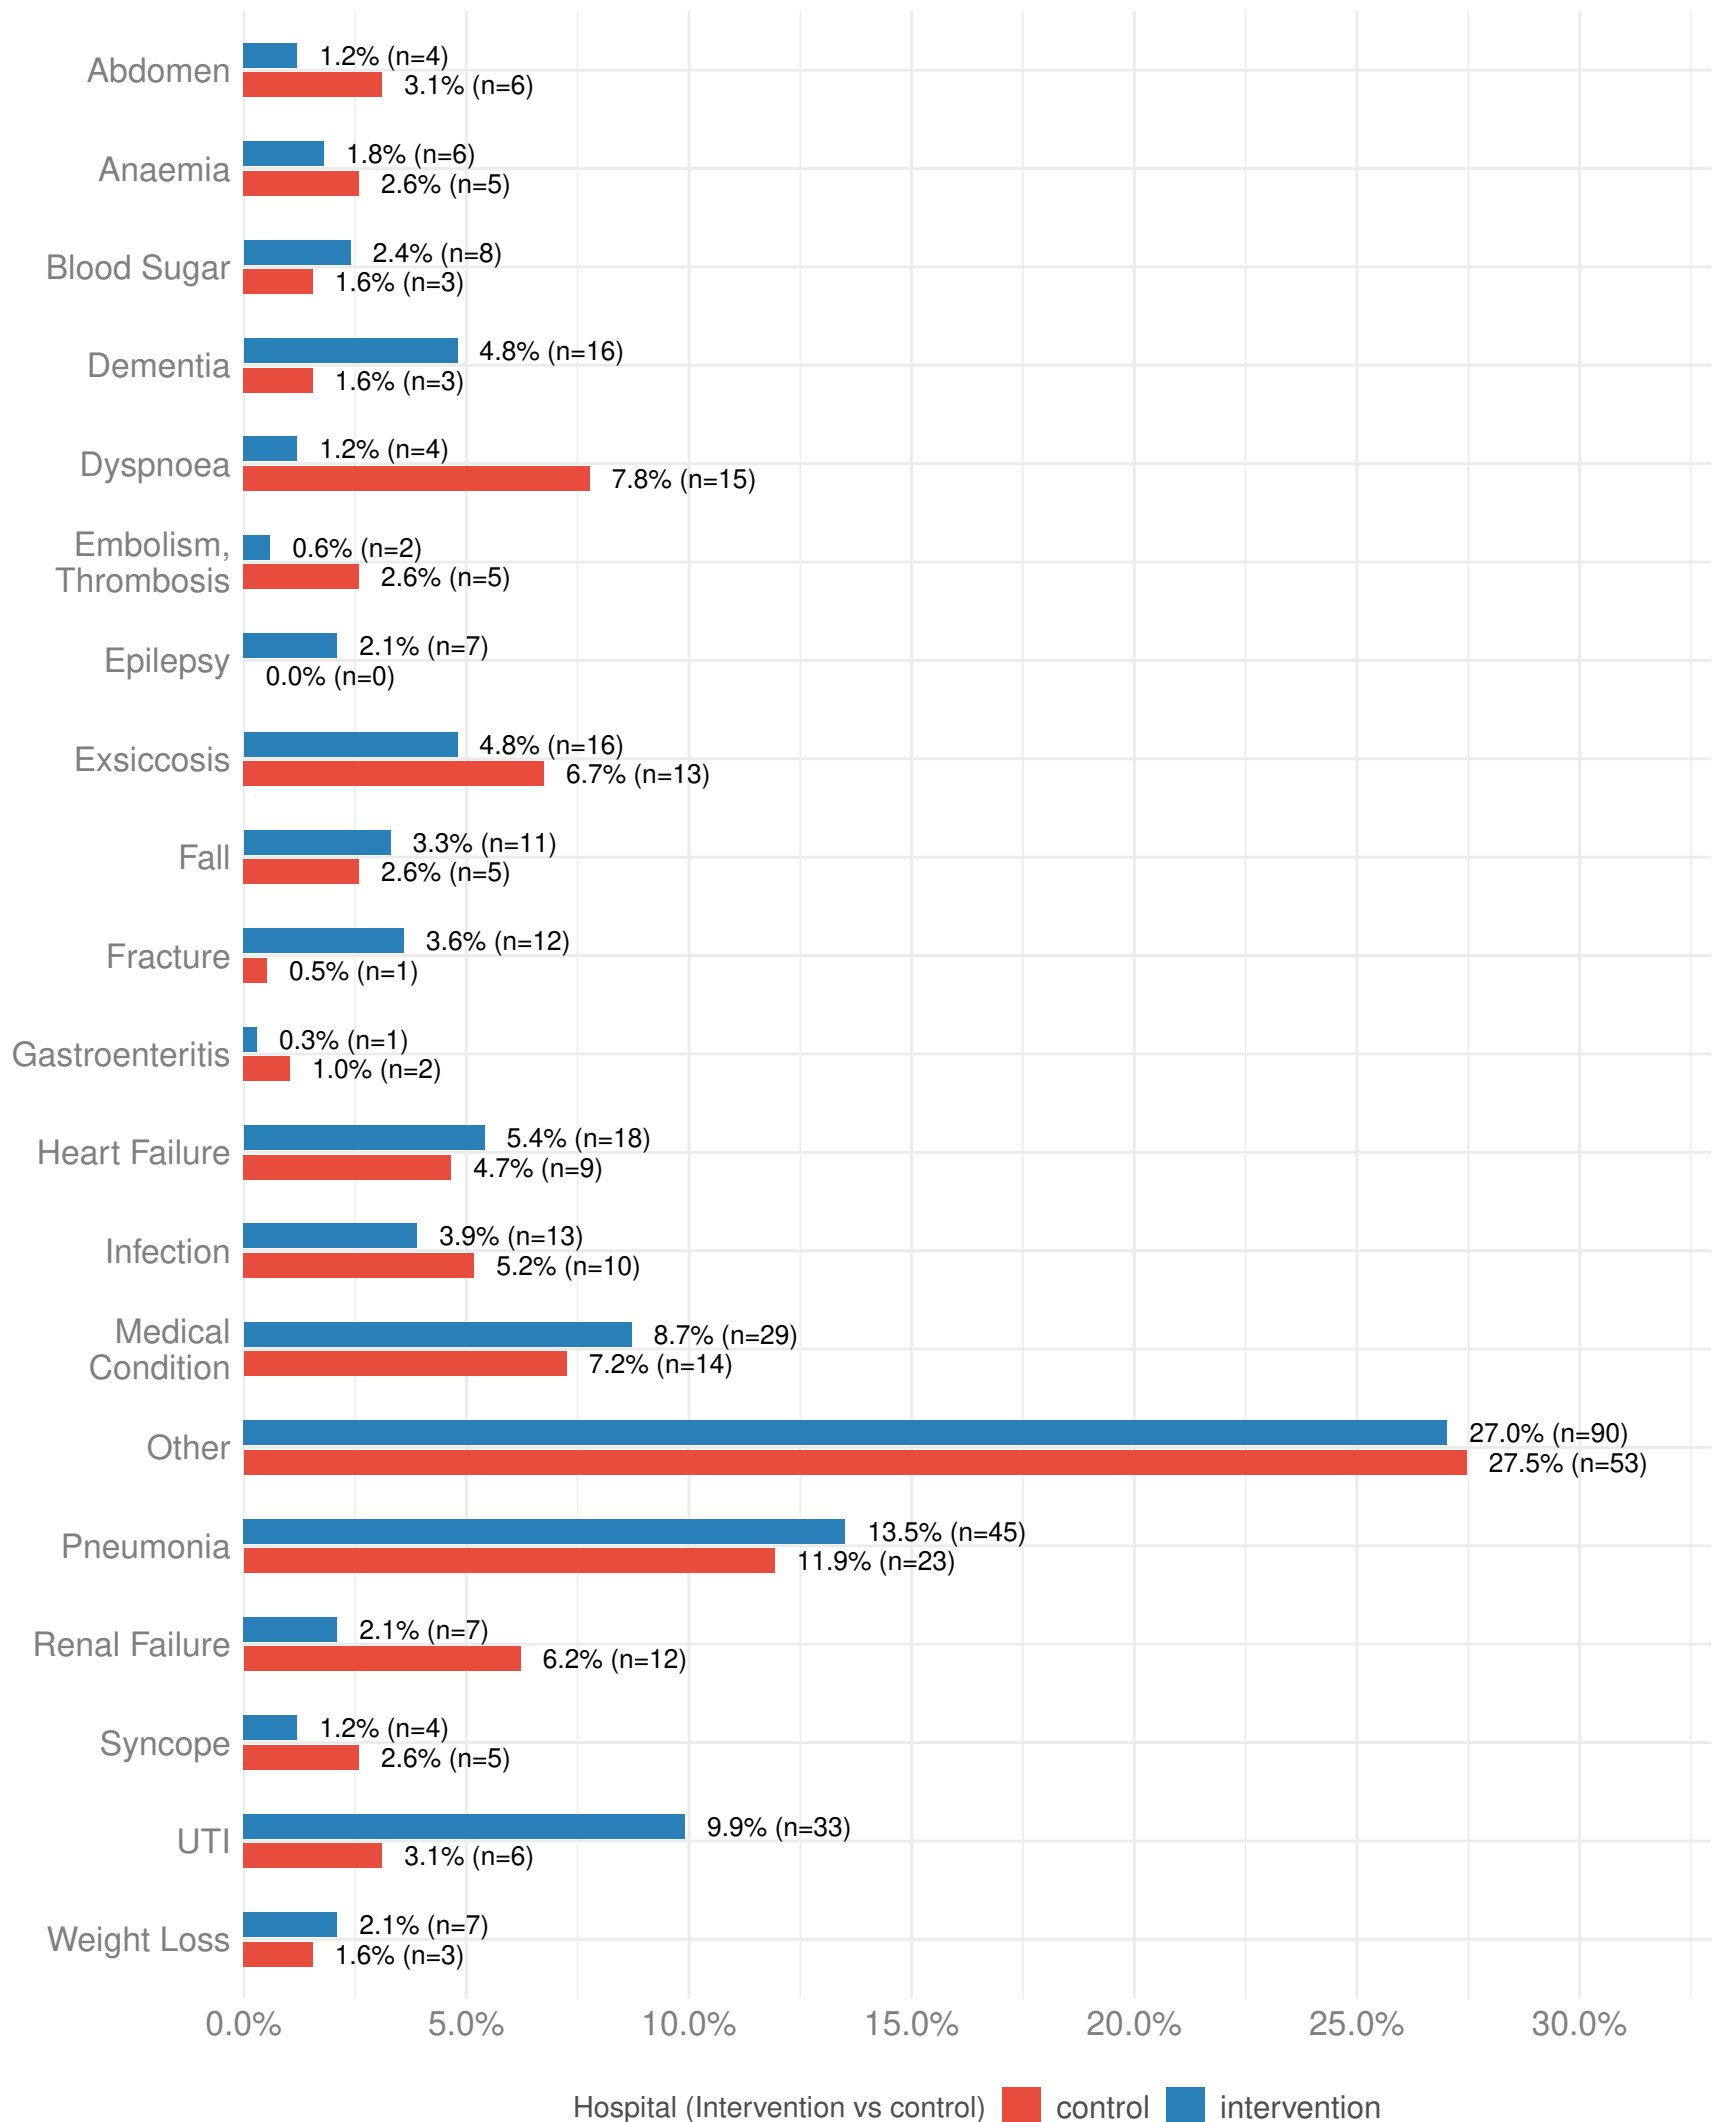

Supplement: bmjopen-2019-030743supp001.pdf [file bmjopen-2019-030743supp001.pdf]
